# Supplementary material for: Predation experiments with 3D-printed lizard models yield limited responses in pheasants
Source: PeerJ. 2025 Nov 3;13:e20103. doi: 10.7717/peerj.20103 (PMC12591047; doi:10.7717/peerj.20103)
Supplement: Supplemental Information 3 — (K6) Six distinct colours. (K9) Nine statistically distinct colours, with multiple pairs indistinguishable under avian and reptile visual models. (K13) Thirteen statistically distinct colours, with multiple pairs indistinguishable under avian and reptile visual models. [file peerj-13-20103-s003.xlsx]

## Sheet: K6
wl	K1	K2	K3	K4	K5	K6
330	0.141636443508303	0.135379417994683	0.175589060955182	0.14724539747337	0.169528915221193	0.126465622558178
331	0.137391757601831	0.130708838058626	0.171364379633098	0.142958497632595	0.165919298907848	0.12235897940891
332	0.131973017305704	0.124785529111277	0.166047567718391	0.137506599583039	0.161319240000527	0.117132126993831
333	0.125976011414674	0.118245204382246	0.160192840735674	0.131480896445574	0.15623135115886	0.111353529716487
334	0.119225759212664	0.110917691146733	0.153529115228947	0.124640852592087	0.150374952546201	0.105002085012889
335	0.11228719543291	0.1033933807846	0.146663140091216	0.117597223559593	0.144326426490794	0.0985074284527272
336	0.105270020792695	0.095786313158971	0.139513494343748	0.110333489962098	0.137963612579913	0.0922289496895745
337	0.0982830971598312	0.0882103276408582	0.13236913863688	0.103082813555757	0.131597982324108	0.0860152926103408
338	0.091862804803755	0.0812188834548061	0.125642167869307	0.0962962496383765	0.125558841175099	0.0805622559081456
339	0.0856643330189874	0.0744628066268451	0.11913412111502	0.0897319177980434	0.119708965253389	0.0753296407793184
340	0.0804115173540095	0.0687101380096935	0.11355938199632	0.0841149963914393	0.11466595687964	0.0710367176211651
341	0.0756172841156735	0.0634546629662337	0.108451624017354	0.0789782522679523	0.110038220007191	0.0671562187812352
342	0.0717975385339517	0.0592557242668689	0.104336200960322	0.0748618848710892	0.106292935075004	0.0641521216175303
343	0.0685410289686318	0.0556738833397582	0.100796246364078	0.0713425476453833	0.103071246425799	0.0616305602167609
344	0.0659729189789143	0.0528462730231803	0.0979596421087942	0.0685529139622031	0.100489508789128	0.0596987647484682
345	0.0639589587939026	0.0506253419692036	0.0956931952322636	0.0663543969108034	0.0984436426469138	0.0582167091704496
346	0.0623300857613137	0.0488260015892379	0.0938229594155443	0.0645666558238616	0.0967701617805079	0.0570471847026216
347	0.0611243442535067	0.0474912059184456	0.0924080700678917	0.0632350174001661	0.09551452292104	0.0562095434602703
348	0.0600831538942259	0.046337066523443	0.0911702599026539	0.0620807522343997	0.0944213781753813	0.0555009679167154
349	0.0593309754754186	0.0455046544966269	0.0902850325761168	0.0612466599438134	0.0936278515784558	0.0550055242307317
350	0.0586297991637538	0.044729017887726	0.0894620257505268	0.060469068748847	0.0928871987724832	0.0545476920490253
351	0.0581368929638521	0.0441849379583259	0.0889252419798114	0.0599263027893735	0.0923760477414942	0.0542232719035129
352	0.0576691103125898	0.0436671937069749	0.0884194913581779	0.0594109049815738	0.0918919906155768	0.0539123394748856
353	0.0573543973414262	0.0433079230201674	0.0880984810596939	0.0590610630399205	0.0915722749224322	0.0536803505428977
354	0.0570795578567187	0.0429865350750212	0.0878176373027204	0.058752182682247	0.0912928179552725	0.0534678669170178
355	0.0569243388313793	0.0427787953548589	0.0876572931702788	0.0585661870765132	0.0911341371660679	0.053313899209462
356	0.0568248780413654	0.0426229701932818	0.0875594165669235	0.0584379060197895	0.0910370101101478	0.053188116559845
357	0.0568163912142513	0.0425518477325546	0.0875634606689196	0.0584037908061878	0.0910403128295865	0.0531083200573911
358	0.0568694276758883	0.0425403968299075	0.0876739781665304	0.0584375141950037	0.0911286601930964	0.0530603599285125
359	0.0569792548656033	0.0425840273654884	0.0878827787985548	0.058533857832205	0.0912955103049796	0.0530417872213958
360	0.0571354404561489	0.0426734848646273	0.0882246547191258	0.0586829081937836	0.0915407067420782	0.0530473984852057
361	0.0573165882625263	0.0427876184210667	0.0886381865642987	0.0588603390992578	0.0918280896619852	0.0530660318872068
362	0.057525391880804	0.0429237959507417	0.0892077814380232	0.0590673466626441	0.092177964537747	0.0530972012018157
363	0.0577415470440171	0.0430658332707704	0.0898188614206031	0.059282216375602	0.0925444511992422	0.0531317028476242
364	0.0580582241038984	0.0432918464979172	0.0907675084938934	0.0596003064526288	0.093077462542585	0.0532216946932719
365	0.0583980913426987	0.0435384406669689	0.0917848397139424	0.0599424125682224	0.0936459177217325	0.0533259310059563
366	0.058964328510841	0.0439930676321101	0.0934183485589114	0.060520150907992	0.0945427999503164	0.0535777352908389
367	0.0595815533733454	0.0444956317132251	0.0952163040389258	0.061149926577455	0.0955168574663568	0.0538652243621461
368	0.0604161468276043	0.0452025592887544	0.0977153214893975	0.062001545599821	0.096819925418396	0.0543048433124215
369	0.0612883502002068	0.0459425842335951	0.100488007921185	0.0628889172441624	0.0982169434953648	0.054771317486945
370	0.0622369131039919	0.0467498068676439	0.103816325315039	0.0638488775452415	0.0998047087956753	0.0552923159046391
371	0.0631775712779677	0.0475388544149373	0.107520557546299	0.0647952173889966	0.101489855971476	0.0558039694361519
372	0.0641089499865153	0.048306565990822	0.111666081108428	0.0657255680002409	0.103289321001114	0.0563046528838868
373	0.0650191357719639	0.0490338759174401	0.116295817752501	0.0666265640705611	0.105217222405861	0.0567842941535727
374	0.0659151929420132	0.0497342514112138	0.12124836311787	0.067507990446932	0.107230748060682	0.0572499073045593
375	0.0668202123007721	0.0504099136322493	0.12675108501446	0.068380793808919	0.10940380116222	0.0577188451874929
376	0.0677283805366451	0.0510768928115119	0.132447112178776	0.0692505674631494	0.111632904447739	0.0581889512194889
377	0.0686792958043714	0.0517345983052236	0.138761051014713	0.0701326849325223	0.114041829528482	0.0586918017569706
378	0.069637183362115	0.0523909000992225	0.145172999924741	0.0710168058894919	0.116479115316863	0.0592001436220807
379	0.070652966367271	0.0530454222113552	0.152147114889522	0.0719166687841858	0.11906398874237	0.0597677340653937
380	0.071678258843644	0.0537023220633418	0.159184968862885	0.0728203725418027	0.121666957005019	0.0603467625131875
381	0.072757438323581	0.0543726957745006	0.16658401055155	0.0737458411893161	0.124372462678137	0.060990606319706
382	0.073852519230685	0.0550500673549434	0.174051374806601	0.0746794785943262	0.127104614305876	0.0616554722182293
383	0.0749865312180945	0.0557445716498404	0.181686011551772	0.0756331153711384	0.129902002581135	0.0623718059971784
384	0.0761271314561555	0.0564350402695961	0.189331452477508	0.0765860759264193	0.132707709643432	0.0631033970166158
385	0.0772764649567083	0.0571201592734668	0.19699121522399	0.0775381400950193	0.135524443935057	0.0638552127501888
386	0.0784081243427805	0.0577717273935526	0.204581324370076	0.0784662025934721	0.138305202891166	0.064603145663713
387	0.0795264506249463	0.0583979851978007	0.212118887817617	0.0793761585688313	0.141058822559079	0.0653481494322882
388	0.0805986077133564	0.0589609257422043	0.219459157509436	0.0802381125288647	0.143718489799253	0.0660649963105912
389	0.0816519069620634	0.0594980043072346	0.226718842427792	0.081080460031934	0.146339782104154	0.0667703424872338
390	0.0826353866297184	0.0599525371436381	0.233679404197107	0.0818548198706052	0.148830355779997	0.0674209329160382
391	0.0836055673295539	0.0603913469841126	0.24058299012851	0.0826162296779626	0.151296030669353	0.0680610936785878
392	0.0844629637542699	0.0607165511085549	0.246997670947534	0.0832693119626202	0.15356726001279	0.0685928256436783
393	0.0853004329887997	0.0610233310431058	0.253284422744531	0.0839014784877801	0.15579078195474	0.0691076093581623
394	0.086019947152956	0.0612223266382347	0.258781807703027	0.0844084654395282	0.157721588213733	0.0695237791213805
395	0.0866941651567176	0.0613796656918273	0.263806998849224	0.0848621437396229	0.159486098869794	0.0699158432296498
396	0.0872459157638566	0.061424377799785	0.267555517836237	0.0851716912408027	0.160800995488296	0.070242732789354
397	0.0876945599823587	0.0613744557196147	0.27012369306689	0.0853622890730111	0.16170122175123	0.0705249741592628
398	0.0879948315928224	0.0611883527345773	0.270993324843266	0.0853817154303581	0.162004727258591	0.0707429656950757
399	0.0880975553585294	0.0608130204623879	0.269929424620888	0.0851885470032709	0.161627190906365	0.0708432441847168
400	0.0880386490694353	0.0602828642279831	0.267283543672256	0.0848214373889194	0.160692438487205	0.0708472120002174
401	0.087826069341944	0.0595778540920384	0.263873157440081	0.0842996809053854	0.159453898559114	0.0706907495086348
402	0.0875444479247379	0.0587942864061265	0.260119297819648	0.0837084453936679	0.158078874387882	0.0704622096327104
403	0.0874427419410639	0.0581234478719765	0.259424699979815	0.0833094407883939	0.157672837243425	0.0702592840548339
404	0.0873778861064265	0.0574756984411995	0.259356697926369	0.0829498087784155	0.15746526732132	0.0700616047789672
405	0.0878396999325282	0.057285548556253	0.265110309413459	0.0831163773468798	0.159154667307386	0.0702414777416182
406	0.0883629682784447	0.0571547933991524	0.271410343649541	0.0833412632247607	0.161021858027664	0.0704838426232468
407	0.0892174522521138	0.0573558141155856	0.280397112087247	0.0838744649106064	0.163762606867774	0.0710988511727655
408	0.0900661990121426	0.057562328514398	0.289062543832607	0.0843930509863141	0.166392847024524	0.0717488907837688
409	0.0908986167795031	0.057784478778444	0.296813401915132	0.0848700387870133	0.168708562467098	0.0724986341851515
410	0.0916390758514563	0.0579290752134138	0.303434860294624	0.0852477461018444	0.17064499706357	0.0731990617677536
411	0.0922415968802984	0.0579573409047696	0.308362219119566	0.085476532687873	0.172012510390889	0.0738255156221848
412	0.0927313522843809	0.0578848947536616	0.312085904737207	0.0855941697193502	0.172982905229864	0.0743554674920989
413	0.0931288449045691	0.057730048004174	0.314824766821603	0.0856208662061942	0.173628384942011	0.0748064631928627
414	0.0934414110824703	0.0574897126897189	0.316739511061669	0.0855657080755621	0.174007720411173	0.0751651731330045
415	0.0937158219022425	0.0572109694692638	0.318283999458629	0.085473774682006	0.174267483829138	0.075482421354606
416	0.0939464236983915	0.0568903355795553	0.319488217621301	0.0853481754132006	0.174420580760862	0.0757387355434458
417	0.0941686809186122	0.0565617225147508	0.320627622406014	0.0852161635967287	0.174553360266637	0.0759834432498549
418	0.0943763552583825	0.0562229159263451	0.321607440252953	0.0850781066207178	0.174642317662802	0.0762262509457387
419	0.0945854879031865	0.0558875528892539	0.322577777920093	0.0849429366555287	0.174731566669839	0.0764751730627466
420	0.0948063716703737	0.0555766273652041	0.323506467325225	0.0848279130891037	0.174828752349836	0.0767652742663598
421	0.0950377813426621	0.0552768198382821	0.324440467148651	0.0847222649123763	0.17493404045173	0.0770761112661456
422	0.0952976499435578	0.0550070720813727	0.325388824769683	0.0846419650114983	0.175061235101717	0.0774430117148426
423	0.0955779566633042	0.0547566546663383	0.326323622558253	0.0845768481216035	0.175190751771379	0.0778478402758584
424	0.0958864874519395	0.054532931532941	0.327239694863901	0.0845326982468762	0.175323475039641	0.0783050457538857
425	0.096207914431448	0.0543217079417848	0.327817325891945	0.0844947086311768	0.175366134952977	0.0788068498627892
426	0.0965394741323568	0.0541203054195322	0.328129038773302	0.0844615592189992	0.175338030801729	0.0793436957530956
427	0.0968422634086008	0.0539127180991278	0.327309141002938	0.0844067365097308	0.175000543170339	0.079897798983051
428	0.0971333013846296	0.0537026045935628	0.326027036064971	0.0843430613270028	0.174536687638608	0.0804589509855392
429	0.0973077405796146	0.053443785095336	0.322379747952182	0.0841957959242827	0.17341202300913	0.0809469700867622
430	0.0974631985776856	0.0531770367145829	0.318347430020235	0.0840349228113312	0.172179784805599	0.0814230838319652
431	0.0974588032463272	0.0528303468210335	0.311914133304859	0.0837622768354233	0.170274715052464	0.0817350918044129
432	0.0974589122501761	0.052485550442344	0.30571837210796	0.0834968271872623	0.16843860583972	0.0820330288765658
433	0.0974845458201996	0.0521514839811937	0.300868645515768	0.0832721567296672	0.166993273022528	0.0822512308470482
434	0.0975971302694565	0.0518640294308852	0.297829378707506	0.0831251634388875	0.166066894169275	0.0824932565908209
435	0.0979126001035914	0.0516853360058738	0.299014518061745	0.083159416870677	0.166351407898543	0.0827908711389376
436	0.0983571850814256	0.0515859861582995	0.302707914708693	0.0833088566088491	0.167355812937962	0.0831421112688336
437	0.0989595774571144	0.0515836117942594	0.309466959157843	0.0835990796103774	0.169240085134232	0.0835588937764598
438	0.0995747259046082	0.0516106351594117	0.316756987179048	0.0839146750382869	0.1712800542203	0.0839612703149203
439	0.100198738740983	0.0516580874550196	0.324416003784222	0.0842479021523256	0.173428219450127	0.0843536359256555
440	0.100679022091088	0.0516594283990871	0.330113148365894	0.0844889224576784	0.175020381202361	0.0846305015087489
441	0.101108805891962	0.0516445680574782	0.335120986560931	0.0846975457761955	0.176417190381386	0.0848667860010493
442	0.101376259220064	0.0515698729583488	0.337797869055883	0.0848004183825794	0.177153700175805	0.0849835722415074
443	0.101620057835544	0.0514864513726515	0.340129792276582	0.0848878284748739	0.177792540373069	0.0850836743873104
444	0.10177766295271	0.0513710814799499	0.341096988475035	0.0849178257346764	0.178045951109785	0.0851378249859527
445	0.101932214316196	0.0512549415076752	0.341970112903036	0.0849444912645722	0.178271707152041	0.0851987647854633
446	0.102073747045568	0.0511355185645888	0.342442194520163	0.0849569531038133	0.178379566865277	0.0852886480202549
447	0.102226356154886	0.0510227870509914	0.342902779877682	0.0849726585280802	0.178480165761534	0.0854131629404251
448	0.102400466472334	0.0509230447828727	0.343341048966553	0.0849946603232794	0.178566670130713	0.0856049040733888
449	0.10259902230382	0.0508368290799559	0.343774888358285	0.0850253735229296	0.178647333268028	0.0858612010522949
450	0.102823021425427	0.0507646920469431	0.344204117248914	0.0850651536945594	0.178721916755853	0.0861846888096308
451	0.103081432228039	0.0507093807032818	0.344631262784027	0.0851179239343825	0.178793804931231	0.0865957657757043
452	0.103359199601216	0.0506635338098806	0.345057236431662	0.0851780010875645	0.178864176993358	0.0870561116716927
453	0.103671712684524	0.0506320143713145	0.345470350404647	0.0852510564038625	0.178932227291084	0.0876190006515257
454	0.103993461969259	0.050604303496692	0.345880045983105	0.0853275616116217	0.178999660410931	0.0882091479194694
455	0.104347574778097	0.0505856862849071	0.346270359403736	0.0854156576245705	0.179066590272763	0.0889141161104216
456	0.104705167402647	0.050567516807353	0.346657488588323	0.0855048136640243	0.179133147455359	0.089634275859899
457	0.105075486556879	0.0505481529187975	0.347027094079602	0.0855968513943612	0.179196639630498	0.090425198680333
458	0.105445214918316	0.0505269476212235	0.347397790289907	0.0856879282702289	0.179258624976374	0.0912222453191635
459	0.105813170901367	0.0505002180965938	0.347771758657289	0.085776122582689	0.179316089834463	0.0920376634131835
460	0.106174665363062	0.050471427476746	0.348152704834168	0.0858614415956035	0.179370753679695	0.092836211407541
461	0.106526467542723	0.0504395452140708	0.348544117725292	0.0859424476591997	0.179421216005641	0.0936094542524049
462	0.106865303513617	0.0504056027434212	0.348946464269847	0.0860190718284784	0.17947223359976	0.0943230508786772
463	0.107193530768248	0.0503699746480651	0.349357756530848	0.0860921108114973	0.179523705504203	0.0949878460533747
464	0.10749108518991	0.0503275472288398	0.349770373706035	0.0861544744245274	0.179577549682926	0.0955196922945947
465	0.107776111271345	0.0502823426209918	0.350183532043355	0.0862124776751677	0.179632362818749	0.0959972354503099
466	0.108010847765024	0.0502252010593426	0.350593131993337	0.0862527343781618	0.1796858534659	0.0962756592490217
467	0.108236702274924	0.0501659786713433	0.35100194259529	0.0862898719681417	0.179739071070263	0.0965192544715898
468	0.108393721421331	0.0500931337533943	0.351389955705713	0.0863042256840906	0.179786571035083	0.0965238837816044
469	0.108538319250621	0.0500178744533159	0.351771653474909	0.0863144335017895	0.179833380267361	0.0964932297051206
470	0.108622271825749	0.0499308272875472	0.352122517519296	0.0863043995809736	0.179876817099581	0.0962903096827918
471	0.108687247429903	0.0498388602549566	0.352466292091959	0.0862873649289051	0.179920115893506	0.0960448108246575
472	0.108711896970736	0.0497364385053696	0.352795001537205	0.0862554537229248	0.179963121356055	0.0957088319404367
473	0.108723494907783	0.0496329057758906	0.353126471943074	0.0862206920716214	0.180007496457338	0.0953628549774026
474	0.108720953607392	0.0495281694848621	0.353460933389618	0.0861828424378846	0.180053355333917	0.0950060467623209
475	0.108729277914884	0.0494350060785608	0.35381053521364	0.0861566382598725	0.180104411975702	0.0947073675899276
476	0.108743983611132	0.0493486394458295	0.354169029005386	0.0861372734764922	0.180158521273243	0.0944428276965735
477	0.108807876964782	0.0492928508717319	0.354537078360892	0.0861501202859472	0.180223451787089	0.0943386571447928
478	0.108884845518501	0.0492451906423344	0.354907667802968	0.0861715296707127	0.180291258826787	0.0942771164179872
479	0.109053728994651	0.049242137136784	0.355285898331944	0.0862430419957865	0.180376527843405	0.0944898549083801
480	0.109240367451707	0.0492469209175788	0.355664854178174	0.0863236496263939	0.180465096747249	0.0947560768999787
481	0.10953399854743	0.0492966151362482	0.356045948319129	0.0864573324666263	0.180573333287678	0.0953460857457394
482	0.109861053254669	0.0493597627878201	0.356423777933622	0.0866071628737378	0.180686660865029	0.096041388134738
483	0.110283236702378	0.0494612009791913	0.35679231620357	0.0868029517404276	0.180814478316694	0.0970363721467985
484	0.110759962967893	0.0495847407412228	0.357147422836784	0.0870249003630248	0.180946580727668	0.0982146335576579
485	0.111315177678543	0.0497400852024974	0.357483201017133	0.0872844935124154	0.181084849299599	0.0996566356155691
486	0.111936507092542	0.0499230279365319	0.357794857027802	0.0875755389101089	0.181226516709813	0.101351514737564
487	0.112607712510823	0.0501267904201925	0.358088315612218	0.0878903114424869	0.181370748155922	0.103237160767553
488	0.11334700807315	0.0503597609457035	0.358376689960173	0.0882370307602209	0.181528270434541	0.105429472487509
489	0.114111487661356	0.0506035344455976	0.358663183837106	0.0885955660122647	0.181690708500527	0.107735208503755
490	0.11493517722932	0.0508755491664256	0.358990120488759	0.0889821150137155	0.1818813691657	0.110358913220722
491	0.115768398282644	0.0511522592579445	0.359324904636186	0.0893732651409996	0.18207682445742	0.113034217573625
492	0.116654740887363	0.0514578865345083	0.359728063597665	0.0897917453237468	0.182303634312244	0.116004725132931
493	0.117547795233208	0.0517691151553679	0.360140665958547	0.0902150372412774	0.182535078038562	0.119012341469711
494	0.11846769654356	0.0521027491534108	0.360591041917044	0.090657576097942	0.182785057250858	0.122168392916388
495	0.119393271499475	0.0524460837488967	0.361044672139805	0.0911085545073033	0.183041611125732	0.125346506615669
496	0.120328932936393	0.0528066638509479	0.361504087721258	0.0915745365659034	0.183309853289635	0.128563842097355
497	0.121260322778208	0.0531748363916409	0.361957044802922	0.0920474735302225	0.183585612563102	0.131746384250849
498	0.122187769609161	0.0535500173372339	0.362404040192473	0.0925268304075129	0.183868310706934	0.13489680948601
499	0.123093083745198	0.0539207922517202	0.362833339581681	0.0930022714138543	0.184151148492445	0.137926247901266
500	0.123987982495391	0.0542894937398032	0.363254311441315	0.0934758696573961	0.184434051991688	0.14089875134245
501	0.124844838741646	0.054640856785403	0.363651949004799	0.0939335434584699	0.184706019244672	0.143664700954653
502	0.125694448796675	0.0549889172705297	0.364045141940444	0.094388184032407	0.184975903403131	0.146391306980384
503	0.126496691851322	0.0553130381538613	0.364425035390637	0.0948215971221548	0.18523349911512	0.148849855737984
504	0.127291803292018	0.0556337410833666	0.364805018836374	0.0952521677371072	0.18549104915741	0.151267032337185
505	0.128049473759476	0.0559364997552838	0.36518547475872	0.0956678153593841	0.18574835943378	0.15346700510479
506	0.128793760764918	0.0562335757626807	0.365569956085923	0.0960789741959952	0.186008880515092	0.155590165170499
507	0.129509607913572	0.0565185761079718	0.365962991398447	0.0964805943630664	0.186276224556906	0.157550098244681
508	0.130206796185589	0.0567968564937918	0.366363079748412	0.0968770470196832	0.186548993242722	0.159405599432599
509	0.130883770674581	0.057067856923518	0.36677080888894	0.0972679015399744	0.186827638626208	0.161147966077064
510	0.131539527005362	0.0573313920189836	0.367183622199075	0.0976535696224299	0.187110611186034	0.162771260015474
511	0.13218334812215	0.0575907278639276	0.367599295354614	0.0980363203336027	0.187396017782551	0.164327575556726
512	0.132794597992782	0.0578376877958716	0.368005129217092	0.0984080951144734	0.187679383068971	0.165732897683471
513	0.133398207694562	0.0580817447358772	0.368408655097247	0.0987772952944089	0.187962269529566	0.167102801601875
514	0.133964441279402	0.0583120921781813	0.368789503880051	0.099135411733162	0.188239646526925	0.168308270194453
515	0.134524400576248	0.0585404063051485	0.369165810619965	0.0994918794803869	0.188515677059415	0.169488518972931
516	0.135050106463206	0.0587579504327278	0.369516414284912	0.0998396077737209	0.188783836975626	0.170534023587133
517	0.13556702841733	0.0589734945761802	0.369862906644317	0.100186072057878	0.189050331698883	0.17154388675475
518	0.136062444880718	0.0591841422067701	0.370199333393599	0.100529441698877	0.189312749570425	0.172466489829006
519	0.136547513018399	0.0593926420324487	0.370543304459418	0.100871511632199	0.189577350141826	0.173344159615688
520	0.137020433121553	0.0595986205219268	0.370896131896821	0.101212055821726	0.189844513013061	0.17416908163
521	0.1374876597562	0.0598024954342103	0.371276797743015	0.10155257153005	0.190122451890207	0.174953354166802
522	0.137951396845634	0.0600050810572455	0.371674525839758	0.101893069782154	0.190406995416137	0.175712712507711
523	0.138413014686945	0.0602049465605144	0.372096626492009	0.102232001748999	0.190701094614299	0.176437113202616
524	0.138874034791606	0.0604040448505158	0.372525601454787	0.102570491943079	0.190997889002065	0.177151654048648
525	0.139328308642857	0.0605984219005935	0.372945526496532	0.10290093232301	0.191287378736945	0.177822413520489
526	0.139781785113405	0.0607923431728104	0.373361704305325	0.103230477259294	0.191574763023198	0.178486420318255
527	0.140231682855639	0.0609845872679489	0.37375141738709	0.103556205153726	0.191848222909815	0.179114435587046
528	0.140678799200513	0.0611759181532574	0.374132639476813	0.103880920162551	0.192117673103978	0.179728083390566
529	0.141118763380747	0.0613649007847172	0.374492027586998	0.104203030608386	0.192376812660398	0.180304786283387
530	0.14155733047717	0.0615538139115119	0.374845142273284	0.104526704189755	0.192633964275899	0.180863041650884
531	0.141994119466925	0.0617426385778235	0.375190272601882	0.104852367216348	0.192888585784774	0.181397818349785
532	0.142428487312495	0.0619294675494161	0.375527437339591	0.105176837832512	0.193138460369415	0.181911230131257
533	0.142861307213422	0.0621150205850406	0.375859509322469	0.10550054608791	0.193385300035285	0.182410982375358
534	0.14329819540645	0.0622998069267651	0.376189418554477	0.105823978996382	0.193629368884381	0.182899791995563
535	0.143736298803613	0.0624843642560259	0.376518681769991	0.10614732965837	0.193872610086908	0.183385333039799
536	0.144179470914624	0.0626693979197342	0.376847012545322	0.106469663895442	0.194116930617252	0.183860230583193
537	0.144623014364969	0.062854408292435	0.377174431714087	0.106791601833016	0.194361146623345	0.184332047691383
538	0.145066944596423	0.06303898422107	0.377494956707355	0.107110858270892	0.194603959524081	0.184784438018661
539	0.145510981418771	0.0632226731420231	0.377813214030755	0.107429223810894	0.194844828887643	0.185228533754204
540	0.145955306431315	0.0634039638570215	0.378125340246737	0.107745180627014	0.195080443502549	0.18565020337135
541	0.14639785776896	0.0635821395716591	0.378440466880341	0.108058558560691	0.195313960462864	0.18605437332577
542	0.146838151702188	0.0637563507403828	0.378759412227283	0.108368654280349	0.195544807680973	0.186436270982176
543	0.147276664561798	0.0639279409991383	0.37909942696256	0.108677788964622	0.195782420403648	0.186795023592626
544	0.147714038702209	0.0640978555941435	0.37945291229038	0.108986309216434	0.196024358612847	0.187138978550745
545	0.148147104643997	0.0642652357859987	0.379840640468626	0.109294318000774	0.196280032832143	0.187452195312915
546	0.148578955452839	0.0644319011461962	0.380238026886736	0.109602182525058	0.196539581310698	0.18775674232751
547	0.149011570945661	0.0645983009581998	0.380669513595577	0.10991362740279	0.196816012433837	0.188030438151124
548	0.149444379435809	0.064764534187595	0.381105807995519	0.110225523110552	0.197094922643639	0.18829926692929
549	0.149878354535621	0.0649295567522255	0.381563390198666	0.110539217401758	0.197385172028313	0.188544649705299
550	0.150313794460615	0.0650942229065653	0.382028105551216	0.110853499339742	0.197678414639542	0.188786471805335
551	0.150753001078934	0.0652579725773004	0.382511163287943	0.111169292369442	0.197979354119052	0.189019137881444
552	0.15119738337154	0.0654217583777053	0.383003323006854	0.111486949748519	0.198283539650784	0.18925127284655
553	0.151648091488276	0.0655855883365954	0.383506607370656	0.111806885776833	0.198591692579675	0.189482758675987
554	0.152109786183094	0.0657512160733476	0.384012295377384	0.112131759781369	0.198905614964909	0.189717661907847
555	0.152578214587061	0.0659179456739506	0.384519456584614	0.11245966028746	0.199223073468545	0.189954659676675
556	0.153064377036475	0.0660901633882938	0.385034535746992	0.112798056768539	0.199555239118647	0.190195839108765
557	0.153555253599237	0.0662638399683148	0.385551719682257	0.113139243318919	0.199891314263378	0.190438130122227
558	0.154069222918969	0.0664459368340375	0.386106575260362	0.113496359974268	0.20025309380934	0.190683717911507
559	0.154587156474159	0.0666295195404159	0.38667140696469	0.11385642626686	0.200619603436942	0.190930418251391
560	0.15512518058634	0.0668206979853621	0.387292497382575	0.114231790390971	0.201010600652877	0.191183644828986
561	0.155669820949538	0.0670146100277771	0.387933273644012	0.114612596911396	0.201409337457725	0.191440058264377
562	0.156229899231777	0.067214900464286	0.3886199835404	0.115006102356554	0.201826133303371	0.191703907701295
563	0.156800570094489	0.067419089163731	0.389336083136626	0.115408161769664	0.202256411302952	0.19196942150983
564	0.157383185781989	0.0676276737766994	0.390085324309263	0.115819867146634	0.202701892582504	0.192236812162953
565	0.157971350758862	0.0678359618510515	0.390857201064841	0.116235507157476	0.203161166282806	0.192497330298671
566	0.158562503814629	0.0680440902507641	0.391641266211234	0.116653265817324	0.203627866671203	0.192754147848094
567	0.159154894564241	0.0682468753865508	0.392432813070464	0.117070010033069	0.20410741879871	0.192999920009745
568	0.159747557002746	0.0684484876107439	0.393226002256902	0.117486531565962	0.204589792039679	0.193243267574081
569	0.160337864540631	0.0686418823887252	0.394004279461653	0.117897178729222	0.205077631276007	0.193476222452021
570	0.160928437565372	0.0688340656050648	0.394780349073193	0.118306941787911	0.20556578561728	0.193707671802161
571	0.161520529277198	0.069020323896449	0.39554561960728	0.118712374817196	0.206055304396127	0.193931768258661
572	0.162110307326879	0.0692028245938702	0.396305609470925	0.11911354026059	0.206542284752536	0.194150359099853
573	0.162695594150045	0.0693780311383046	0.397055348621358	0.119506421566665	0.207024337583036	0.194358262570152
574	0.16327558800257	0.0695478655248322	0.397794795022593	0.11989176513654	0.207498078915451	0.194553303213849
575	0.163850496451931	0.069712538426312	0.398524352311852	0.120269866567712	0.207963834690881	0.194735985455516
576	0.164416514414406	0.0698733097175589	0.399227632023356	0.120637486355076	0.208406921791937	0.194897704313727
577	0.164978348618348	0.0700322449569315	0.399918545815916	0.121000173604178	0.208839341281521	0.195049558050313
578	0.165524008005886	0.070190181230994	0.400562191306821	0.121347226819798	0.209228321942295	0.195176168473676
579	0.166066775812954	0.0703480464190385	0.401196929777835	0.121691368595371	0.209608920610501	0.195298148389473
580	0.166601186396779	0.0705088712788973	0.40179247442604	0.1220236645748	0.209947144656733	0.195403278403084
581	0.16713634385093	0.0706701311322714	0.402383585385517	0.122354459692064	0.210279933720677	0.195507743244689
582	0.167674488786383	0.0708331309597066	0.40295696159009	0.122679251360661	0.210590982855467	0.195609547398271
583	0.168214952657947	0.0709946114804231	0.403518673707089	0.123000214370147	0.210893219773254	0.195714905872781
584	0.168759200056851	0.0711536131322825	0.404061354944361	0.123314930620027	0.211181078863298	0.19582606350249
585	0.169304614231754	0.071306890554544	0.404578674677706	0.123620820739062	0.211451567449845	0.195946428583283
586	0.169850945159227	0.0714556703678357	0.405076067515107	0.123919776041003	0.211708407783643	0.196074028089929
587	0.170399443549904	0.0715961358138947	0.405547878144124	0.124207101603418	0.21193960272584	0.196215677567591
588	0.170948743605053	0.0717335260830319	0.406010226860451	0.124490125755324	0.212161312386211	0.196362523609876
589	0.17148724827914	0.0718586712148024	0.406448105618327	0.124754422191697	0.212349477567641	0.196512923351197
590	0.172023590218475	0.0719816936596463	0.406881069325364	0.125015454510347	0.21253166635682	0.196662403751841
591	0.172547338971242	0.0720942323665654	0.407285341164236	0.125260249679128	0.212683278872149	0.196797269890189
592	0.173067104284244	0.0722045087649341	0.407674604139426	0.125500808328248	0.212826574424215	0.196925583177003
593	0.173575532114837	0.0723083462851208	0.408021149579524	0.125729309190646	0.212946198619304	0.19703524604022
594	0.174079885583228	0.0724101878593534	0.408339983771337	0.125952372467596	0.213052930023362	0.197139118268459
595	0.174579053499727	0.0725094891387352	0.408623549101694	0.126168515181251	0.213143252420653	0.197235620597635
596	0.175079040320607	0.0726070523259159	0.408887375992947	0.126380197690283	0.213219479229124	0.197335408751983
597	0.175579550703305	0.0727035042738205	0.409138583226412	0.12658902859308	0.213286694103761	0.197437297679801
598	0.176078673842182	0.0727955688557886	0.409386215528164	0.126791623008789	0.213338775233085	0.19755066894913
599	0.176577428220042	0.0728864671759255	0.409632897531613	0.126992559624133	0.213386833468086	0.197667092486456
600	0.177071860534153	0.072970723474229	0.409885783823491	0.127186954376259	0.213422821508887	0.197792064364142
601	0.177565290730002	0.0730541558853302	0.410139710943113	0.12738067633188	0.213457757042049	0.197916664307048
602	0.17805379973079	0.0731340836679666	0.4103984487371	0.127571732286081	0.213488843760119	0.198037658456792
603	0.178540857227085	0.073214327177697	0.410657962029264	0.127762954751434	0.213520128697853	0.198155377116961
604	0.179024967729411	0.073295211709103	0.410919049817725	0.127954515284881	0.213551816081572	0.19826644554072
605	0.179507977419915	0.0733791890383705	0.411180093493855	0.128147643805661	0.21358420522853	0.198376658692246
606	0.17998992946769	0.0734661378793089	0.411441094787551	0.128342278824075	0.2136172686186	0.198486050111625
607	0.180477012004078	0.0735598672528636	0.411700592265834	0.128542228748826	0.213649644634334	0.198598065262725
608	0.180966508888049	0.0736567874652965	0.411959382066278	0.12874467980597	0.213681697179794	0.198711315111105
609	0.181459163740565	0.0737604458271141	0.41220305727775	0.128953222428629	0.213709004363873	0.198821101762588
610	0.181952270178366	0.0738653585828332	0.412443206796328	0.129162962440435	0.213735370635463	0.198929797226595
611	0.18244387655335	0.0739740509992412	0.412657792033041	0.129377640186964	0.21375769502386	0.199025834820886
612	0.182935222340611	0.0740833405579716	0.412869659824335	0.129593313506258	0.21378026085311	0.199118625536612
613	0.183425644225948	0.0741947472576633	0.413071893036417	0.129812516583538	0.213803682699928	0.199199904591968
614	0.183913648050311	0.0743071800625206	0.413274084219343	0.130032313865437	0.213828549826393	0.199277903825092
615	0.184398172225957	0.0744210894577382	0.413476214921288	0.130252966222272	0.213855496745522	0.199351183314024
616	0.184882074396037	0.0745377937014868	0.41367877824024	0.130475371043577	0.213883097178642	0.199423321792874
617	0.185365544324962	0.0746564401281129	0.413881642191348	0.130698993679174	0.213911151748604	0.199494667366411
618	0.185847130796918	0.0747781007989106	0.414074471123733	0.13092431337656	0.213935146755117	0.199562370412948
619	0.18632815467783	0.074900661828357	0.414264302582992	0.131150139988507	0.213957929164756	0.19962898543194
620	0.186803649168153	0.0750240570190862	0.414432549347639	0.131375815123612	0.213971207604969	0.199684981311475
621	0.187277573821749	0.0751472143502652	0.414597106138039	0.131601146935845	0.213983188253333	0.199737999988689
622	0.187742940244067	0.0752684860382527	0.414744571191607	0.131824234479979	0.213989831231309	0.199774834656578
623	0.188205959732774	0.0753891356313396	0.414891142422647	0.132046894199027	0.213998193987144	0.199804829497032
624	0.18866375540151	0.0755084005615833	0.415035724177735	0.132268601662239	0.214010384635631	0.199819600205455
625	0.189116994793793	0.0756266857751208	0.415187877607752	0.132488911310818	0.214027753380748	0.199824845612308
626	0.189565677909624	0.0757439912719521	0.415347602712697	0.132707823144764	0.214050300222493	0.199820565717591
627	0.190010972434001	0.0758605838975611	0.415521623203101	0.132925272461383	0.214076338832263	0.199807886816721
628	0.190454672327105	0.0759768410543597	0.415702370933722	0.133142033534553	0.214104020626987	0.199791255442368
629	0.190893683717931	0.0760916956989951	0.415876356508921	0.133355947987951	0.214127640933765	0.199767007048537
630	0.19133133427557	0.0762060952609795	0.416047085979373	0.133569049424497	0.214150106691511	0.199741015527263
631	0.191757630649224	0.0763161862553322	0.416176864963621	0.133775508201995	0.214163198294339	0.199705464202959
632	0.192182719485704	0.0764256615166138	0.416299717827521	0.13398119349929	0.214174253737858	0.19966828528547
633	0.192603765697733	0.0765330754106576	0.416399383245042	0.134184289319382	0.214178492474125	0.199625657469058
634	0.193026936877603	0.076641420711991	0.416507573925583	0.134388652057117	0.214181856696814	0.199584203170684
635	0.193453165938022	0.0767511063311315	0.416628032667542	0.134594837920243	0.214183962473136	0.199544437593389
636	0.193881085448751	0.0768625275989004	0.416767797611459	0.134802597264207	0.214187679420326	0.19951071353287
637	0.194310131926352	0.0769751059657549	0.41692043335668	0.135011405595398	0.214192470481429	0.199481017150202
638	0.194742809384158	0.0770895248297772	0.41707952692363	0.135222499423527	0.214200908559576	0.19945469908026
639	0.195176510964586	0.0772044628083854	0.417240441927479	0.135434237878997	0.214210375283558	0.199429333867753
640	0.195606861642691	0.0773189191846952	0.41739156821345	0.135645301979641	0.214223926265509	0.199391993512335
641	0.196035102987596	0.0774329735994058	0.417540815601676	0.135855764055074	0.214237772987144	0.199349937447482
642	0.196452814423009	0.0775449959140318	0.417681788181957	0.136063174993906	0.214252509176517	0.199285068325622
643	0.196865409855688	0.0776561819173994	0.417820481122963	0.136269262620318	0.214266114827685	0.199208648485714
644	0.197268074224234	0.0777657444930302	0.41795474888185	0.136472781463798	0.214277525904688	0.19910980666371
645	0.197659476541633	0.0778736350219683	0.418089657805283	0.136672753401279	0.214288922335499	0.198994881415043
646	0.198040891757071	0.0779800427925186	0.418225135308599	0.13686957996929	0.214300305778177	0.198865693504996
647	0.198415295951828	0.0780868217270474	0.4183689220593	0.13706471782953	0.214315593864279	0.19872092813161
648	0.19878683649025	0.0781937522637645	0.418516102727947	0.137259165935891	0.214332476804737	0.198569800132354
649	0.199155822866085	0.0783019237649305	0.418665922968855	0.137452860883834	0.214357291881926	0.198407512982046
650	0.199524218525055	0.0784102034122463	0.418814459470222	0.137646398558622	0.214383698211617	0.198242698663397
651	0.199889510871481	0.0785181823673627	0.418947050493077	0.137839192168005	0.214417282459286	0.198064868688864
652	0.200250184501371	0.0786249918138668	0.419072354184193	0.138030629556143	0.214452031589757	0.197881626735933
653	0.200598981431597	0.0787287939525106	0.419178919022267	0.138218579518222	0.214489776133146	0.197684468267118
654	0.20093738150305	0.0788304471451424	0.41927884707269	0.138403861473391	0.214527942915837	0.19747682071206
655	0.201263576566379	0.0789295776620212	0.419370984111525	0.138586011420447	0.214566605370751	0.197256859881847
656	0.201573168253396	0.0790264537067589	0.419460988731214	0.138763281001545	0.214603775556044	0.197025021109765
657	0.201873819660861	0.0791221158049591	0.419549845125209	0.13893792269328	0.21464014221154	0.196786786522831
658	0.202154607223634	0.0792170841434452	0.419632470666161	0.139106818339554	0.214673234086217	0.196531771005623
659	0.202430872456079	0.0793118544340067	0.419713593079092	0.139274376168271	0.214705548349259	0.19627275243635
660	0.202683251733993	0.079404493853882	0.419784488495196	0.139434066239456	0.214732888327533	0.195987651071698
661	0.202930695482068	0.0794961286789935	0.41985544391504	0.139591918826941	0.214759408943431	0.195696145797935
662	0.203160640533442	0.0795842017590334	0.419926612075416	0.139743256699486	0.214783024547271	0.195381935755506
663	0.203383445883925	0.079670772811238	0.420005196050256	0.139892119706092	0.214807483477313	0.195056230201791
664	0.203595977030687	0.0797551824087529	0.420094451562983	0.140037421320249	0.214833155974329	0.194713982326958
665	0.203798879011376	0.0798383398528927	0.420200573200382	0.140179223483011	0.214861206725462	0.19435688221442
666	0.203995361548015	0.0799206625281156	0.420317938920896	0.140318692678175	0.214890842979341	0.193989880610078
667	0.204177212217807	0.080001494524976	0.420463840707391	0.140452472354258	0.21492461665172	0.193608702950278
668	0.204355173404008	0.080081930265563	0.420617328030413	0.140584739626534	0.214959490144207	0.193223756971939
669	0.204515439287287	0.0801586760184669	0.420801221898875	0.140709546674956	0.21500011033128	0.192828902628525
670	0.204672896149986	0.0802344311128194	0.420988822782921	0.140833230412165	0.215042526724584	0.192432676619863
671	0.204818401540232	0.080305717132321	0.42119149292159	0.140952173083208	0.215093140230841	0.192030740925407
672	0.204958995278803	0.0803750273019004	0.42139575640039	0.141069672739064	0.215148419962567	0.191622973067754
673	0.205090857192173	0.0804408248493961	0.421602852483866	0.141184607034588	0.215211995206239	0.191204836919969
674	0.205211538264174	0.0805038931919071	0.421800044435084	0.141295905507362	0.215280310894042	0.190775647409998
675	0.205323434389385	0.080564817159073	0.421989454568099	0.14140434726226	0.215352351216519	0.190337773115452
676	0.20541591912743	0.0806248588568402	0.422146936658643	0.141507199819211	0.215422461267581	0.18988326813656
677	0.205501933403086	0.080684606464808	0.422293776068363	0.141608189310181	0.215491927894838	0.189423219596219
678	0.205558186387266	0.0807449117041349	0.422388878332631	0.141700570521956	0.215551599084982	0.188943365717871
679	0.205608458247115	0.0808052184704727	0.422475410638064	0.141791213723412	0.21560953470008	0.188458799099231
680	0.205631415671096	0.0808652972534431	0.42252669062481	0.141873902811406	0.215660039615864	0.187951153590517
681	0.205646080164044	0.0809246666598732	0.422576049117215	0.141953949464742	0.215710746934377	0.187435970879337
682	0.205643907493988	0.0809825958169637	0.422621506393836	0.142028631174984	0.21576186519176	0.18690548536315
683	0.205630938990237	0.0810381788710088	0.422676644849795	0.142098708142098	0.215814708884579	0.186363621595273
684	0.205608005101537	0.0810915962914735	0.42274071977899	0.142164534577093	0.21586914528703	0.185811254825835
685	0.205569661891134	0.0811404618831545	0.422821443750512	0.142221907830369	0.215922462315038	0.185244044546122
686	0.20552502473243	0.0811874682771633	0.422908968035097	0.142275828375619	0.215975322133766	0.184670771424184
687	0.205457482845874	0.0812261528388124	0.422995273609208	0.142316113896854	0.216018873941606	0.184081147314841
688	0.205384894307506	0.0812631908854816	0.423079905700416	0.142353743977816	0.216060809962811	0.183487070173961
689	0.20528727362763	0.0812928176426199	0.423150561231743	0.14237961176605	0.216096489056855	0.182867469924862
690	0.205181514188487	0.0813203382418691	0.423219325047659	0.14240158436334	0.216132175586145	0.182241845789511
691	0.205056764311055	0.0813429444727106	0.423283674860948	0.142414468181763	0.216167879464343	0.181602165919574
692	0.204917736755701	0.0813622850838635	0.423355124755409	0.142420024068048	0.216205087869478	0.180951024013135
693	0.204763848760059	0.0813782267847282	0.423433964530275	0.142417952922924	0.216243862210812	0.18028795223197
694	0.204590294836209	0.0813885993419037	0.42352121325537	0.142404579093333	0.216280380307496	0.17961253856494
695	0.204407905495338	0.0813964698200305	0.423612239914625	0.142386127246081	0.216315884729048	0.178931579992666
696	0.204200379310796	0.0813979315195377	0.423698874163108	0.142355114026443	0.216346082894252	0.178225369673615
697	0.203987426975036	0.0813979962535459	0.423782853630182	0.142321426401337	0.216375012810458	0.177513671707757
698	0.203751493041482	0.0813920460144246	0.42384319120977	0.142276681629139	0.216397679037909	0.176778465133801
699	0.203508744065569	0.0813839119853935	0.423894463598675	0.1422280983009	0.216417829363336	0.176037294463486
700	0.203248470695016	0.0813701624965946	0.423922425497255	0.14216964439998	0.216431510226412	0.175280787545395
701	0.202972382119567	0.0813505149308896	0.423936367656056	0.142100958689419	0.216437474793404	0.174509333522891
702	0.202678459376893	0.0813242163422904	0.423934500321066	0.142020734980752	0.216434738005235	0.173721024254984
703	0.202360269096199	0.0812886918765389	0.423921341579918	0.141924065991452	0.216419945562064	0.172917220999143
704	0.202030126147524	0.0812486233220408	0.423902621399915	0.14181929708781	0.216399215258968	0.17210578637611
705	0.201670859253043	0.0811977759762387	0.423882090210793	0.141696298690206	0.216368834492801	0.17128379986112
706	0.20130527832642	0.0811446742158312	0.423861925994381	0.141569541018712	0.216336791837646	0.170459009259746
707	0.20090895660844	0.081081486402417	0.423851750582517	0.141426563231779	0.216301304618727	0.16961498991035
708	0.200506026103451	0.0810161088333206	0.42384366452314	0.141279827784962	0.216265264830406	0.168765865718221
709	0.200084285973898	0.080944498882667	0.423841525082381	0.141122397460014	0.216227652344556	0.167902212358315
710	0.199652227459115	0.0808694168653935	0.423838727406388	0.140958929656422	0.216189437308104	0.167027803356066
711	0.199208056057323	0.080790258943827	0.423835157019469	0.140788374377901	0.216150514929641	0.166140768164979
712	0.198750026550146	0.0807062281577365	0.423835702382495	0.140611556123786	0.216116532089134	0.1652392714589
713	0.198284858018985	0.0806196871081032	0.423838367980342	0.140431511488304	0.216085093859088	0.164330324881463
714	0.197803920741356	0.0805291075214747	0.423856849568506	0.140247552692222	0.216070028925675	0.163410312041836
715	0.197319243545832	0.0804377866071892	0.423878023803122	0.140062682984825	0.21605867200787	0.16248807343543
716	0.196816190718686	0.0803451513942743	0.423901045926615	0.13987352496014	0.216063649081931	0.161559187740652
717	0.196305586693575	0.0802519397705614	0.423915870996895	0.139681320341934	0.216067993253446	0.160627152946984
718	0.195773490797338	0.0801570875930392	0.423907365992645	0.139480444649859	0.216070536086945	0.1596861553334
719	0.195224300165123	0.0800594452194361	0.423877614293908	0.139271035847944	0.216063393777295	0.158734383285549
720	0.194655041799369	0.0799585273982598	0.423822920823383	0.139051609917086	0.216044881951773	0.157769962988778
721	0.194062862825802	0.0798525974386726	0.423751876468097	0.138820319042623	0.216014330462968	0.156787187316265
722	0.193458876266391	0.0797440854683888	0.423672408929752	0.138582915924483	0.215977576723382	0.155794955844127
723	0.192832159560495	0.0796312618560428	0.423602947903855	0.138335585845319	0.215939619991168	0.154782293349891
724	0.192200248666256	0.0795176047271852	0.423536308160166	0.138086224174449	0.215901894133554	0.153765199948031
725	0.191544932838326	0.0794018855314171	0.423488348019159	0.137830351831788	0.215870853408806	0.152730796018745
726	0.190882220634576	0.0792856204315535	0.423438222083957	0.137572599218862	0.215840052900489	0.151692804914224
727	0.190198457207338	0.0791678016046488	0.423381931965278	0.137309495067488	0.215809936085089	0.150644604157109
728	0.189500205022824	0.0790489615269009	0.423305940814182	0.137042362383288	0.215777732879308	0.149588146391308
729	0.188784944297159	0.0789289225894674	0.423206822364162	0.136770500551858	0.215743080432644	0.14852199561531
730	0.18805566708372	0.0788089025977171	0.423074828722215	0.136495471771807	0.215707370322243	0.147452615181146
731	0.187319486227049	0.0786888919374227	0.422926642821557	0.13621888315139	0.215671139272987	0.146381644019827
732	0.186564424350543	0.0785691520336379	0.422740512982125	0.13593866764985	0.215638576676145	0.145307342695061
733	0.185805014642617	0.078449304564193	0.422546104441633	0.135657528546784	0.215606684042411	0.144232812712995
734	0.18502532389851	0.078327490496429	0.422317034573911	0.135371318900753	0.215576409655877	0.14316185596803
735	0.184238296088346	0.0782044013505653	0.42208342931239	0.13508249170986	0.21554560115779	0.142091342873291
736	0.183431431025506	0.0780778647713211	0.421837561689855	0.134786587453229	0.215513348580319	0.14102202927731
737	0.182616101672977	0.077949611467355	0.421597712970556	0.134487199005355	0.215481501646973	0.139957069905528
738	0.181791602673286	0.0778194983782735	0.421364384729764	0.134184036016969	0.21545009416143	0.138896827609962
739	0.180951961801212	0.0776868333794032	0.421145704296197	0.133875364767391	0.215422565639745	0.137833391601327
740	0.180105195342135	0.0775529674818088	0.420933916948384	0.1335641013949	0.215396862512816	0.136768452668896
741	0.179253065005285	0.0774189315307186	0.420734610268469	0.13325202210665	0.215374097190684	0.135714108833257
742	0.178399338207422	0.0772850719280435	0.42053764940926	0.132939753762888	0.215351698725	0.134661597995554
743	0.177536172587957	0.0771532079175814	0.420348810464322	0.132626593497884	0.215329338246539	0.133614380239491
744	0.176672298773749	0.0770228744651757	0.420162886810872	0.132313968838044	0.215306588243119	0.132571028706483
745	0.175806772505137	0.0768961123149015	0.419983765504226	0.132002593923585	0.215282929348125	0.131536698360604
746	0.174935410257335	0.0767715949516981	0.419804075827156	0.131690261427488	0.215260868269025	0.130500463242372
747	0.174058212030343	0.0766493223755655	0.41962381777966	0.131376971349752	0.21524040500582	0.129462323351786
748	0.173183036356367	0.0765306808649452	0.419449065754143	0.13106526377456	0.215227891260849	0.128435187139298
749	0.172308686795595	0.0764135224655905	0.419276562667181	0.130754202573648	0.215218624502199	0.127412545386878
750	0.171433260826808	0.076297241006778	0.419132965877472	0.130441951094546	0.215223651541006	0.126407865303153
751	0.170558962278956	0.0761805746058667	0.418996083448234	0.130129508366839	0.215231235821626	0.125409586430312
752	0.169693712176153	0.0760604492734202	0.418887474655653	0.129816526428053	0.21524720627884	0.124445222626291
753	0.168829867177558	0.0759381656717897	0.418779105592722	0.129502756439644	0.215264365594335	0.123490937915984
754	0.167969008025404	0.0758112957481431	0.418671245955295	0.129187311845789	0.215284051233676	0.122558071279817
755	0.167118230147292	0.0756862502042614	0.418558053648496	0.128876256585709	0.215307928591933	0.121651235693448
756	0.166276392266916	0.0755628225065863	0.418440132370744	0.128569093753693	0.21533552313489	0.12076748424558
757	0.165447953572489	0.0754513125961688	0.418320005849426	0.12827152318778	0.21537065795361	0.119924776001036
758	0.164624222700152	0.0753439900164093	0.418199104512801	0.127977322877526	0.215408442058409	0.119096488341444
759	0.163797784291552	0.0752508974663605	0.41804504322106	0.127684478725796	0.215435266911549	0.118297888232017
760	0.162965281257809	0.0751586858599254	0.417877685904993	0.12738875364537	0.215456344611313	0.117498027729183
761	0.162099219525733	0.0750672222233524	0.417644874262258	0.127076298833997	0.215448123657356	0.116682170815407
762	0.1612188019735	0.0749717306691605	0.417380929021	0.126754547096142	0.21542412599319	0.115855499746661
763	0.16031286296321	0.0748690783725351	0.417061635160142	0.126416267488986	0.215372080844208	0.115009603513523
764	0.159394796605835	0.0747591248426568	0.416709610358142	0.126067624344665	0.215300685849902	0.114154306719169
765	0.158467581548029	0.0746436633648859	0.416332893793526	0.125711163093361	0.215214693603861	0.113291918273372
766	0.157544786177342	0.074526324782053	0.415936998649159	0.125354151974332	0.215117088563939	0.112435632231955
767	0.156623237385072	0.0744084567593309	0.415535694161787	0.124996985764407	0.215016208120615	0.111581067381517
768	0.155726413379141	0.0743004170731673	0.415127843818417	0.124653700836057	0.214917281420807	0.110754454449079
769	0.154836161756427	0.0741953978353508	0.414723435333268	0.124314365499194	0.214820922194878	0.109936042880127
770	0.153971200685317	0.0741020632864152	0.414333058760034	0.12399026766842	0.214734753925341	0.109149307394697
771	0.15311714536914	0.0740136837887884	0.413958003177407	0.123672769554641	0.214654034999311	0.108376945958694
772	0.152278783700306	0.0739324347308497	0.413604994873946	0.123364768594586	0.214581157811499	0.107625269130405
773	0.151453737359636	0.0738583131168227	0.413266090357838	0.123065634650763	0.214512180925739	0.106890314333646
774	0.150636852026551	0.0737885599361609	0.412935830098495	0.122771935329792	0.214445594547688	0.106165608523955
775	0.149837637512587	0.07372926163949	0.412593642518904	0.122489342399606	0.214379917447393	0.105462995320235
776	0.149043062111217	0.0736725950004766	0.412248480715141	0.122209513974332	0.214314613950943	0.104766144674573
777	0.148272961626571	0.0736276954624923	0.411890568213935	0.12194143839655	0.214253807244077	0.104098995624248
778	0.147510317814829	0.0735857896100733	0.411541483119103	0.121677188179071	0.21419745341713	0.103440381898919
779	0.146770044021801	0.0735528648143503	0.411218880243397	0.1214244140425	0.214154458229938	0.102807374148573
780	0.146041329147538	0.0735245880064989	0.41091811614012	0.121179418847031	0.214119015418743	0.102188109545497
781	0.145326183438782	0.0735017675322358	0.410642988856649	0.120943555451986	0.214092438440238	0.101584978202258
782	0.144628457156967	0.073481693789073	0.410372948113337	0.120717140175528	0.214067620977714	0.101005256336953
783	0.143938928252536	0.0734629126252515	0.410105301035982	0.120495171072523	0.214043631522709	0.100436550696558
784	0.143267051003767	0.0734465858827634	0.409799061559525	0.120281181661469	0.21401243509234	0.0998956791372297
785	0.142599943692519	0.073431583450879	0.409481905476856	0.120069704369851	0.213979581079575	0.0993614836322493
786	0.141956130831196	0.0734257696154173	0.409109428562009	0.119871959866601	0.213939825573123	0.0988564111104897
787	0.141321217805717	0.0734255124627059	0.408725264054858	0.119681200051279	0.213899171533003	0.098359765699496
788	0.140706114092277	0.0734376234103098	0.408315085229353	0.119505986799413	0.213856517530844	0.0978818774060133
789	0.140109300099834	0.0734569305867541	0.407909716226331	0.119341985597115	0.213816474854021	0.0974168509801372
790	0.139528705293935	0.073482619324623	0.407508612537589	0.119187927155754	0.213778747880797	0.0969632303613839
791	0.138963058756799	0.0735074442851465	0.407123728069935	0.119037352221226	0.213744663739517	0.0965154168502112
792	0.138402664314093	0.0735319657563325	0.406744542247529	0.118888001221531	0.213711859512163	0.0960696436741342
793	0.13785282773592	0.0735514226081268	0.406363267826438	0.118735918797463	0.213680582289204	0.0956247245378443
794	0.137308058950284	0.0735725739748371	0.405979365711795	0.118585857975766	0.213650103437076	0.0951835112399988
795	0.136785319904819	0.0736032999961362	0.40558317096854	0.11844636921339	0.213623130125	0.0947601716942419
796	0.136279970319166	0.0736475664413373	0.405190744361452	0.118321008633747	0.213604258064959	0.0943544194035489
797	0.135802993010049	0.0737139251571155	0.404804465766003	0.118218699299616	0.213598603837185	0.0939773621079601
798	0.13537619161102	0.0738083748056933	0.404455241868529	0.118152275963176	0.213617994906571	0.0936442581578994
799	0.134982840818717	0.0739215517428041	0.404130721103038	0.118109776625198	0.213654082840731	0.0933404564381908
800	0.134673847643367	0.0740615383478673	0.40387247501716	0.118114449633867	0.213723567257152	0.0931005603419325

## Sheet: K9
wl	K1	K2	K3	K4	K5	K6	K7	K8	K9
330	0.141118181563289	0.136388331036226	0.17122242817652	0.148005985700463	0.162502514291324	0.134282935688456	0.167497968163221	0.126067010753503	0.143858588253174
331	0.136670145449577	0.132111857157536	0.167371415690397	0.143919790747974	0.158479724197631	0.129573854633284	0.163872040161341	0.12162087681621	0.139353720548463
332	0.131011926654615	0.126655710847178	0.162470690085893	0.138708252565609	0.153376669809451	0.123605760412371	0.15925327809805	0.115949818384476	0.133631754856446
333	0.124757647733067	0.120618531846595	0.157052941602188	0.132942440852111	0.147741544947867	0.117017555229227	0.154145508213468	0.109675438933093	0.127310322991577
334	0.117690644381032	0.113864579709682	0.150823599096581	0.126420920693148	0.141262882970012	0.109647784974523	0.148265634663737	0.10272279864179	0.120160952096717
335	0.110420459921375	0.106931434288687	0.144391358085498	0.119710473422817	0.13457333671309	0.102082623451929	0.142192735197718	0.0956005931405086	0.11280459644436
336	0.102981099214611	0.0999905979515409	0.137628638108384	0.112887632116282	0.127511996491044	0.0944504635158596	0.135811712357325	0.0885921710208036	0.105253075383537
337	0.0955618263593561	0.0930881357396991	0.130862682887945	0.106092590099322	0.120443662275804	0.0868513525050954	0.129430224829112	0.0816380860420727	0.0977185635174036
338	0.0886567577487128	0.0867959373741568	0.124435746775934	0.0998656066223123	0.113704179208517	0.0798490132883986	0.123404799808827	0.0754011082700068	0.0906806703228438
339	0.081981088140818	0.0807255287934619	0.118207937329932	0.0938624036815071	0.107173030484121	0.0730828555416883	0.117575814431273	0.0693989245380942	0.0838720477675094
340	0.0762833827025355	0.0756006450850114	0.112829036302182	0.0888132125003122	0.101530043958364	0.0673235766933418	0.112584282267462	0.0643977048720986	0.0780408421478201
341	0.0710772711938143	0.070928411217286	0.107891800801302	0.0842077730023066	0.0963539144433564	0.0620615714420302	0.108011411098854	0.0598672521183753	0.0727061835169404
342	0.0669157967854107	0.0672180582611017	0.103893104545018	0.0805453058310784	0.0921698560761917	0.057856272584418	0.104328194545053	0.0563371790532306	0.0684266872372812
343	0.0633630387759228	0.0640610358240108	0.100455010229624	0.0774101476704395	0.088576946647056	0.0542681414498657	0.1011609042397	0.0533773116026769	0.0647687034328888
344	0.0605542674762209	0.0615803062435895	0.0977020960642055	0.074919478300521	0.0857065525866224	0.0514343264212758	0.0986241904602252	0.0511143621255121	0.0618703459871559
345	0.0583428423271322	0.0596391319376212	0.0955186336645826	0.0729521008833097	0.083436311202927	0.0492078823336552	0.0966114573301252	0.049387667568634	0.0595891425821393
346	0.0565465221301646	0.0580729028223746	0.0937308919835634	0.0713483670264543	0.0815831250691683	0.0474035095778948	0.0949628463462006	0.0480336247360228	0.0577368089342308
347	0.0552096593432888	0.0569167688707338	0.0923888243720283	0.0701537977805388	0.0801966948702014	0.046064890452249	0.0937226564807087	0.0470664425359875	0.0563589737982832
348	0.0540514744381155	0.0559201163716064	0.0912200744541815	0.0691183481055442	0.0789917808680979	0.0449073977383145	0.0926412970501627	0.0462497061375095	0.0551656658614314
349	0.0532151662885504	0.0552024821091034	0.0903770390652534	0.0683691563022209	0.0781161668348763	0.0440729670448651	0.0918501287494756	0.0456741580149981	0.054303231524579
350	0.0524356599193869	0.0545340863589459	0.0895914827108403	0.0676704805938983	0.0772986645608692	0.0432955472962072	0.0911101706481754	0.0451411725294219	0.0534991866465501
351	0.0518913421184758	0.0540661600928748	0.0890572780242994	0.0671717856113154	0.0767244981315589	0.0427509618688879	0.0905907103617059	0.0447618390115257	0.0529344132178266
352	0.0513742328314226	0.0536222753604224	0.0885518827905706	0.0666961810601403	0.0761789718273687	0.0422328168231468	0.090097915663767	0.0443989840747536	0.0523969747865228
353	0.0510214543568679	0.0533246929721275	0.0882201396210487	0.0663599772510833	0.075807055497983	0.041873721956127	0.0897676689420858	0.0441339765336481	0.0520241836704144
354	0.0507087729196742	0.0530647314422848	0.0879299884999593	0.0660619291613485	0.0754789300046665	0.0415524569179806	0.0894786678348691	0.0438923164573852	0.0516915551179347
355	0.0505163825945632	0.0529176324877989	0.0877646135241677	0.0658783482295805	0.0752821770195575	0.0413446813664542	0.0893134035710464	0.04372069877565	0.051479414256341
356	0.050378935426165	0.0528218902111552	0.0876638719177022	0.0657525575928808	0.0751509485008253	0.0411885388008318	0.0892101467245204	0.0435814149655204	0.0513245671088908
357	0.0503311323555615	0.0528099404088855	0.0876685847559266	0.0657210563849766	0.075126628321971	0.0411166395280001	0.0892080598746365	0.0434948864195897	0.0512631991792537
358	0.0503462947388908	0.0528528107618072	0.0877675099963174	0.0657574991317186	0.0751847205861472	0.0411038936956838	0.0892867694442739	0.0434452532631289	0.0512699512195006
359	0.0504195790796966	0.0529462843349055	0.0879534005310157	0.0658566593750571	0.0753188858746594	0.041145751039228	0.0894400603242386	0.0434296773892557	0.051339583231948
360	0.0505415236834322	0.0530806757956702	0.0882362993611532	0.0660082987065401	0.0755184691891663	0.0412328975919836	0.089659493218252	0.0434428418814473	0.0514623695666343
361	0.0506896699672071	0.0532370999651785	0.0885714334272964	0.0661881960085624	0.0757532775945935	0.0413444306420071	0.0899145410429068	0.0434714819553662	0.0516137774594492
362	0.0508625059530241	0.0534168768593403	0.0890005786118687	0.0664036757584672	0.0760291492758548	0.0414777320084745	0.0902109305789931	0.0435130135111322	0.051793506737997
363	0.0510419050241941	0.0536028614398025	0.089454714093745	0.0666286141337585	0.0763159365114519	0.0416168198894397	0.0905183096839409	0.0435579719165031	0.0519807644861701
364	0.0513135406968453	0.0538783474130789	0.0901378186753089	0.0669658887333272	0.076730056127582	0.0418388814312862	0.0909518746447049	0.0436679035098516	0.052266676219535
365	0.0516074855046198	0.0541749352445608	0.0908686970500305	0.067328284707945	0.0771721624615751	0.0420812710596678	0.0914131383859359	0.043794617873409	0.0525758708274124
366	0.0521252844360051	0.054680189420907	0.0920361025991406	0.0679312111368527	0.0778792600744032	0.0425290974622751	0.0921364443190247	0.0440957481054591	0.0531154322865932
367	0.052694162874219	0.0552333512383165	0.0933132630706001	0.0685886436579728	0.0786411726653491	0.0430243359507628	0.0929161065799068	0.0444387948111374	0.0537062559407319
368	0.0534808013152287	0.0559907508939429	0.0950583261057601	0.0694784442564197	0.0796367701630081	0.0437216996474779	0.0939360247645388	0.0449605380622839	0.0545156184260068
369	0.0543031812796779	0.0567826867044096	0.0969638274013051	0.0704174079432273	0.080667763741151	0.0444517612910421	0.0950033398675606	0.0455141945954993	0.0553597638985636
370	0.0551981273674737	0.0576447413747034	0.0991950669830862	0.0714561875973127	0.0817706220887611	0.0452482096751786	0.096166885077616	0.0461326447620059	0.0562745293756018
371	0.0560771223468599	0.0584937312225218	0.101627057494583	0.0725137252017147	0.0828630656174964	0.0460261473119528	0.0973502119788243	0.0467415726979598	0.0571730077004646
372	0.056937392112026	0.0593273841048254	0.104294712140965	0.0735932830086624	0.0839432830545091	0.046782354940954	0.0985567608652989	0.0473393223632647	0.0580523663249478
373	0.0577616322960471	0.0601304552339373	0.10722450901387	0.0746906070420768	0.0850058311760285	0.0474973488797395	0.0997885207071408	0.0479144194371374	0.058896676773698
374	0.0585618527593048	0.060913138527588	0.110329067371124	0.0757997752264688	0.0860565997538858	0.048184867025048	0.101037087852561	0.0484744147833886	0.0597176217719596
375	0.0593447890534175	0.0616941373762488	0.113740613715228	0.0769511552367069	0.0871122081658282	0.0488464002539213	0.102333870683061	0.0490356479296608	0.060520255052521
376	0.0601216525313441	0.062474544392886	0.11726002070336	0.0781173664289989	0.0881695170600166	0.0494988036472904	0.10364759415967	0.0495973159786432	0.061316454486323
377	0.0609006551677278	0.0632864791869907	0.12111844891328	0.0793522119706227	0.0892525149665387	0.0501401655454231	0.105033034423832	0.050180128888767	0.062111328372112
378	0.0616800718680793	0.0641036331915747	0.125030485177833	0.0805980979413357	0.0903395401689022	0.050779840162038	0.106429829920419	0.0507664366623034	0.0629060418773202
379	0.0624688361089141	0.0649710953600396	0.129234542846032	0.0819216713621055	0.0914452474426366	0.0514158118896394	0.107889879569865	0.0513859377954259	0.063704486673896
380	0.0632613670536867	0.0658475769950738	0.133472628134133	0.0832584177017107	0.0925535630497764	0.0520538591868096	0.109358539627176	0.0520131333022574	0.0645055538407123
381	0.0640752426541072	0.0667751689406674	0.137903536601675	0.0846698105813833	0.0936766592128808	0.05270366804487	0.110875991995724	0.0526839302601065	0.0653214811055579
382	0.064897888962578	0.0677187554370586	0.142375429611284	0.0861053239189913	0.0948045742327498	0.0533599334270218	0.112408980443963	0.0533717832506788	0.0661443023158767
383	0.0657420083838614	0.0687015010060922	0.146947664085957	0.0875998907915442	0.0959442871433181	0.0540320061612592	0.113980005501101	0.0541013941144699	0.0669840018064923
384	0.0665840318962484	0.0696915523215441	0.151523778643211	0.089110358769921	0.0970832127958852	0.0546994520440022	0.115562014088074	0.054838708382583	0.0678213325241494
385	0.067423277110796	0.0706912879985271	0.156105036565749	0.0906419049583434	0.0982210948738924	0.0553607646584851	0.117158582237851	0.0555862341401462	0.068655523240443
386	0.068232399834885	0.0716736858789918	0.16062448934696	0.092163634202601	0.0993431611158749	0.055987965417343	0.118745787718034	0.0563110467161987	0.069461317353162
387	0.0690187985749437	0.0726430043691006	0.165097317196995	0.0936779576819625	0.100453296113137	0.0565894326710804	0.120325930131679	0.0570187247869009	0.0702456894666931
388	0.0697494130563415	0.0735664431530596	0.169421920167119	0.09515298787799	0.101527048509099	0.0571264909927554	0.121865301560928	0.0576705652296143	0.0709742613117489
389	0.0704572424180047	0.0744711423387322	0.173685980580659	0.0966119687047683	0.102585940405939	0.057637241440771	0.123388020052888	0.0582995987538534	0.0716800414978499
390	0.0710927188876105	0.0753065468154889	0.17774673673477	0.0980113954401059	0.103583005666161	0.0580636577879857	0.12484131703788	0.0588505453570045	0.0723102428502808
391	0.0717144138539673	0.0761287523000712	0.181768768268036	0.0993994785389786	0.10456829442417	0.0584740104969526	0.126281390878688	0.0593866182609007	0.0729260482343935
392	0.072229274329439	0.0768404838892847	0.185485655865896	0.100682375837636	0.105442685073481	0.0587692034921582	0.127604102911221	0.0598024585497886	0.0734319319019323
393	0.0727251230070473	0.0775344467044011	0.189126032380943	0.101942137430735	0.106292087419381	0.0590460342767129	0.128898586991009	0.0601983310434922	0.0739178296717703
394	0.0731083300934706	0.0781245836873677	0.192296049047234	0.103061433799076	0.106989406559661	0.0592157077474408	0.13002018993229	0.0604769940028709	0.0742849885207967
395	0.0734455192787479	0.078681479147083	0.195189792172403	0.104112231647377	0.107615179335344	0.059344771622771	0.131050543027678	0.0607105877609449	0.0746015292621944
396	0.0736582896942602	0.0791484993772669	0.197336573501205	0.104977829793347	0.108047511940083	0.0593640391846187	0.131834183576763	0.0608223277525287	0.0747812136385218
397	0.0737669337464574	0.0795451546358605	0.198789636863982	0.105671527889606	0.108320578446801	0.059291475587273	0.132395011482378	0.0608305400773689	0.0748457035643348
398	0.0737257374221766	0.0798405529841167	0.199244423153699	0.106117857621646	0.108364457153926	0.0590867647120635	0.132635206559585	0.0606897735647001	0.0747444258662369
399	0.0734863722557855	0.0799891731649594	0.198560686938824	0.106252780263323	0.108151281418074	0.0586970886433246	0.13250334266767	0.060327462137932	0.0744293810456026
400	0.0730848689458495	0.0800177021179183	0.1969454323111	0.106132915285613	0.107727788410694	0.0581560774162436	0.132067066891929	0.0597838866905374	0.073939435851984
401	0.0725198094212086	0.0799090918078711	0.194866550462635	0.105822894530257	0.107161815785222	0.0574409919821592	0.131420392883628	0.0590118746150111	0.0732811541356148
402	0.0718812681189467	0.0797388682057486	0.192579372326591	0.105427441469002	0.106531830577709	0.056647699295653	0.130679192133162	0.058137231590614	0.0725472429669954
403	0.0713979244583975	0.0796709074515019	0.192040123288893	0.105412474574752	0.106187526113699	0.0559574316501095	0.130363084335887	0.0573801029629828	0.0719875219094581
404	0.0709463682666328	0.0796238920998321	0.191858883825555	0.105475438582178	0.105901734573056	0.0552882655189801	0.130134043769989	0.056647043549147	0.0714634783445521
405	0.0709971487862276	0.0799708216404808	0.195009668606606	0.106443660799787	0.106222578875582	0.0550588218970186	0.130842957950387	0.0565155822984131	0.0714680069221251
406	0.0711087118512691	0.080368390470306	0.198470644037368	0.107511351077983	0.106599433764849	0.0548870549344908	0.13164519238014	0.0564691103624026	0.0715342125003138
407	0.0715520815452922	0.0810479657613332	0.203450634060414	0.109103157505392	0.107249445446055	0.0550385192627759	0.132919043300844	0.0569094484568215	0.0719328337414249
408	0.0719926406289472	0.0817332700895597	0.20823873712159	0.110677980430718	0.107857863935098	0.0551965313138232	0.134144954877469	0.0573699775916404	0.0723230155240158
409	0.0724252002830924	0.082434880139046	0.21248070036822	0.112204465696269	0.108347901800293	0.0553731791911939	0.135234423705556	0.0578879735337514	0.0726891773092798
410	0.0727685498317075	0.0830736840191244	0.216068789995382	0.113575308115226	0.108710948021827	0.0554763195542611	0.136131244079143	0.0583002401848298	0.0729581351963444
411	0.0729780842220275	0.0836182786450911	0.218676069193346	0.114712686264293	0.108883506777868	0.0554691986458731	0.136739091770978	0.0585539128993592	0.0730812872361101
412	0.0730786658911517	0.0840789074301175	0.220596773374576	0.115659810500571	0.108934981155258	0.0553658883600118	0.137137488815477	0.0586498984133466	0.0730909060066561
413	0.0730901044247519	0.0844708368907381	0.221955734360297	0.116451272444567	0.108887386495568	0.0551838776743997	0.137364517148519	0.0586168671268905	0.0730076339205679
414	0.0730157142402811	0.0847955201034576	0.222851159354161	0.117107759590772	0.10876381006903	0.0549188462894322	0.137448164914408	0.0584440716139991	0.072836516949708
415	0.0729027633274015	0.0850899912337866	0.223538329047337	0.117703605885796	0.108606096906662	0.054616515749682	0.137467395324041	0.0582084834776367	0.0726259334364145
416	0.072750994231898	0.0853448784853383	0.22403778525328	0.118244239046111	0.108427616756144	0.0542726895389487	0.137428637782893	0.0578970580851382	0.0723772126575722
417	0.0725918311968471	0.085592225950456	0.224501486509274	0.118774355418863	0.108245180988836	0.0539209593908855	0.137378834917788	0.0575711875009947	0.072121227637673
418	0.0724246322127089	0.0858262466661098	0.224878795933648	0.119302376854155	0.108062501187633	0.0535585366037907	0.137313733162312	0.0572302750114733	0.071857612689197
419	0.0722604174740964	0.086061990233745	0.225252702633372	0.119832483489281	0.107882706704877	0.0531995288863477	0.137251286244932	0.0568950232779141	0.0715973896407826
420	0.07211727175628	0.0863110837938456	0.225615636451105	0.120376831045054	0.107722254990551	0.0528648362419368	0.137208695808349	0.0565997094539847	0.0713609083093995
421	0.0719842357036787	0.0865718560498658	0.225985397110526	0.120929347019999	0.107569028243427	0.052541187201551	0.137175219000074	0.0563232166459059	0.0711349679881513
422	0.0718785331903632	0.0868642040392983	0.226373615527105	0.121503947980116	0.107435335666887	0.0522473967942699	0.137166382742406	0.0560976102880901	0.0709375274350457
423	0.0717901930733649	0.0871801729159611	0.226758056157518	0.122093244308709	0.107310588092013	0.0519728994423248	0.13716493395139	0.0559045648343939	0.0707573988027033
424	0.0717258295988999	0.0875287611130849	0.227137279845131	0.122702834241389	0.10719819313849	0.051725044881082	0.137173686900038	0.0557564844387676	0.0706011771085575
425	0.0716709053115807	0.0879004409557761	0.22733519494964	0.123305303495811	0.107082293702671	0.0514901484108259	0.137155971501073	0.0556275866772848	0.0704532639663259
426	0.0716233975284474	0.0882902642342702	0.22739065331028	0.123902177931602	0.106963640745047	0.0512654332977736	0.137117459543271	0.0555137609854862	0.0703118789720268
427	0.0715577464758823	0.088675798027339	0.226839389963304	0.124401938007607	0.106813751247813	0.0510379611564378	0.136970161368717	0.0553676675269989	0.0701531800726023
428	0.0714846847921408	0.0890595797770651	0.226040310707583	0.124862031654968	0.106651103163977	0.0508093629049581	0.13677842938732	0.0552083942764837	0.0699874092964363
429	0.0713330181770133	0.0893715717291796	0.2239686060813	0.12505148776028	0.106395978485191	0.0505411611797386	0.13633432994646	0.0549091599629794	0.0697477654033065
430	0.0711685554102649	0.0896718769700549	0.221689729883066	0.125196886591305	0.106125799476995	0.0502665123773988	0.135849147430804	0.0545871412903839	0.0694960956539268
431	0.0708887253840038	0.0898522119202981	0.218126049791406	0.125039088409435	0.105756078363903	0.0499242543035108	0.13508834997992	0.0540423823731346	0.0691389499461578
432	0.0706128440542164	0.0900307347879587	0.21469396503797	0.124903250825101	0.105401437008322	0.0495837161880812	0.134352298738631	0.0534945659532079	0.0687869106560296
433	0.0703593386711134	0.0901989891876512	0.212007587201138	0.124891856626801	0.105132247611974	0.0492529245039158	0.133756476018377	0.0529294236847755	0.068463807732532
434	0.070175671505043	0.0904154012363778	0.210305553938367	0.125080872739377	0.104959942773618	0.0489622584506934	0.133368597648473	0.0524589080872536	0.0682095293201036
435	0.0701549601787152	0.0907441811328507	0.210900324681741	0.125737512910663	0.10501370190391	0.0487652188696714	0.133465922762718	0.0522091880551892	0.0681158414335034
436	0.0702466000967366	0.0911482167143453	0.212852397908641	0.126667008353955	0.105195067484627	0.0486365417428244	0.133866100029706	0.052132625915416	0.0681306479325438
437	0.070475558202296	0.0916442314664221	0.216463396393186	0.127929993574144	0.105532396504751	0.0485914187266356	0.134636429927826	0.0522677011995544	0.0682780586807004
438	0.0707374382024498	0.0921370417788386	0.220356443678001	0.129216583917032	0.105888799256871	0.0485721583683206	0.135488052167857	0.0524673861288892	0.068457626042825
439	0.0710221961293555	0.0926276252772539	0.224445490976565	0.130519577819764	0.106258456636311	0.0485708703654771	0.136396165696336	0.0527119692862418	0.0686595395265205
440	0.0712250629262295	0.0930077627623214	0.227471649285047	0.131532312792329	0.106524060650061	0.0485320358746926	0.137085212743777	0.0528426030898745	0.0687864554782523
441	0.0713991571639032	0.0933490948913477	0.230124360110528	0.132443064897539	0.106753105373165	0.0484800093746316	0.137697290487071	0.0529332006340922	0.0688870209457808
442	0.0714722843445832	0.0935712434940839	0.231522066286133	0.133023998083407	0.106872491326179	0.0483794863127059	0.138035567879284	0.0528722415903048	0.068896960149243
443	0.0715306185891433	0.0937761692856742	0.232734069372227	0.133556476114331	0.106975868255	0.0482718979861237	0.138333417681759	0.0527893648604248	0.0688937103577839
444	0.0715334201538622	0.0939212807663954	0.233211908732164	0.133904369692977	0.107020308550429	0.0481385982778118	0.138473177158447	0.0526300247793036	0.0688427486625237
445	0.0715334697579142	0.0940659251355956	0.233638244811299	0.134244035086766	0.107059685013877	0.0480049679919829	0.138601208661146	0.0524704683195056	0.0687894703596173
446	0.0715217873191225	0.0942085781346269	0.233845014272285	0.134548622429323	0.107077473562032	0.0478699284020031	0.138679241958952	0.0523099894032431	0.0687263159925346
447	0.0715158530495862	0.0943658949817573	0.234042429461142	0.13486543171868	0.107090685919323	0.0477415511884198	0.138752641767656	0.0521696536406885	0.0686671774142841
448	0.0715210769909575	0.094551676945786	0.234221686357043	0.135205965963589	0.107095015082583	0.0476261068231358	0.13881704715634	0.0520684192941549	0.0686158341908256
449	0.0715390068567003	0.0947682991714335	0.234395095952444	0.135573976398333	0.107094709075396	0.0475239327881144	0.138876684164944	0.0520059125112409	0.0685737864459399
450	0.0715701612559727	0.0950170204448884	0.234562419582019	0.135970584500046	0.107089578707132	0.0474355707294888	0.138931358165709	0.0519837140088291	0.0685414135869157
451	0.0716179276509187	0.0953080185361385	0.234727256995757	0.136409607913082	0.107083378329189	0.0473633619612994	0.138982772783106	0.0520128783137163	0.0685227577248466
452	0.0716750382934311	0.0956227973373982	0.234890695913088	0.136872489938737	0.107076576070801	0.0473002394189803	0.139032353997358	0.0520709341977093	0.0685118176735648
453	0.071747682539438	0.0959801967451457	0.235049096897473	0.1373899557691	0.107070795578592	0.0472502093397692	0.139079041678138	0.0521827243929025	0.0685152763494697
454	0.071824455971184	0.0963489256812	0.235206158684493	0.137921931218436	0.107065286695113	0.0472036595355614	0.139124960191792	0.0523087983923389	0.0685225625351331
455	0.0719140248096444	0.0967571202485702	0.235359597256093	0.138518526201897	0.107062046772776	0.0471645035643734	0.139169296553717	0.0524838732050982	0.0685423636078982
456	0.0720046697343483	0.097169643547426	0.235512322752173	0.139123043290753	0.107058945089571	0.0471255474283846	0.139213119515926	0.0526648293945444	0.0685632618629493
457	0.072097648882449	0.0975984536840018	0.235660711990198	0.139761737468138	0.107055784112786	0.0470841422880913	0.139253230776367	0.0528705685707744	0.068586845355345
458	0.0721894305527158	0.0980268523259642	0.235808575481751	0.140402015471542	0.107051762592293	0.0470406892493546	0.139291776659876	0.0530779989595656	0.0686092568006861
459	0.072277619789481	0.098454016484086	0.235954861733885	0.141047044953001	0.107045159440677	0.0469910925152879	0.139325626412587	0.0532905029860402	0.0686281521048633
460	0.07236308065659	0.0988735651714642	0.236100311191773	0.141682550288367	0.107036476307242	0.0469395927262663	0.139357081351215	0.0534973847117482	0.0686443763526953
461	0.0724444489692149	0.099281690652727	0.236244505458293	0.142303769404593	0.107024673201078	0.0468852383548123	0.139384944068718	0.053695832986306	0.0686565940160096
462	0.0725214583286922	0.0996726789165319	0.236391201515135	0.142901516858032	0.107012113253661	0.0468298098977115	0.139413652538359	0.0538692585230265	0.0686642488487333
463	0.0725949012719577	0.100049645820599	0.23653994449133	0.143480060223738	0.10699893407249	0.0467735026432632	0.139443052987022	0.0540222109106073	0.0686681704564283
464	0.0726566475405792	0.100387211835003	0.236692039638055	0.144003701539953	0.1069851687192	0.0467127948997645	0.139473184417161	0.054110934530581	0.0686611826251384
465	0.0727136162942052	0.100708684528277	0.236845503981194	0.144504918075389	0.106971163943496	0.0466502897734143	0.139503614417199	0.0541734238651941	0.0686497388258123
466	0.0727511222949846	0.100968002124525	0.236999776459929	0.144918236856486	0.106954714625415	0.0465795388552656	0.139529565127321	0.0541344927018274	0.0686214466080913
467	0.072785209646698	0.101216365068878	0.237154093326398	0.145316058502842	0.106937838939286	0.0465073538906432	0.139554715470441	0.0540778688380918	0.0685902125143734
468	0.072794517897203	0.101381926364892	0.237299780439583	0.145596248548361	0.10691814974354	0.0464260898069025	0.139572818966665	0.0539041886866634	0.0685392665096851
469	0.07279921419904	0.101532692194425	0.237443098887717	0.145855448771369	0.106898157051079	0.046343092282738	0.139590440187059	0.0537152192425438	0.0684848127849508
470	0.072781393339733	0.101611221334671	0.237574852677068	0.146012169272713	0.106876682580529	0.0462516314906214	0.139605706766643	0.0534516020752852	0.0684132331329332
471	0.0727556437047564	0.101667322080609	0.237704365845343	0.146137123620012	0.106854310662385	0.0461559871713155	0.139620894554575	0.0531720627219617	0.0683353426967707
472	0.0727130454214816	0.101675762488639	0.237829117693831	0.146194574889966	0.106830031668102	0.0460514528567321	0.139635914910247	0.0528586887232501	0.0682440418443
473	0.0726667101575847	0.101669276272525	0.237955736496809	0.146227254042189	0.106807816531983	0.0459459075266647	0.139652085442524	0.0525503137842991	0.0681516661812297
474	0.0726163264980138	0.10164661954692	0.238084377833816	0.146233096733536	0.106787837242208	0.0458392669298232	0.139669501999456	0.0522473544934219	0.0680581261400098
475	0.0725773507741087	0.10163696766642	0.23822077629305	0.146247440836672	0.106779188382407	0.0457430302082282	0.139693804657601	0.0519880057850483	0.0679791459177451
476	0.072545074948928	0.101634953552094	0.238361730522479	0.146266777832444	0.106777193902114	0.0456529036990796	0.139722151533919	0.0517542696410021	0.0679087167002636
477	0.0725462999676208	0.101690315755063	0.238511842719804	0.146352799739464	0.106797450034007	0.0455906193248402	0.139767290764154	0.0516206879713116	0.0678741358444055
478	0.0725564302739256	0.101760929890478	0.238664389313659	0.146456548015298	0.106823620885595	0.0455357360244375	0.13981689378467	0.0515137296429056	0.067849084299865
479	0.0726197239709259	0.101939155678716	0.238829342685515	0.1466972904232	0.106876971727925	0.045520875456364	0.139891294579714	0.0515634287906494	0.0678758617802611
480	0.0726926990486295	0.102138299537164	0.238996440467747	0.14696504998538	0.106934823174714	0.0455129486653491	0.139970062813912	0.0516428575183632	0.0679118683430449
481	0.0728222658814124	0.102463886567371	0.239175710645363	0.147397265179356	0.107017566024394	0.0455444340854604	0.140073892470443	0.0518998577454646	0.0680011625266108
482	0.0729689967020964	0.102829294162711	0.23935666595168	0.147879505743217	0.107107711942998	0.0455875254557341	0.140184966301839	0.0522154101561008	0.0681066640740904
483	0.0731645788729609	0.103308037212656	0.239542417393532	0.148504126205985	0.107218928134689	0.045663649145701	0.140316658169387	0.0526976110891055	0.0682582942727086
484	0.0733877511490616	0.103852019882189	0.239724832526714	0.149207779613722	0.107342475190671	0.0457585805363425	0.140459294622956	0.0532859391512451	0.0684366788712089
485	0.0736506262595269	0.104489883955521	0.239902446630346	0.150025163356901	0.107483766661119	0.0458805766669789	0.140617680602748	0.0540269867406764	0.0686535637036858
486	0.0739460226236752	0.105206940731137	0.240072383799506	0.150941032126724	0.107641086157017	0.046025569429669	0.140789783226737	0.0549224077848551	0.0689044651689181
487	0.0742659525651633	0.105983739369879	0.240236529597045	0.151931196618402	0.10781049697036	0.0461879105288207	0.140972233494594	0.0559342859966502	0.0691810283044747
488	0.074617599398187	0.106841247784735	0.240407756373968	0.153034404842334	0.107999081166523	0.0463737671162912	0.141173095152739	0.0571441482614166	0.0694949874953301
489	0.0749809771362992	0.10772860776062	0.240581602143266	0.154179423761756	0.108194756887838	0.04656832121314	0.141380766503183	0.0584272375046791	0.0698227781038987
490	0.0753708169535856	0.10868480867765	0.240790231392749	0.155433866033502	0.108410572381295	0.0467852124334414	0.141610057730218	0.0599326861354766	0.0701866904537618
491	0.0757649898271721	0.109652031004992	0.241005063716049	0.156705821775908	0.108629766736015	0.0470058357735671	0.141842922657262	0.0614749290302072	0.0705565244291617
492	0.0761846617946399	0.110679564837528	0.241265591847259	0.158073519184779	0.108870313313366	0.047249771555864	0.142097425514663	0.0632406513569799	0.0709613297803457
493	0.0766088505766726	0.111714185393846	0.241532309128009	0.159451767201167	0.109115413349084	0.0474986137288692	0.142356195457471	0.0650394240988171	0.0713720437506273
494	0.0770511066169649	0.112777152845294	0.241823783006917	0.160872217647623	0.109378727218272	0.0477670814647072	0.142632033741906	0.0669703985009123	0.0718063921972996
495	0.0775012895005429	0.113844651357219	0.242119774489323	0.162299526664654	0.109652208359194	0.048044837135341	0.142917179838822	0.068931108848318	0.0722501267656965
496	0.0779655645499622	0.114920205087772	0.242423797266833	0.163739028696042	0.109943764649864	0.0483391046900561	0.143218873157923	0.0709446830984981	0.0727105477727147
497	0.0784358383839547	0.115987457998104	0.242729877577749	0.165171030734384	0.11024801198389	0.0486414484942199	0.143531495037717	0.072951548963895	0.0731781053324191
498	0.078911649557553	0.117047048612849	0.243037857150269	0.166596109702221	0.110563974127169	0.0489512472978747	0.143854204819689	0.0749522224741075	0.0736522504792187
499	0.0793823407979642	0.118077186818938	0.243340571118575	0.167989580231374	0.110885136893155	0.0492584962622269	0.144178182365772	0.0768842369477207	0.0741208820410145
500	0.0798506226580519	0.119093465068014	0.243640807155485	0.169368176201145	0.111208747011002	0.0495645453022014	0.144502756506732	0.0787839412864637	0.0745869189745734
501	0.0803015164911842	0.120061372972719	0.243926380213231	0.170693538173441	0.111528315717925	0.0498567724391087	0.144817497842058	0.0805485505089262	0.075032910256062
502	0.080749098319182	0.121020067478497	0.244209160322565	0.172008760336693	0.11184711463229	0.0501463668325746	0.145130366262025	0.0822874273282877	0.0754750833181087
503	0.0811730537698814	0.121918635492913	0.244478434988435	0.173257956034403	0.112160677550608	0.0504169402289311	0.145433574501851	0.0838390274026472	0.0758897720498195
504	0.0815937627068409	0.122808199078405	0.244747866601462	0.174496899671492	0.112473970337923	0.0506848635645109	0.145736583381081	0.0853608351406922	0.0763005813272763
505	0.081997427446666	0.123650489412048	0.245018122187066	0.175682019990324	0.112785844937472	0.050938874081013	0.146038545617189	0.0867262331130862	0.0766910234698995
506	0.0823960353775063	0.124476094503626	0.245292787506928	0.176845999384021	0.11309770060693	0.0511885375432539	0.14634159655028	0.0880374936751398	0.0770751491514628
507	0.082783897589254	0.125266243455815	0.245576823512089	0.177965054311805	0.113409516049941	0.0514289635151899	0.146646960964459	0.0892337122402201	0.0774458523532739
508	0.0831660735601079	0.126033332651841	0.245867859672854	0.179050606956625	0.113721902467417	0.0516643397454115	0.146954282232285	0.0903600577057307	0.0778092910764485
509	0.0835420894366602	0.126775440445356	0.246166479335525	0.180099865461565	0.114034907440563	0.0518942454221091	0.147263723424897	0.0914107073133742	0.078164859947767
510	0.083912120413648	0.127491226038832	0.246469973500642	0.181106955010903	0.114349615630026	0.0521184779680762	0.147575395549685	0.0923845302896976	0.0785125909805635
511	0.0842787848846307	0.128192205394785	0.246776209573384	0.182090324522714	0.114665281878666	0.0523395193780074	0.147888322573822	0.0933151382859034	0.0788559132291914
512	0.084633187643687	0.128853916453951	0.24707769165706	0.183011049524355	0.114979724582061	0.0525506747322318	0.148200000323657	0.0941505052361697	0.0791851555700062
513	0.0849847141987113	0.129506416431155	0.247378058607498	0.183917080134721	0.115293880281016	0.0527595111351176	0.14851138503384	0.0949635316941786	0.0795110952163956
514	0.0853225922005553	0.130113215485866	0.247665438875262	0.184750810788448	0.115610611910244	0.0529573091982942	0.148823976202521	0.0956740901833599	0.0798223538656185
515	0.0856583207524638	0.130712341322649	0.247950028431905	0.185572943172538	0.11592812615276	0.0531534924730138	0.149136750128452	0.096369100698272	0.080131586843508
516	0.085982489482306	0.131269574736498	0.248218629656287	0.186332420910482	0.116250344721787	0.0533411537864925	0.149450497411058	0.0969812680609277	0.0804303020576208
517	0.0863045937203435	0.131815933556906	0.248484207358156	0.187076742489192	0.116574969020295	0.0535273918855799	0.149764823266766	0.097571444829148	0.0807274203991669
518	0.0866216435129284	0.132335668372684	0.248742382642838	0.187783957609084	0.11690548320822	0.0537101455632269	0.15008056562903	0.0981077825558192	0.0810206291561533
519	0.0869367250705464	0.132842602928808	0.249004638516842	0.188474467676128	0.117238756351572	0.0538914311418585	0.150397814636993	0.0986152177194731	0.0813122060796727
520	0.0872494960914642	0.133334511093164	0.249271684647873	0.18914536746374	0.117575268268686	0.0540709932999067	0.150716832315991	0.0990887237874111	0.0816018673726005
521	0.0875617176955293	0.133818444984577	0.249555606802143	0.189804258799939	0.117915017852023	0.0542489044005654	0.151042274169147	0.0995338927580473	0.0818901504088163
522	0.0878736025602331	0.134297491418379	0.249849872325496	0.190455790117529	0.11825675181143	0.0544258035628241	0.151371653419367	0.0999616938303372	0.0821775887070472
523	0.0881842827125787	0.134773000551409	0.250159280135956	0.191095499168903	0.118597414377644	0.0546005030722862	0.151706390639675	0.100363407623585	0.0824614219251806
524	0.088494623074259	0.13524751198422	0.250472958847908	0.191731873734934	0.118937774756034	0.0547745821668571	0.152042639082316	0.100757763466335	0.0827442383258507
525	0.0887990558277358	0.135714959782788	0.250779454175495	0.192348950773353	0.119267123440308	0.0549451376636898	0.15237140348345	0.10111930834029	0.083018151589555
526	0.0891029559249485	0.136181614154372	0.251083294873388	0.192964094751057	0.11959506445886	0.0551154094385155	0.152698541132453	0.101475433810766	0.0832910617443712
527	0.089405062028799	0.136644856939437	0.251368716156905	0.19357181611771	0.119916305372336	0.0552848861237951	0.15301570386204	0.101801683515401	0.0835596471243555
528	0.0897065107117175	0.137104987318728	0.251648432400175	0.194175415928851	0.120236366184485	0.0554536820064473	0.153330364359138	0.102117673761736	0.0838269416390045
529	0.0900062688836678	0.137557114368888	0.251913478539951	0.194768417454388	0.120553392450366	0.0556207272537723	0.153638590544125	0.102407282543869	0.0840909167856483
530	0.0903078141761062	0.138007235508179	0.252174533688812	0.195355945985913	0.120871679035239	0.0557877750690983	0.153947384869111	0.102685299621573	0.0843550884124664
531	0.0906116339855297	0.138454803669999	0.25243050939469	0.195936508888695	0.121191569662466	0.0559548261527891	0.154256902281369	0.102948563620914	0.084619510104961
532	0.0909154585919548	0.138900067248748	0.252681015683	0.196507111329762	0.121507361548925	0.0561200961241142	0.154563019610684	0.103196831478367	0.0848808370626187
533	0.0912192862653154	0.139343857405534	0.252928025130572	0.197071345606782	0.121820532928991	0.0562842273514679	0.154866963116478	0.103435511638548	0.0851401854193152
534	0.0915252327446918	0.139792688415044	0.253174385073174	0.197639143434491	0.122127226018616	0.0564478471682374	0.155166964297857	0.103658373131725	0.0853961694618143
535	0.0918318121141767	0.140243025133809	0.253420551007799	0.198208005699419	0.122431984034473	0.0566113142260014	0.155465787901814	0.103876509568524	0.0856511485792935
536	0.0921410191046384	0.140698542701859	0.253670604796549	0.198787865817302	0.122727731316709	0.0567758026807397	0.155763120259087	0.104076774644655	0.0859016494310312
537	0.0924505144822838	0.141154315734567	0.253920814118792	0.199368434277683	0.123021712275161	0.0569403684057899	0.156060277995639	0.104273714474401	0.0861511936335114
538	0.0927609861631955	0.141609480105589	0.254170274001101	0.199949054130585	0.123306055580781	0.0571050318266278	0.156356793032741	0.104452979541423	0.0863953104338806
539	0.0930716641207412	0.14206453755581	0.254418074299256	0.200526937907257	0.123587266771048	0.0572688673436809	0.15665245299084	0.104625510544993	0.0866373219735797
540	0.0933828997891863	0.142519305923867	0.254661387573591	0.201097424144491	0.123860009649439	0.0574304644542048	0.156945801068673	0.104779834636267	0.0868736415122078
541	0.0936930209150067	0.142971952050553	0.254904958855975	0.201659485125605	0.124127502830157	0.0575890327874653	0.157237036036206	0.104919971343126	0.087105266200104
542	0.094001723532032	0.143421897142765	0.25514885851224	0.202210823053476	0.124388314577474	0.0577437463132998	0.157525581590632	0.10504205137891	0.0873309156234322
543	0.0943107033394639	0.143868837200034	0.255405396465609	0.202753962786688	0.124646972128349	0.0578958493461848	0.157817628922746	0.105145899096745	0.0875527214968994
544	0.0946198603669917	0.144313856005453	0.255670014641716	0.203291861051186	0.124904252406088	0.0580462833753806	0.158111915096332	0.105238090086711	0.087772070018816
545	0.0949297509299674	0.144751763916886	0.255957507238386	0.203822168333055	0.12516082292623	0.0581941010406207	0.158413892106926	0.105310563067322	0.0879875573551243
546	0.0952398483875567	0.145187666191553	0.256251451594702	0.204350334568543	0.125417193258332	0.0583411807570527	0.158718038327959	0.105377474558115	0.0882019556390815
547	0.095555811471888	0.145620995198976	0.256572495081409	0.204876672224729	0.125673765869186	0.058487497075091	0.159033022361008	0.105427099229845	0.0884144298212622
548	0.0958727338452834	0.146054055364166	0.256897599550859	0.205402168778675	0.125929866646898	0.0586335581164587	0.159349523173482	0.105473902621813	0.0886263628422258
549	0.0961943884891138	0.14648626929201	0.257241565960347	0.205921804404195	0.126182045400515	0.0587779479877261	0.159672699019865	0.105506806917943	0.0888349110620347
550	0.0965176877461637	0.146919858910951	0.257590787713487	0.206440552004378	0.126432521843833	0.0589218320491393	0.159997543236953	0.105535635780972	0.0890423815552164
551	0.0968452160086353	0.147356986021285	0.257953523207447	0.206957016110834	0.126678620917812	0.0590644154566416	0.160326677550144	0.105553984958884	0.0892470807513567
552	0.0971761844439165	0.147799502438186	0.258322817229703	0.207478044147441	0.126922775622425	0.0592068017738833	0.160657724716734	0.105566034958689	0.0894506520367713
553	0.0975113575348537	0.148248605785336	0.258700127230988	0.208004650320897	0.127164553875592	0.0593489472030286	0.160991109815255	0.105570385963029	0.0896528447646321
554	0.0978532971197545	0.148708520178179	0.259085418488694	0.208546898575626	0.127406503398436	0.0594925210940832	0.161329322148629	0.105567674753495	0.0898554128548846
555	0.098199383910633	0.149175060695802	0.259475601484207	0.209098733912424	0.127648557893017	0.0596369704940499	0.161670493109816	0.105560635090296	0.0900582110059579
556	0.0985576811902891	0.149658434772083	0.25988244793152	0.209673644845343	0.127896296552497	0.0597863091148931	0.162025552693783	0.10554770495238	0.0902655828637972
557	0.0989192242960758	0.150146283591804	0.260293723903995	0.210254689797482	0.12814554619252	0.0599369474020452	0.162384304190136	0.10553320899207	0.0904741705171059
558	0.0992982643445079	0.150656105226798	0.260736637589354	0.210863329138677	0.128405649345209	0.0600951497914031	0.162767845804408	0.105512183543742	0.0906908116003915
559	0.0996805257711807	0.151169680334054	0.261185884070729	0.211477866680406	0.128667808469004	0.0602546811329904	0.16315610267846	0.105489747679899	0.0909088803839888
560	0.100079466697073	0.151702247797569	0.261668689517047	0.212124182205688	0.128940700323779	0.0604209970109974	0.163569002892763	0.105459693604081	0.0911342581093903
561	0.100484362778694	0.152240790359764	0.262162135097622	0.212782830508129	0.129217715849281	0.0605897455546001	0.163990706829505	0.105426962227261	0.0913622126607707
562	0.100903154223684	0.152793274818878	0.262680407658128	0.213470255290611	0.12950435327315	0.0607641703179261	0.164432952785268	0.10538798381477	0.0915961798061022
563	0.101331169573215	0.153354682737143	0.263216388128442	0.214174166912185	0.129798207367324	0.0609419564261041	0.164890269094135	0.105344488304933	0.0918338051975965
564	0.101769586347015	0.153926153279557	0.263772337092795	0.214896670075715	0.130100199408865	0.0611235329869875	0.165364579630971	0.105295899047026	0.0920755558454021
565	0.102212617095294	0.154500829181242	0.264346480887792	0.215625912132044	0.130405356690117	0.0613042949935212	0.1658515621907	0.105239749060568	0.0923163347864764
566	0.102658132291369	0.155077231045612	0.26493042189929	0.216358782822956	0.130712218331215	0.0614846183938666	0.166345368147371	0.105179527912583	0.0925565905008491
567	0.103104156602928	0.155652800064873	0.265530932514018	0.21709425203979	0.131015182496397	0.061658971746923	0.166847393390647	0.10510575059511	0.0927906320545654
568	0.103550292671544	0.156228186264477	0.266135080358722	0.217830291664753	0.131317291118085	0.0618320146017939	0.167351222867568	0.105028997533114	0.0930233095242351
569	0.103993264950348	0.156800520364656	0.266744539389163	0.218568860043183	0.13160753405435	0.0619964768889032	0.167855982630883	0.104933419435618	0.0932460587708093
570	0.104435865669994	0.157373135244708	0.267354261027409	0.219308593698871	0.131895580283828	0.0621597091823123	0.168360531387068	0.104834425179852	0.0934671978869122
571	0.104876683480791	0.157947386072853	0.267965079702843	0.220054310959604	0.132172723043568	0.0623169390389045	0.168863923022451	0.10471849439051	0.0936804103147205
572	0.105314272509996	0.158519669948042	0.268573552185425	0.220798175723473	0.132443050317339	0.0624705460956083	0.169362934057804	0.104595563513413	0.0938885977941456
573	0.105745593904345	0.159088135620433	0.269177470293648	0.221538444464015	0.132700147530111	0.0626171206584108	0.16985344157545	0.104459044230676	0.0940870309620035
574	0.106171797396379	0.159652572574733	0.269774118374177	0.22227016134142	0.132944494979452	0.0627585771061644	0.170332493117863	0.104311271364309	0.0942772078236078
575	0.106593083688149	0.160213138799887	0.270363781526134	0.222993661722868	0.133176592656085	0.0628951161492632	0.170800537938973	0.104152686231318	0.0944594521556744
576	0.107008929415777	0.160768052292061	0.270931254763188	0.223697312507584	0.133388048318242	0.0630283542404843	0.171244503811832	0.103980520864814	0.0946318637184587
577	0.107422214877927	0.161320305674596	0.271488285687346	0.224391622305602	0.133589790091236	0.0631600389425866	0.171677138414924	0.103801964800187	0.0947996480956984
578	0.107827544838054	0.161862085597866	0.272001079691136	0.225050258070373	0.133760849914791	0.0632921428966605	0.172067552455973	0.103614403259164	0.0949565839223934
579	0.10823149878793	0.162402108430747	0.272505378188117	0.225702273547994	0.133925946673921	0.063424448050326	0.172449832742069	0.103425200459024	0.0951115076454912
580	0.108632836048811	0.162940446417315	0.272967832576793	0.226328005699039	0.13405973414582	0.063561051897077	0.172791352328348	0.103230331199131	0.0952584754128998
581	0.109034398625085	0.1634806763698	0.273425049655415	0.226952850866962	0.134188091616492	0.0636982247036394	0.173127481014651	0.103034266526863	0.0954040815064457
582	0.109436862462938	0.164028474185954	0.273861317493817	0.227574148102399	0.134294729082251	0.0638376733494482	0.173442046101049	0.102833420205093	0.0955442409045401
583	0.109837952263509	0.16458048040148	0.274287761155181	0.228198718864081	0.134391250153397	0.0639757201239681	0.173748111525699	0.102630273703858	0.095680461622958
584	0.110236800213781	0.165139352952825	0.274698175896114	0.228828630642268	0.13447126552807	0.0641114796348061	0.174040309081179	0.102423374278232	0.0958102560745354
585	0.110629566852175	0.165702573265343	0.275088569681875	0.229463085929069	0.134534247890824	0.0642417600103467	0.174316026081402	0.10221296174746	0.0959312383432478
586	0.111017555316952	0.166269209675926	0.275463232717142	0.230101111115497	0.134583847172785	0.0643677353510107	0.174578794073921	0.101999788919788	0.0960452967539949
587	0.111397731188244	0.166843016308717	0.275811416462574	0.230747580124663	0.134609941106164	0.064485686652252	0.174816664363676	0.101779665477863	0.0961467985214015
588	0.111775017470165	0.167419474941503	0.276149806498067	0.231397172191555	0.134627341280479	0.0646006701580902	0.175045325914052	0.101556971260805	0.0962436560508603
589	0.112136673111379	0.167989746802531	0.276454667740006	0.232043596944101	0.134617284944987	0.0647040855678842	0.175240594668115	0.101325745951002	0.09632418888944
590	0.112495683655846	0.168558596941011	0.276753406747435	0.232688973521346	0.134602356010317	0.064805485897547	0.175429965290881	0.101092516210223	0.0964018804377117
591	0.112842053294469	0.169118133873219	0.277019874455044	0.233325898467636	0.13456262019351	0.0648968699259274	0.175589487122624	0.100845938459357	0.0964654642409143
592	0.113184931244863	0.169674430037511	0.277275804825171	0.233957277757801	0.134517137607387	0.0649861694999313	0.175741020338002	0.100596585808334	0.096525914657544
593	0.113517871313372	0.170221502477732	0.277501744311697	0.234572873257459	0.134455298831675	0.0650695363960946	0.175869816722191	0.100339335364557	0.0965774469739278
594	0.11384586525742	0.170766056385946	0.277710141121853	0.235179701200984	0.134386940188974	0.065151310829761	0.175986452576252	0.100080585470562	0.0966260660133519
595	0.114167564133969	0.171307404889785	0.277896210889357	0.235775370436706	0.134310283533742	0.0652310584929768	0.176087611391969	0.0998199271853815	0.0966709772457364
596	0.114485126806015	0.171852440385668	0.278065925551427	0.236369648500696	0.134227088493129	0.0653095400627222	0.176175020049465	0.099556472298753	0.0967135713159797
597	0.114800045019445	0.172399833138758	0.278225183670678	0.236963037127022	0.13413971317334	0.0653872121628718	0.176253637622197	0.0992912294210352	0.0967546839219033
598	0.115107619396446	0.172949238535614	0.278370664164679	0.237561008503127	0.134046005414651	0.0654611091302436	0.176316303907635	0.0990228640399048	0.0967920410898979
599	0.115413241614397	0.173499178939041	0.278512482251968	0.238160198078541	0.133950614349419	0.0655340025813073	0.176374729977462	0.0987536686262216	0.0968283999769239
600	0.115710044801474	0.174047351047911	0.278645057042718	0.23876833020558	0.133851331572182	0.0656005854693391	0.176417687272315	0.0984802997139888	0.0968608394307996
601	0.116005632940968	0.174594627754617	0.278776716737817	0.239377242996123	0.133752448603759	0.0656663543683052	0.176458934137018	0.0982066092772418	0.0968932376040755
602	0.116295881414172	0.175137140423027	0.278904810850081	0.239989012295207	0.133656513271233	0.0657286166375299	0.176493199586622	0.0979318283061378	0.0969260887649175
603	0.116585251603616	0.175677902081528	0.279032440596069	0.240599377791308	0.133563372592158	0.0657912477775072	0.176527004454935	0.0976582808378824	0.096960536202652
604	0.116872838610878	0.176215108659307	0.2791591275378	0.241206893141958	0.133475905906455	0.065854627836891	0.176559874203658	0.0973872377541985	0.0969982245661988
605	0.117160427823557	0.176751186162457	0.279285162360587	0.241811767168004	0.133393673898972	0.0659214601601811	0.176593188396343	0.0971217900639533	0.0970398484858556
606	0.117448019155165	0.177286178868414	0.279410570637723	0.242414103450805	0.133316471288211	0.0659916093644791	0.176626929603817	0.096861718339953	0.0970852536260887
607	0.117739652238447	0.177827282240345	0.279533158627478	0.243021163237176	0.13324639158152	0.0660690191726897	0.176661220674933	0.0966081504713544	0.0971379116355611
608	0.118033187322515	0.178371261219793	0.27965441942317	0.243630445848757	0.133179663829685	0.0661498457356827	0.17669577050541	0.096357643240592	0.0971939827599696
609	0.11833019402733	0.178919053786171	0.279763522518994	0.244238944564356	0.133123927457298	0.0662378522710973	0.176730262188559	0.096113583987084	0.0972595538485768
610	0.118627820090185	0.179467366742673	0.279870024016784	0.244846970874936	0.133070540551939	0.0663271917603225	0.176764804104308	0.0958706978217716	0.0973270287684167
611	0.11892674720448	0.180013269466687	0.279961587012429	0.245446722128442	0.133030597791363	0.066420470155725	0.176800778782699	0.0956307736759723	0.09740307949865
612	0.119225961295418	0.180558473398524	0.280052200930548	0.24604507752464	0.132993515682947	0.0665143456621963	0.176837262082902	0.0953908428785068	0.0974807236201168
613	0.119526192848999	0.181101199794458	0.280139449937437	0.246638483972201	0.132966575886736	0.0666103381988207	0.176875548678618	0.0951508884978612	0.0975640170377748
614	0.119825788578882	0.18164067659955	0.28022803332562	0.24722853961913	0.132943902398751	0.0667074641403427	0.176913924468955	0.094912774407108	0.0976497626676282
615	0.120124469342954	0.182175477164158	0.28031853692103	0.247813773382221	0.132927368232359	0.0668062210791568	0.176952428612527	0.0946773085383951	0.0977390370906408
616	0.120424188852924	0.182709465507837	0.280409379156633	0.248398939962256	0.13291481762226	0.066907962587038	0.176990313660382	0.0944442111187222	0.0978321934837593
617	0.120724630203263	0.183242889426802	0.280500456718473	0.248984059855762	0.132905035246193	0.0670117781174912	0.17702776848918	0.094212759570416	0.0979280475171209
618	0.121026427793148	0.183774551213342	0.280583400450489	0.249567777171279	0.132898282973559	0.0671188574644962	0.177063125688546	0.0939825195462086	0.0980277772188235
619	0.121328630493547	0.184305686648637	0.280663914596973	0.250151075534928	0.132892435796756	0.0672269117177439	0.177097856323277	0.0937526414058228	0.0981286645876927
620	0.121629913179909	0.184830639778939	0.280727565905624	0.250724855218508	0.132889051959341	0.0673360594634462	0.177128900418463	0.0935227455642188	0.0982312679584971
621	0.121930541784751	0.185353751484621	0.280788755194375	0.251295227484977	0.132886248994751	0.0674450206679816	0.177159437528093	0.0932928180019119	0.0983338489146054
622	0.122227117128334	0.185866717383164	0.280839407430478	0.251846149001179	0.132886465755884	0.0675523483243695	0.177187880232123	0.0930626843897436	0.0984356754429369
623	0.122522472492413	0.186376616305683	0.280891358844784	0.252389969383959	0.13288844432813	0.0676591309551271	0.177217209405629	0.0928320627181154	0.098537382214904
624	0.122815112418243	0.18687968873318	0.280946201978318	0.252917984018154	0.132894344350919	0.0677647004643203	0.177248511688614	0.0926003547205929	0.0986388224323826
625	0.123104877453608	0.18737670193859	0.281007749489404	0.253436110354344	0.132903219395909	0.0678694878419428	0.17728206312976	0.0923692296359335	0.0987399683700453
626	0.123391767598507	0.187867655921912	0.281076001378042	0.253944348392527	0.1329150694631	0.0679734930879945	0.177317863729065	0.0921386874641374	0.0988408200278921
627	0.12367601113199	0.188353821219499	0.281150535174243	0.254447893239145	0.132929268981691	0.0680770222472767	0.177355090549925	0.0919076548614076	0.0989410980807627
628	0.123959009201276	0.188837733017916	0.281228025162239	0.254949229525027	0.13294457412447	0.0681803273657261	0.177392988533868	0.0916763914676502	0.0990411062018797
629	0.124238800571	0.189316268541813	0.281298225027613	0.255447923176328	0.132958955852603	0.0682824644796453	0.177429526148662	0.0914431718418138	0.0991389884244525
630	0.124517701788199	0.18979330639956	0.281366158251374	0.255945576662809	0.132972941104994	0.06838419222209	0.177465593639711	0.091209662437796	0.0992362764015784
631	0.124789608503735	0.190258517542564	0.281413573803302	0.256431640747919	0.132982249461248	0.0684817545716944	0.17749693643302	0.0909766979196463	0.0993288491688495
632	0.125060846194857	0.19072262863355	0.28145742065301	0.256915201130859	0.132990618181896	0.0685786344704878	0.177526710552896	0.0907443000186497	0.0994208908964594
633	0.125329844108591	0.191183056941693	0.281489320108334	0.257390379554361	0.132995841165955	0.0686732296426534	0.177551233026929	0.0905137990533395	0.0995111547956387
634	0.125600421952474	0.191646120340339	0.281523011287554	0.257864721802583	0.13300143418174	0.0687686069971372	0.177573992590819	0.0902852061750002	0.0996024204672391
635	0.125873273354375	0.192112975698487	0.28155928080116	0.258337860774184	0.133007559682205	0.0688651099310546	0.177594215284014	0.0900593590803507	0.0996951277137869
636	0.126147448677556	0.192581609577372	0.281601956571224	0.258810774847231	0.133015960769436	0.0689633746619066	0.17761483484666	0.0898383800393277	0.0997892528513472
637	0.126422506614922	0.193051429136748	0.281648903178926	0.259283538987909	0.133025878914511	0.0690628139240484	0.177635718988939	0.0896206463673891	0.0998843232495825
638	0.126699532875327	0.193524119927909	0.281700171540595	0.259759400813442	0.133038887886747	0.0691641509913302	0.177660907159512	0.0894060152461203	0.0999804331207367
639	0.126977114303769	0.193997620553676	0.28175265885851	0.26023613634496	0.133052768630747	0.0692660233369848	0.177687309286783	0.0891922592032455	0.10007683617656
640	0.127252732232668	0.194465210157143	0.281805813391749	0.260702058261745	0.133069832335499	0.0693676068238323	0.177719006479336	0.0889813809931729	0.100172192910748
641	0.12752746318474	0.194930125052234	0.281858808324962	0.261163419737076	0.133087234120221	0.069468841667727	0.177750880819004	0.0887709141887387	0.100267090705065
642	0.127797856324115	0.195381957507743	0.281910857021526	0.261602594713657	0.133105894003837	0.0695682930384506	0.17778282541527	0.0885621399869302	0.100359748957491
643	0.128066908401894	0.195827896020058	0.281961609225261	0.262032937556635	0.133123951370787	0.0696669701384011	0.177812790794328	0.0883525292045413	0.100451358455428
644	0.128333357242455	0.196262393348529	0.282009844707623	0.262446135669681	0.133140839146562	0.069764144242145	0.177838914163515	0.0881412944716138	0.100540932135829
645	0.128595901625852	0.196684001229962	0.282058383914018	0.262845725600375	0.133156918016419	0.069859837270924	0.177862640895576	0.0879299584518646	0.100628810625148
646	0.128854983566102	0.197094178847041	0.282107192460595	0.263233247897663	0.133172279554613	0.0699542168936022	0.177884242307923	0.0877185326117264	0.100715185831811
647	0.129111722460867	0.197494849571045	0.282160996657888	0.263611409435559	0.133189719993729	0.0700492525737441	0.177907858027859	0.0875076863676353	0.10080192917271
648	0.129367504337052	0.197891637197878	0.282216841332234	0.263985747564689	0.133208009561391	0.0701445562210191	0.177932296493149	0.0872970768599579	0.100888822878296
649	0.129619874251648	0.198282667306498	0.282279464231037	0.264347316273743	0.13323326709921	0.0702417066558906	0.177964871838962	0.0870906045786736	0.100977337930007
650	0.129871376326981	0.198672490445063	0.282342978092832	0.264705320149722	0.133260252159489	0.0703390968147771	0.177999252107859	0.0868848240533341	0.101066148381695
651	0.130117936774514	0.199056578098213	0.282407885538138	0.265041625494069	0.133296876177912	0.0704368360637491	0.178042740720922	0.0866813899541307	0.101156124143071
652	0.130361502301964	0.199435315390393	0.28247167382259	0.265367929971979	0.133336349229416	0.0705336144782855	0.178087599777333	0.0864783871414417	0.101245792908665
653	0.130597366606347	0.199800294611509	0.282532584264843	0.265668517936195	0.133383148365984	0.0706279221757019	0.178135982830924	0.0862764933512182	0.101334672256535
654	0.130828236088859	0.200153585616159	0.282591185009928	0.265954252287372	0.133433805697931	0.070720354651213	0.178184765057827	0.0860749918414199	0.101422885056206
655	0.131053242084827	0.200493155671045	0.282647074371382	0.266222549788462	0.133488992215758	0.0708105857792702	0.178234015879489	0.0858739508347292	0.101510315386253
656	0.131271016923098	0.200814118524541	0.282698639998424	0.266473922450936	0.133547433477679	0.0708989418305626	0.178283119612088	0.0856756036949073	0.101596861657726
657	0.13148489806107	0.20112506211575	0.282747877460783	0.266716181738772	0.133607627294111	0.0709862882251354	0.178332144142885	0.0854787070987842	0.10168293189766
658	0.131691479865632	0.201413548405725	0.282789400776798	0.266941927799746	0.133670004578611	0.0710734542954155	0.178380962348646	0.0852839207656327	0.101768975535516
659	0.131896371120033	0.20169691890249	0.282829203191599	0.267163933360539	0.133732827149004	0.0711605446188112	0.178429629203879	0.0850894474094591	0.101854956347057
660	0.13209155587737	0.201953187210555	0.282860872479522	0.267366696590441	0.133796599905973	0.0712462963616042	0.178474673092266	0.0848920971020284	0.10193906960938
661	0.132284175144207	0.20220375319302	0.28289208471765	0.267564482246845	0.133860862522266	0.071331268377162	0.178518620020474	0.084693420954799	0.102022217152218
662	0.132467698581091	0.202434101839271	0.282921676506502	0.267744620142661	0.13392686191253	0.0714134759052494	0.178558677726228	0.0844900441028288	0.102101940780512
663	0.132646951615331	0.202655810968465	0.282954354404034	0.267912281805853	0.133995405387939	0.0714946484961472	0.178598769447113	0.0842850283748777	0.102180173220909
664	0.13282005943601	0.202865087621896	0.282991473287227	0.268061989866003	0.134067609863921	0.0715743317871868	0.178638910116602	0.0840776542644176	0.102256259805552
665	0.13298742294842	0.203062604498788	0.283034855503696	0.268188843435853	0.134143072530814	0.0716534699748421	0.178681082894406	0.0838708141839386	0.102330652605409
666	0.133150956921985	0.203252281524654	0.283082413275682	0.268300460678836	0.134220707324981	0.0717322447602412	0.178724610411085	0.083664330123447	0.10240391621541
667	0.133306834297017	0.203424552643492	0.283140406395067	0.268383477604662	0.134300006062929	0.071810249448423	0.17877132834071	0.0834626972044594	0.102475037871931
668	0.133460676373703	0.203592196875651	0.283201173467559	0.268458891914535	0.134379747115048	0.071888049427218	0.178818894354788	0.0832623538294158	0.102545590148412
669	0.133605204514334	0.203738901416921	0.28327518839558	0.268513698095464	0.134459355325603	0.0719624999404233	0.178868479206863	0.0830689282435911	0.102612897732749
670	0.133748087407096	0.203882149791029	0.283352043451756	0.268567002795135	0.134539464829575	0.0720359509067259	0.178918548338596	0.0828762847664755	0.102679695684614
671	0.133883865658334	0.204010610365011	0.283441445001571	0.268615030124371	0.134622035061249	0.0721048554725379	0.178970780737813	0.0826867705325941	0.10274432873154
672	0.134016713297117	0.204132813985955	0.28353602003817	0.268660690057945	0.134707252922473	0.0721717659929462	0.17902480853397	0.0824965832484874	0.102808379141195
673	0.134144350958199	0.204243894134831	0.283639792384609	0.268702141288122	0.134797177680672	0.0722351315437483	0.179082028146909	0.0823051994306468	0.102871393751257
674	0.134265933156131	0.204342057294987	0.283745212066396	0.268731252079352	0.134890668087202	0.0722960133804386	0.179142262356882	0.0821134430596911	0.10293302667061
675	0.134382757490161	0.204430071392577	0.2838519260831	0.268750666811411	0.134986960074562	0.0723549437274697	0.179204865178811	0.0819213939684308	0.102993573975834
676	0.134492391395427	0.204497188096924	0.283947063413144	0.268740507147589	0.135084889976181	0.0724137539742245	0.179269058047726	0.0817302697287148	0.103052492106254
677	0.134599628491105	0.204557339003524	0.284038341847635	0.268720489351806	0.135183365849221	0.0724725241875539	0.179333780932303	0.081539453772847	0.103110867178407
678	0.134698262927665	0.204585886367177	0.284105418982621	0.268654770761157	0.135279380351475	0.0725331530042154	0.179396316695044	0.0813511911530832	0.103166496026519
679	0.134795160287423	0.204607859665629	0.284168462675399	0.268580413668338	0.13537493392291	0.0725940461252457	0.179458410433909	0.081163050554395	0.10322144257941
680	0.134884107380394	0.204599337337412	0.284214851366513	0.268467767004464	0.135468454223729	0.0726559141154976	0.179518480282716	0.0809746358533415	0.103272996103362
681	0.134969834367997	0.204581005840067	0.284260912659447	0.268344807948086	0.135562392874232	0.0727174323638856	0.179579063747204	0.0807864196688734	0.103323163800988
682	0.135049023565913	0.204542758756919	0.284306309234864	0.268200911609958	0.13565718090137	0.0727782405303079	0.179640690007167	0.0805986065332304	0.103370517851223
683	0.13512247783466	0.2044917192147	0.284356407186839	0.268041784396992	0.135751848493995	0.0728371235555124	0.179702335444777	0.0804114459601587	0.103414774265069
684	0.135190638322636	0.204428871248722	0.28441084487102	0.267868597914945	0.135846404916302	0.0728942295272851	0.17976399858483	0.0802248877525373	0.103456171322247
685	0.135249616208902	0.204349278514186	0.284470463467076	0.267667630680229	0.135936303502146	0.0729472484083818	0.179821020756371	0.0800402781072471	0.103491783259928
686	0.135304843455034	0.204262846367141	0.284532198210237	0.267455316377521	0.136024299591407	0.0729985979144135	0.179876147321054	0.0798564643536132	0.103525032261477
687	0.135345973617043	0.204152902432672	0.284588188726251	0.267202065558799	0.136102263517774	0.0730420562443327	0.179919541914517	0.0796750993570576	0.103548960719476
688	0.135384261624571	0.204037539003384	0.28464270404332	0.266940579517351	0.136178721176945	0.0730839629723126	0.179961115134794	0.0794937115850499	0.103571116222619
689	0.135409518195757	0.203894328195253	0.284689055563284	0.266641414469128	0.136250552158766	0.0731189292967432	0.179996738740026	0.0793099391710803	0.10358561144006
690	0.135430248511582	0.203741518119577	0.284734825259959	0.266334802312881	0.136321667153947	0.0731520494129519	0.180032506558271	0.0791253938833174	0.103597705450842
691	0.135440417564897	0.203566309752963	0.284779237368962	0.266010813571245	0.136391111513634	0.0731808617099764	0.180068610873546	0.0789390452233704	0.103604196646087
692	0.135442321285693	0.203373919474478	0.284826872995496	0.265676392729296	0.136458600023673	0.0732071240295568	0.180105266130892	0.0787499277994513	0.103605912005709
693	0.13543562231346	0.203163645981596	0.284877863711708	0.265331113987024	0.136524052853465	0.073230732290981	0.18014249481774	0.0785579286007859	0.10360265659764
694	0.135417151921741	0.202931196216828	0.28493016172444	0.264969475064375	0.136582636929799	0.073249709124043	0.180175185466681	0.0783627121769843	0.10359126113072
695	0.135393392921269	0.202688783199473	0.284983047073292	0.26460048591576	0.136638135044435	0.0732666051704496	0.180205837286997	0.0781660503331939	0.103576208535909
696	0.135357546145696	0.202419167243339	0.285032034231169	0.264199579529343	0.136683575062163	0.0732779046724487	0.180228098791288	0.0779659119793191	0.103551754077342
697	0.135319153546922	0.202143702577079	0.285079625920467	0.263791413546981	0.136726771603262	0.0732879588781119	0.1802486063778	0.0777653032978692	0.103525284316313
698	0.135270439810456	0.201843636898353	0.285117282793299	0.263349814243258	0.136759941087813	0.0732924685750971	0.180262101450884	0.0775647376492103	0.10349038240878
699	0.135217889666561	0.201536168230234	0.285150906137328	0.26289757027362	0.136790087856454	0.0732949872265128	0.180273536045889	0.0773643604183521	0.103452541333762
700	0.135155474474991	0.201209663303679	0.285174157550145	0.262417954305911	0.13681246192704	0.073292386046464	0.180279672268693	0.0771644676904099	0.103407142399497
701	0.135082525616058	0.200865895779722	0.285188684143475	0.261912939335573	0.13682763963083	0.073284512709586	0.180278822067818	0.0769619234347719	0.103353959079261
702	0.13499769836627	0.200502661922527	0.285193372110576	0.261379282936738	0.136834702282701	0.0732706941745817	0.180270093559392	0.0767563891585405	0.103291997621654
703	0.134896196547976	0.200113760860606	0.285188452691493	0.260811341624151	0.136829519401268	0.0732485535485273	0.180247481101641	0.0765480417132478	0.103218003714763
704	0.134786481882508	0.199712217742626	0.28517880127623	0.260226513712253	0.13681830513776	0.0732223139821052	0.180218030280791	0.0763383086772234	0.103138083377627
705	0.134658459057546	0.199280301402672	0.285165997027769	0.259610521494797	0.136793084074358	0.0731860150615744	0.180172871568081	0.0761277693441514	0.103044703518511
706	0.134526646843539	0.198841723251381	0.28515296608695	0.258988025087975	0.136765035257099	0.0731476145834875	0.180124749428614	0.0759168950458398	0.102948493763626
707	0.134378326865726	0.198369880318755	0.285143764402943	0.258336585234304	0.136725474827644	0.0730998386131144	0.180066972384608	0.0757026604970729	0.10283945766441
708	0.134226146526762	0.197890812937019	0.285135006750995	0.257678137204333	0.136683158439154	0.0730501166264461	0.180007991816084	0.0754874527247826	0.102727374064117
709	0.134062979006059	0.19739118366166	0.285127512882599	0.256999742826434	0.13663299816726	0.0729948559780147	0.179945585831622	0.075269475008618	0.102606616806914
710	0.133893202973729	0.196880004899422	0.285119305230421	0.256305661702085	0.136579481413619	0.0729366027991915	0.179882926745882	0.075049777416591	0.102480942348792
711	0.1337156691234	0.196355268043891	0.285110259658152	0.255593165701469	0.136522024442274	0.0728748366499083	0.179819970541253	0.0748280608398559	0.102349495524371
712	0.133530057115868	0.195814726622011	0.285106883206404	0.254856053777442	0.136464288909193	0.0728085889245145	0.179760598833519	0.0746051607148733	0.102212570960703
713	0.133340283633415	0.195266043453831	0.285106427210681	0.254106260923175	0.136406409874611	0.072740032508397	0.179703073684792	0.0743816508832177	0.102072824531362
714	0.133143440993321	0.194699257957854	0.285125280485778	0.253330153253814	0.136353744579786	0.0726677025008813	0.179655092564622	0.0741609156934857	0.10192991702129
715	0.132944975547326	0.194128202807144	0.285148251784976	0.252548314279113	0.136302293770012	0.0725947142336315	0.179609226446801	0.0739410564094336	0.101786470460396
716	0.132739115234173	0.193536424351244	0.285186492670301	0.251743797832094	0.13625657283551	0.0725210373512454	0.179572154393741	0.0737278432353536	0.101642640751029
717	0.132529464691768	0.192936316647225	0.285221648182427	0.250931517868921	0.13621093292597	0.0724471442739082	0.179534781187701	0.0735162394148778	0.101498159558635
718	0.132309026573797	0.192312502621635	0.285248022247755	0.250097141744386	0.136165523625936	0.0723726358724794	0.179496550853945	0.0733092160623523	0.101351824145313
719	0.132078472462558	0.191669704596193	0.28525910225867	0.249244062763151	0.136118201017876	0.072296213909458	0.179453632634387	0.0731027482212956	0.101202255807743
720	0.131836043054873	0.19100462100571	0.285252228379621	0.248369028254485	0.13606863235257	0.0722175455915235	0.179405211244538	0.0728969325023978	0.101048892298226
721	0.131578925936885	0.190313639763279	0.28522947586982	0.247465227593516	0.136017213733447	0.0721350822735688	0.179350809878685	0.0726902302381996	0.100890168781714
722	0.131314242422682	0.189609317306209	0.285198543459328	0.246546608005603	0.135964842107811	0.0720506639556036	0.179293327919131	0.0724830712688467	0.100728684049475
723	0.131035591679019	0.188879363201776	0.285169260670807	0.245595430548313	0.135914746945409	0.071963139159381	0.179234196955356	0.0722761879117113	0.100563647044818
724	0.130753954238256	0.188143607213718	0.285140961312019	0.244637023403324	0.135865474544747	0.0718750408416021	0.179174850943884	0.0720694934793134	0.100398071367016
725	0.130461147058376	0.187382325684401	0.285123861843639	0.243648386337293	0.135823286214435	0.0717858800763935	0.179116341451758	0.0718650559498217	0.100233116148136
726	0.130164999828142	0.186613132122516	0.285106317843134	0.242651876389769	0.135783454652438	0.071696459592407	0.179057236443645	0.071661493291044	0.100068786455492
727	0.129859346300749	0.185821419698704	0.285087508635812	0.241632959010305	0.135750330815648	0.0716062999088221	0.178996436505418	0.0714604206489141	0.0999062371067482
728	0.129546418770862	0.185013831713774	0.285060897859148	0.240596171405707	0.135722649580991	0.0715158273984385	0.17893483976103	0.0712607864955664	0.0997448576452243
729	0.129224952194567	0.184187607200575	0.285025128718473	0.239538405710733	0.13570135748797	0.0714249876565954	0.178872307635495	0.0710628410029629	0.0995848515295669
730	0.128895295954461	0.183345947008212	0.284977483563161	0.238460054361762	0.135690272665881	0.0713351292908835	0.178812978133112	0.0708692357632813	0.0994280882712545
731	0.128561605999344	0.1824966841679	0.284923989027505	0.237371563810075	0.135684215305595	0.0712457542895346	0.178755226042132	0.0706777682601134	0.0992729222411867
732	0.128217419323989	0.181626199875709	0.2848601226421	0.236255272471276	0.135692905996621	0.0711579408945787	0.178706784621972	0.0704929693877614	0.0991217388083278
733	0.127870812828681	0.180750891471215	0.284793850624011	0.235133186972885	0.135704649269888	0.0710702876117599	0.178660258398558	0.0703097145812988	0.09897129022218
734	0.127512895613385	0.179853620575237	0.284716208478357	0.233989312650787	0.135727670127533	0.0709816613981898	0.178620693186388	0.0701337350826445	0.0988226982611794
735	0.127150904768731	0.178948794389485	0.284636041136747	0.232839342194143	0.135752102550342	0.0708920459712302	0.178580833709725	0.0699593397985062	0.0986737092490729
736	0.126777900037292	0.178023540938789	0.284549046413481	0.23167288959595	0.135780351427115	0.0707997560043658	0.178540178629064	0.0697892277610221	0.0985236467284205
737	0.126399673482935	0.177090410988438	0.284462953745435	0.230502436976408	0.135809380066622	0.0707060851764288	0.178497852950332	0.0696214350361116	0.0983733159244242
738	0.12601578995375	0.176148748163462	0.284377838303877	0.229327651000405	0.135839253449093	0.0706109184156631	0.178453717457024	0.0694561548998224	0.0982226944801385
739	0.12562330104344	0.175191277466774	0.284299154204183	0.228139313978363	0.135871920417684	0.0705138978395235	0.178410478896557	0.0692916352066552	0.0980715982317311
740	0.125226762542012	0.174226367771634	0.284223496618307	0.226944599993479	0.135905902015037	0.0704160048796785	0.178367662422135	0.0691274733690747	0.09792027854609
741	0.124826382722961	0.17325551771955	0.284152008615925	0.225750359706327	0.135945723679666	0.0703183355509558	0.178330484409421	0.068965903072212	0.0977717076190582
742	0.124425099206603	0.172282838995368	0.284080963709939	0.224555197854783	0.135987080951171	0.070220968498024	0.178294664404783	0.068805190125324	0.0976238726448878
743	0.124019478754483	0.171299093956559	0.284009188322847	0.223350125988947	0.136036666653082	0.0701263783200949	0.178265529053372	0.068649907322239	0.0974800438815261
744	0.123613882916649	0.170314745721287	0.283937254179699	0.222143061227295	0.136088066190986	0.0700335259059954	0.17823741420709	0.0684974135658101	0.0973378426021948
745	0.123208344512148	0.1693289900276	0.283864949605756	0.220931346375404	0.136143698012873	0.0699447282741649	0.178211680539443	0.0683514275849118	0.0971994387856015
746	0.122801148114741	0.168337014702557	0.283795219492834	0.219708987868807	0.136201430058677	0.0698587928630637	0.178186186642938	0.0682078362166058	0.0970622482116102
747	0.122392293724429	0.167338819746156	0.283728063840933	0.218475985707502	0.136261262328396	0.069775719672692	0.178160932517575	0.0680666394608922	0.0969262708802211
748	0.12198585774134	0.166342684778433	0.28367304389516	0.217250129385118	0.136321711581019	0.0696965701692413	0.178138205961114	0.06792784075289	0.0967920910624799
749	0.121580409558383	0.165347391214536	0.283622980787101	0.216027191785674	0.136382412840744	0.0696190232984766	0.17811651179195	0.0677900215291643	0.0966586454404541
750	0.121175062158022	0.164350348245038	0.283595981176559	0.214817343373278	0.136440531194201	0.0695423467705564	0.178100946291543	0.0676554577684863	0.096525159128181
751	0.120769991721265	0.163354624585235	0.28357326253235	0.213612667566977	0.136497270822243	0.0694651159320731	0.178086481954224	0.0675219824458488	0.0963914388465306
752	0.12036687925587	0.162369844662862	0.283565210269432	0.212436430948837	0.136545773113879	0.0693831889117926	0.178075647844337	0.0673941278971077	0.096256032301056
753	0.119963476505634	0.161387222394924	0.283557876023289	0.211267313428331	0.136591558330339	0.0692986306810697	0.17806543836297	0.0672679512905253	0.0961195371185091
754	0.119559456900109	0.160409185142659	0.283552067562791	0.210113323990298	0.136631569762046	0.0692084811281569	0.178056556217209	0.0671453403110301	0.0959807285821835
755	0.119161334112557	0.159443422118363	0.283548194866605	0.208980550407835	0.136670674024872	0.069119413931831	0.178051175917705	0.0670286873408464	0.0958444902844919
756	0.11876844057868	0.158488543786796	0.283546038791601	0.207866590885974	0.13670897381718	0.0690313065611575	0.178048901029034	0.0669173178883539	0.0957105312550229
757	0.118388172329742	0.157550383393318	0.283549806330765	0.206779996318899	0.136749716659794	0.0689550828721502	0.178051880608031	0.0668203631321461	0.0955862623303095
758	0.11801233999173	0.156618096869981	0.283555655139772	0.205703016465667	0.136791317871434	0.0688830345307552	0.178056706351345	0.0667284729989572	0.0954653980369968
759	0.117642554052612	0.155686525700336	0.283543546245054	0.204632979447244	0.136827639816156	0.0688266976811063	0.178052316855497	0.0666496744520974	0.0953517590396118
760	0.117270672762955	0.154749100171555	0.28352340048863	0.203556882936486	0.136860883816004	0.0687717093743733	0.178043066677012	0.0665712212669107	0.0952373591264188
761	0.11688511450829	0.153778286589897	0.283463068322241	0.202444378632473	0.136878260646439	0.0687196769273283	0.178009021034913	0.066490820623002	0.0951164924441598
762	0.116491777463103	0.152793231641301	0.283383248376296	0.20131563260828	0.136885301879624	0.0686641424678326	0.177960999257102	0.0664054410380583	0.0949892904713116
763	0.116084611456987	0.151782858707039	0.283268783488918	0.200158012414878	0.1368739687177	0.0686023822084248	0.177888131015804	0.0663112100023854	0.0948508257596382
764	0.115669484053012	0.150760747954581	0.283133013542193	0.198987697254999	0.136848286593368	0.0685333745277622	0.177798019702633	0.066208357296316	0.0947031066614631
765	0.115248350682229	0.149729782356818	0.282981171357715	0.197807805190584	0.136811779813184	0.0684588994942233	0.177694900458048	0.0660990005231052	0.094548406183997
766	0.114829440896334	0.148704140760047	0.282817018248406	0.196634225135338	0.136767469977359	0.0683820873608263	0.177583924694247	0.0659849643071225	0.09439082809689
767	0.114411158275407	0.147680000804583	0.282649392826964	0.195462425390371	0.136720959279686	0.0683046160454181	0.177470732989128	0.0658696082483067	0.0942324383762946
768	0.114010139920682	0.146682725910179	0.282482608917432	0.194319120275436	0.136677378584905	0.0682362613835254	0.177362475888259	0.0657609863629644	0.0940831458496239
769	0.113613904782486	0.14569264932255	0.282318823957869	0.19318339093962	0.136635036028539	0.0681707309576583	0.177256569273096	0.0656557153535571	0.0939366705098893
770	0.113236104964297	0.144730280505006	0.282167000797706	0.192076813422095	0.136597527641877	0.0681161291262563	0.177159865222803	0.0655635757600726	0.0938010963545077
771	0.112866586115961	0.143780038037929	0.282022272934333	0.190982780797416	0.136561503548655	0.0680660252837311	0.177068691054016	0.0654781589390741	0.0936700709046247
772	0.112508983785218	0.142847245684938	0.281887755376099	0.189906800579518	0.136527615389893	0.0680223941569066	0.17698547451959	0.0654024163516532	0.0935455911528983
773	0.112162661561085	0.14192961704789	0.281756241083386	0.188846298879498	0.136495847647188	0.0679852446816027	0.176909838876572	0.0653348756221065	0.0934278161381009
774	0.111823252950679	0.141021282301259	0.2816265675018	0.187795284013017	0.136465379514324	0.0679520678314243	0.176838849586351	0.0652723618377087	0.0933141504781955
775	0.111497788932553	0.140132824942142	0.281490458529039	0.186766113582696	0.136439060157548	0.0679286199499491	0.176775037211459	0.065220417317704	0.0932109989187938
776	0.111175778826589	0.139249560368506	0.281353042417645	0.185742628095331	0.136413815241514	0.0679076248199961	0.176712907226642	0.0651711674053688	0.0931105161415691
777	0.110868115701069	0.138393212115021	0.281215889191066	0.184748201359957	0.136393962919639	0.0678976713984904	0.176655875308991	0.0651346331388784	0.0930224003654408
778	0.110564596465705	0.13754502299953	0.281085453391309	0.183762861519807	0.136376685560734	0.0678904659639945	0.176600917160904	0.0651012278442773	0.0929379449890052
779	0.110273508900813	0.13672131129802	0.280975169872018	0.182804782365332	0.136367133090739	0.0678915044905278	0.176552180321513	0.065077209465344	0.0928644708116477
780	0.109989970142494	0.135910720123408	0.280877359180558	0.181861559362608	0.136363891089311	0.0678968023534351	0.176507159845063	0.0650568666534798	0.0927974831938186
781	0.109715293026671	0.135115531306459	0.280794190504376	0.180935776190202	0.136368057029244	0.0679071003068684	0.176466502055542	0.06504083863774	0.0927381102328272
782	0.109449855963198	0.134340670549007	0.280712257315661	0.180037839157616	0.136377554466293	0.0679193681152837	0.176428040151868	0.0650266977582663	0.0926843460856451
783	0.109188767159654	0.1335753759372	0.280630905532812	0.179153006190829	0.136389560843161	0.0679325629142788	0.176390611606238	0.065013444942918	0.0926332213802557
784	0.108935970653617	0.132830611832686	0.280530026453033	0.178299122358083	0.136404765852075	0.0679472817150223	0.176352874401364	0.0650053043413519	0.092587724580841
785	0.10868578673436	0.132091200468235	0.280424054602381	0.177452784093507	0.136421469262607	0.0679630905413438	0.176315496535564	0.0649990554138071	0.0925443716617747
786	0.108449892079795	0.131377126458482	0.280293969189125	0.176639929377621	0.136448100258795	0.0679870143599671	0.176281696061494	0.0650041449326289	0.0925140534108823
787	0.108221069014898	0.130672414303457	0.280158854052485	0.17583781346996	0.136481136614372	0.0680162017162249	0.17625029020368	0.0650134800242196	0.0924906471998872
788	0.108007985939909	0.129988539825084	0.280012543725089	0.175059600070927	0.1365284300602	0.0680571046885077	0.176224214298181	0.0650322649390701	0.0924826258518893
789	0.107806199159396	0.129324181826941	0.279868332890851	0.174302259665827	0.136585003845589	0.0681047090845207	0.176202189569093	0.0650537217333147	0.0924835164691928
790	0.107614429847568	0.128677130896172	0.279725983871299	0.173563429274214	0.13664980736606	0.0681582562525206	0.176183757392669	0.065077547930041	0.0924923101500655
791	0.107426082850694	0.128046948138427	0.279591750644911	0.17284180062159	0.136715067869757	0.0682105876038584	0.176163420285186	0.0650969011727888	0.0925008819597819
792	0.107238938288803	0.127422692036068	0.279460368913417	0.172126215823205	0.136780488935127	0.068262491776369	0.176142413877601	0.0651146828371117	0.0925093758147676
793	0.107049649260564	0.126811932605547	0.279332916272165	0.171424009735159	0.136837255357528	0.0683092083674242	0.176113464055197	0.0651272433752366	0.0925119932730402
794	0.106862741559803	0.126207128297054	0.279205796831657	0.170727631094913	0.136894039878597	0.0683575855117325	0.176084390552342	0.0651415322197121	0.0925160474280155
795	0.106688011395071	0.125627930811092	0.279079294552389	0.170056266238637	0.136953136712254	0.0684154030948675	0.176056754384964	0.0651656009174049	0.0925286260771937
796	0.106527878698885	0.125067282827507	0.278958776495818	0.16940370070559	0.137024046459919	0.0684866795086913	0.176039305166112	0.0652023899867315	0.0925547957417716
797	0.106391562925062	0.124536899821486	0.278848022171014	0.168781807752549	0.137114229909386	0.068579915067323	0.176038476758014	0.0652599333466184	0.0926031402209488
798	0.106291556459797	0.124058817578153	0.278762487575827	0.168212636716024	0.137235265090007	0.0687001483276652	0.17606802444443	0.0653429328126586	0.0926814442809304
799	0.106215756200236	0.123615602509944	0.278693766133716	0.167678613623845	0.137376868091396	0.0688383800558143	0.176117822860524	0.0654429030161345	0.0927797213947817
800	0.106188640332114	0.123261501167229	0.278663938550065	0.167233063535817	0.137551729182085	0.0690003509285526	0.176206928428059	0.0655664914194492	0.0929088099035359

## Sheet: K13
wl	K1	K2	K3	K4	K5	K6	K7	K8	K9	K10	K11	K12	K13
330	0.158532937050272	0.176198356951563	0.140467973670315	0.124724368051594	0.17146220052511	0.129766506040642	0.159928356758994	0.145265460015764	0.136890521150727	0.11654126517039	0.132606620845893	0.127236898979675	0.139847343689307
331	0.154309893887189	0.171939931313672	0.136345166312868	0.119929943640236	0.167731697408128	0.125329193637037	0.156006019701737	0.140615928958074	0.132106414951271	0.112086014485818	0.127943472257939	0.122855874568395	0.135242990418785
332	0.148944812408019	0.166578139174757	0.131095106053374	0.11385733362868	0.162972890756124	0.119677709389055	0.15097586802822	0.134733843626131	0.126084535934471	0.106445374417058	0.122019319586466	0.117302029155724	0.129395629253015
333	0.143017234444805	0.160672897863697	0.125289831677946	0.107155169515534	0.157707606243587	0.113428200202797	0.145400076319827	0.128244679323288	0.119453007619575	0.10022088584564	0.115474075351468	0.111170525637891	0.122936040317944
334	0.136212070324702	0.153948550202462	0.118780435345041	0.0997374228690372	0.151649842288858	0.106445164084639	0.138983391237247	0.120934356114669	0.112075181271564	0.093462661045208	0.108142589517382	0.104418596744474	0.115650619002328
335	0.129187509665377	0.147019425953682	0.112095008522765	0.0921407805892025	0.14539395847358	0.0992787462335061	0.132356482811121	0.113418743179606	0.104510780415273	0.086571002187523	0.100614543283523	0.0975115615071611	0.108158739591577
336	0.121797695281949	0.139807174016886	0.105372992853641	0.084622957922777	0.138816893650349	0.0920966172772451	0.125430579443226	0.105730172820072	0.096920135256612	0.0800121903495002	0.0930152254189319	0.0907519453504603	0.100500684353443
337	0.114403553474737	0.132601257343277	0.0986855432967704	0.0771556936711362	0.132235784942358	0.0849522291493853	0.118508338886089	0.0980619279827572	0.0893682293127825	0.0735320123125543	0.0854482170664424	0.0840481075762123	0.0928634610328093
338	0.107372326742312	0.125828460543308	0.0925827754863971	0.0703875662589658	0.1259700623682	0.078417640715175	0.111996060628847	0.0909160697055751	0.0824541853170143	0.0678912668026285	0.0784714353946247	0.0780442928563704	0.0857485608612955
339	0.100560811261135	0.119279417918439	0.0866974963178535	0.0638573966713827	0.119892567691895	0.0721105663278572	0.105697011809287	0.0840053193708309	0.075781673786196	0.0624793887302821	0.0717291490987188	0.0722615681214586	0.0788670989152615
340	0.094685959535275	0.113684274671626	0.0817394055697417	0.0583416788623039	0.114617518264337	0.0667734202457131	0.100306993750368	0.0780968713170064	0.0701388532901644	0.0580432086813007	0.0659865536159107	0.0674213849012489	0.0729808209831148
341	0.0893014143418912	0.108561879320028	0.0772191510815477	0.0533096827111023	0.109767783246259	0.0619077163430034	0.0953741480271924	0.0726959485272309	0.0649907023827837	0.0540427526956953	0.060739512167611	0.063018656510038	0.0675991320737317
342	0.0849587705300191	0.10444407324576	0.0736292986456787	0.0493055950828899	0.105821841348325	0.0580438270715918	0.0914127935174699	0.0683735169235594	0.0608937243512862	0.050968210344764	0.0565455230426417	0.0595455196304498	0.0632896948377212
343	0.0812333722701094	0.100904502451844	0.0705674537349062	0.0458965563572429	0.10242517074453	0.0547566879875682	0.0880179156923366	0.0646874287186098	0.0574016309630255	0.0484162993474714	0.0529669049921623	0.0566012845555643	0.0596096933377894
344	0.0782623852403762	0.0980716636672486	0.0681509513548069	0.0432147996236202	0.0996998317224625	0.0521744657992409	0.0853153982594793	0.0617790935565426	0.0546488410276097	0.0465031600046262	0.0501404071438373	0.0543034850197602	0.0566990021819538
345	0.0759122674859423	0.0958077064333	0.0662519256695782	0.0411147550618214	0.0975374787572862	0.0501500659981801	0.0831827240518413	0.059501924333865	0.0524906683987343	0.0450703697827588	0.0479183972167605	0.0525124833748985	0.0544070497570276
346	0.0739936012618013	0.09393907366675	0.0647125024333274	0.0394189511617984	0.0957663533909667	0.048513305483186	0.081446042593932	0.0576633619504242	0.0507457044066071	0.0439713814924184	0.0461164551671616	0.051073663315268	0.0525450683145979
347	0.0725578118782497	0.0925252260292849	0.0635710401258191	0.0381671357092715	0.0944354967448356	0.0473023080182689	0.0801494096126933	0.0563047173737621	0.0494592709772332	0.0432140272982	0.0447779156268695	0.0500168173933436	0.0511576759028394
348	0.0713098079327052	0.0912882392753528	0.0625843404017106	0.0370879824307709	0.093275855712111	0.0462568850728261	0.0790239065946044	0.0551327074997362	0.0483511549889299	0.042589530808029	0.0436195881735302	0.049108516969416	0.0499548458918975
349	0.070404544783604	0.0904023469339545	0.0618730888492543	0.0363114474005014	0.0924395850776237	0.0455057627815201	0.0782047320735297	0.0542884548210204	0.0475646139680196	0.0421716925216256	0.0427830797054029	0.048458797102784	0.0490836594196888
350	0.0695597653044633	0.0895784124300622	0.0612104457976778	0.035588315590508	0.0916603798075311	0.0448065758997676	0.0774396155225164	0.0535020416473594	0.0468348214707668	0.0417903233300047	0.0420033628229013	0.0478547090992042	0.0482709982778448
351	0.0689679190218435	0.0890415593075946	0.0607442457196961	0.035079982501605	0.0911270602195574	0.0443205726434438	0.0769002962963699	0.05294554802591	0.0463429557619725	0.0415373426891237	0.04145529732134	0.0474380103122864	0.0476999058237461
352	0.0684055505003398	0.0885360199715743	0.0603011468638233	0.0345959197849686	0.090621370834943	0.0438590305110317	0.0763885053539245	0.0524148881162766	0.0458784679421287	0.0412972991901875	0.0409334864255937	0.0470436137544123	0.0471565180391597
353	0.0680214982792425	0.0882171505090161	0.0599980573413806	0.034257693050913	0.0902815037238981	0.0435449649215949	0.0760447956950351	0.0520392656977251	0.0455791432171321	0.0411329134524772	0.0405695403916703	0.0467847222315207	0.0467801446940554
354	0.067681989652807	0.0879390106435321	0.0597313754204862	0.0339533856876429	0.0899808790906468	0.0432660878701621	0.0757454638391547	0.0517018499256061	0.0453190869048213	0.0409842837416443	0.0402430418989196	0.0465592067075093	0.046444024593743
355	0.0674761118103568	0.0877830595692709	0.0595739163042366	0.0337508364367291	0.0897979818907762	0.0430927764327415	0.0755792653923013	0.0514790540927848	0.045176835830568	0.0408829221114433	0.040028886029687	0.0464338191801387	0.0462286642278061
356	0.067335575970555	0.0876901703746971	0.0594684187384764	0.0335924923467307	0.089678117623599	0.0429655109498148	0.0754785273393111	0.0513128262011191	0.0450878333171001	0.0407987139573054	0.0398656094636248	0.0463512867180202	0.0460684116192857
357	0.067301650766653	0.0877001716154028	0.0594477005445674	0.0335062724666468	0.089661096562395	0.0429133730768517	0.0754845930868349	0.0512388933713387	0.0450857100343875	0.0407424930535861	0.0397853464974722	0.0463386756781551	0.0459980716676024
358	0.0673482017136574	0.0878192001009879	0.0594863498566301	0.0334690040101738	0.0897377380447012	0.042911482290823	0.0755692334967508	0.0512336619533226	0.0451457219449527	0.0407019495406994	0.0397627530321367	0.0463693493846126	0.0459909975832414
359	0.0674690383384215	0.0880388691203078	0.0595797999434359	0.0334769214831877	0.0899008372594784	0.0429559734311951	0.0757264043642594	0.0512918472230891	0.0452630894185437	0.0406758774655041	0.039793392952171	0.0464399782415217	0.0460423227610241
360	0.0676531432401074	0.0883975895783345	0.0597197569220675	0.0335228493202364	0.0901608502263171	0.0430396524478532	0.0759439470173368	0.05140274714537	0.0454289805695833	0.0406652926023753	0.0398677676891088	0.0465444403341666	0.0461419796118361
361	0.0678713156755206	0.0888311838879725	0.0598847560732207	0.0335892442763808	0.090473047521189	0.0431444326286654	0.0761939975549514	0.0515420318805434	0.0456209998546336	0.0406630470072823	0.0399656919428409	0.0466671203229769	0.046267661209664
362	0.0681268564523525	0.0894300660034723	0.0600794319110184	0.0336740658109723	0.0908804582060446	0.0432681231492992	0.0764810210987404	0.0517079402418938	0.0458393266329333	0.0406726252960522	0.0400837956165024	0.0468096281678295	0.0464153531496324
363	0.0683923305857641	0.0900728853838213	0.0602819964883038	0.0337637855499611	0.0913131787793769	0.043396840469126	0.0767778729099935	0.0518809257696964	0.0460646465423498	0.0406853466425577	0.0402072634397654	0.046957406708592	0.0465688959400433
364	0.0687779921580756	0.0910702460841548	0.0605838600863008	0.0339235605979698	0.0919798169617728	0.0436012888001092	0.0772013436482561	0.0521508397031549	0.0463817314547057	0.0407511241190895	0.0404109491894015	0.0471806960425813	0.0468098106623931
365	0.0691906751220912	0.0921396155166842	0.0609086822730749	0.0341009958526884	0.0926953482535347	0.0438248753526154	0.0776529795146284	0.0524435956387573	0.0467197380099584	0.0408305117211314	0.0406346298950613	0.0474224015595578	0.0470724135336945
366	0.0698629596103871	0.0938541234336359	0.0614579120905923	0.0344596700118333	0.0938582012260622	0.0442451242590011	0.0783733737048802	0.0529621622147343	0.0472605037781843	0.041050845257286	0.041062282519309	0.0478497575003855	0.0475557689762187
367	0.070590005168911	0.0957421186898403	0.0620593003595856	0.0348625147089811	0.0951344869074515	0.0447128146741024	0.0791521404271372	0.0535298536179302	0.0478439118561069	0.0413074907783462	0.0415378185668165	0.0483224761526007	0.0480897748618934
368	0.0715505058163009	0.0983697178660174	0.062883048342766	0.0354536653839313	0.0968943541371461	0.0453827557316224	0.0801797584700479	0.0543069719161117	0.0486091108332633	0.0417189400245302	0.0422174892082212	0.0489885832059942	0.0488397115841574
369	0.0725455060484589	0.101288644408115	0.0637521810547431	0.0360796401220273	0.0988245812693125	0.0460895557358995	0.0812537777785231	0.0551138550081818	0.0493943102384697	0.0421633058170577	0.0429315957356404	0.0496923249407087	0.0496237682468609
370	0.0736105508921159	0.10479905378405	0.0647134585191255	0.0367763182610557	0.10110069062771	0.0468711905714712	0.082422005717084	0.0559811696514803	0.0502201165733532	0.0426745021733739	0.043715617546786	0.050472476482954	0.0504770987280326
371	0.0746582972872212	0.108710039501286	0.065684369066127	0.0374620848473243	0.103597911121242	0.0476426891970834	0.0835989665845585	0.05682506281291	0.0510120619533017	0.0431880045160347	0.044483114625135	0.0512480435353556	0.05131014832402
372	0.0756857368079398	0.113091267010483	0.0666665880144639	0.0381350422194836	0.106354696860368	0.0484022887936124	0.0847861791511924	0.0576414611912764	0.0517642575165874	0.0437042138861437	0.0452312131041138	0.0520182287953323	0.0521193899243562
373	0.0766813120450509	0.117986274403676	0.0676525746642198	0.0387757899279763	0.109404589792845	0.049132378152239	0.0859799568080657	0.0584146046366088	0.0524596945011565	0.0442148842330169	0.045939441222371	0.0527660512508387	0.0528852343798534
374	0.0776556444264238	0.123223801719532	0.0686410731149215	0.039395064527358	0.112649887520891	0.0498427940189305	0.0871781111917654	0.0591589114599185	0.0531172924332479	0.0447218618977329	0.046621089100147	0.0534989651700317	0.0536221474054581
375	0.0786172119348941	0.129046402551014	0.069662669109184	0.0399993247115954	0.116236095070486	0.0505440242107769	0.0884123138151924	0.0598747721228361	0.0537286659305594	0.0452556866842843	0.0472782060013631	0.0542348818931619	0.054332063704212
376	0.0795742944880202	0.135074569752849	0.0706958939701029	0.0405983095607822	0.119942081746571	0.0512420270033535	0.0896591820363614	0.0605806381888593	0.0543237984102456	0.0457989442433725	0.0479267039108148	0.0549718536555132	0.0550324946665048
377	0.0805381349714767	0.141766454838943	0.0717977673251139	0.0411998645973348	0.124014117809657	0.051951610404531	0.0909702205225003	0.0612708299094947	0.0548815021827994	0.0464025705379395	0.0485657598924262	0.0557427754462311	0.0557219693416157
378	0.0815030254048709	0.148563637157675	0.0729107834727039	0.0418019422776209	0.128143994034719	0.052663174880519	0.0922914401876373	0.0619585512933206	0.0554332381445154	0.0470160334808486	0.0492033987578388	0.056519353597947	0.056409767092472
379	0.0824718901196289	0.155966798185243	0.0741114118109579	0.0424177406399553	0.132585039846467	0.0533995526217164	0.0936713192055796	0.0626335815458137	0.0559478475698253	0.0477102836606564	0.0498404185348573	0.0573536852067631	0.0570936268318112
380	0.0834421415409365	0.163437860456206	0.0753265148620353	0.0430384624688341	0.137062976817486	0.0541427967458848	0.0950587523992904	0.0633088101784682	0.0564590295577983	0.0484178235972372	0.050480208185911	0.0581992052035635	0.0577795817361724
381	0.0844202509660256	0.171293696439737	0.0766236412857786	0.043687083941464	0.141749963691038	0.0549249503735549	0.0964889925890236	0.0639851629653713	0.0569507894008616	0.049200672155531	0.0511356937898315	0.0591081260656073	0.0584774092423242
382	0.0854015634395999	0.179221301013349	0.077946136081466	0.044347382805803	0.146482280515471	0.0557225050409702	0.0979306827567703	0.064664696168931	0.0574380606678195	0.0500075536815939	0.05179916300272	0.0600382059528782	0.0591817248392259
383	0.0863907178594656	0.187324614893708	0.0793307396498438	0.0450362711463953	0.151325577564474	0.0565577657022443	0.099400405629309	0.0653520159098226	0.0579143426622433	0.0508732745425397	0.0524821782927371	0.0610200889708772	0.0599019250721012
384	0.0873750319667414	0.195438498832026	0.0807365650832393	0.0457258890183513	0.156172131689852	0.0573982679883502	0.100870684649072	0.0660331091571661	0.0583725099503014	0.0517561830098816	0.0531622419519456	0.0620152850258294	0.0606170563517071
385	0.0883529298457002	0.203566394242524	0.0821705218260769	0.0464164739435104	0.161023003335079	0.0582457184748143	0.102341700887248	0.0667059486805042	0.0588066647206189	0.0526618750484928	0.0538383929842682	0.0630281285948822	0.0613254683211649
386	0.0893079669733676	0.21162292466604	0.0836078736285787	0.0470755168835579	0.165802071288597	0.0590662719514416	0.103785718355627	0.0673469706695879	0.0591947637623215	0.0535608296482907	0.0544818801678081	0.0640278645735156	0.0619987471806116
387	0.0902457582711133	0.219625618344991	0.0850477866164411	0.0477107649927318	0.170526971544863	0.05986653470135	0.105209368331001	0.0679639899573919	0.059548119008753	0.0544547016188084	0.0551007262022665	0.0650177123699029	0.062645522114962
388	0.0911411450476079	0.227427285282195	0.0864677978119839	0.0482803117284425	0.175087204619062	0.0606098688425871	0.106570403108314	0.0685211842290143	0.0598265600071999	0.0553079687691194	0.0556565437351634	0.0659649243936028	0.0632295759887303
389	0.092019211667535	0.235146842705165	0.0878796801064384	0.0488230226918936	0.179580179266783	0.0613299504535219	0.107905862663884	0.0690539429306469	0.060074402228301	0.056144650852022	0.0561866172322113	0.0668947218059235	0.0637880114011341
390	0.0928325702170558	0.24256278438609	0.0892497088822371	0.0492799805161638	0.183854275627615	0.0619785975953926	0.109151062414582	0.0695057421238963	0.0602244127948297	0.0569039203819597	0.0566340140420876	0.0677592771699392	0.0642674325703843
391	0.0936336034198326	0.249920894497103	0.0906117655592441	0.0497206044091614	0.188086680886182	0.0626136381717272	0.110379069821495	0.0699421204584061	0.0603557887604874	0.0576484446637135	0.0570656629115503	0.0686114054771349	0.0647318034076053
392	0.0943270572281655	0.256771428997553	0.0918757656576391	0.0500406154380299	0.191997513559563	0.0631427354955503	0.111478533484025	0.0702685784668824	0.0603608128345704	0.0582454871869858	0.0573840602518101	0.0693503449993372	0.0650882824802567
393	0.0949980660051252	0.26348627191327	0.0931177229693658	0.050341239813026	0.195828601686015	0.0636537089971414	0.112552141824949	0.0705764905687645	0.0603474900392081	0.0588183564256892	0.0576845431138295	0.0700709110465451	0.0654269913150222
394	0.0955335586730926	0.269362348506224	0.0942255555130735	0.0505285957637232	0.199169934414265	0.064057861790402	0.113470274608189	0.0707753004234789	0.0602286412000805	0.0592495933266696	0.0578806044096036	0.0706839752105405	0.0656615118600071
395	0.0960078704897065	0.274735782730738	0.0952718238403193	0.0506720702341756	0.202219846717709	0.0644207213936096	0.11431158504042	0.0709303159104005	0.0600867000666524	0.0596367567102518	0.0580356387059985	0.0712673090954677	0.0658539422096459
396	0.09631676741192	0.278750220922064	0.096151640767501	0.0506969021839663	0.20448184453927	0.0646719364459331	0.114945190597702	0.0709669244029192	0.0598823242115972	0.0599047583616088	0.0580797481522201	0.0717702611147661	0.0659325731422376
397	0.0964897655796432	0.281511760331283	0.0968818282032592	0.050620199911482	0.206001325818683	0.0648294516989565	0.115391019540197	0.0709063249131252	0.059653818266246	0.0600848518366415	0.0580265381522488	0.072217561965492	0.0659134576207158
398	0.0964672021250509	0.282470347834541	0.0973966951513593	0.0503973874166994	0.206452307683786	0.0648521306554261	0.115566633354093	0.0707058407658568	0.0593905885324199	0.0601384433018419	0.0578332830955609	0.0725847794272967	0.0657536825676647
399	0.0962188988356955	0.281378925800831	0.0976226976259637	0.0499578131526835	0.205673419651462	0.0646795123913977	0.115425252557906	0.0703258849254488	0.0591067116394598	0.0599904793961013	0.0574369587848056	0.0728234327632445	0.0654007705703993
400	0.0957858993178975	0.278610223236874	0.0976123564404354	0.049340888350204	0.203888274430332	0.0643471054924166	0.115024512535287	0.0697990886088358	0.0588059416162993	0.0596776065505	0.0568744869025408	0.0729568972689458	0.0648898374369586
401	0.0952179843958366	0.275033810188212	0.0973655208087293	0.0485010539256751	0.201598031993963	0.0638210862198447	0.114460816581281	0.0691288636107483	0.0584918466878067	0.0591283546166183	0.0561148592241264	0.0729410338353336	0.0642094266172282
402	0.0945894553066431	0.271094512718886	0.0970124340490304	0.0475610716999356	0.199080861823212	0.0632080816779786	0.113823908542159	0.0683941996398245	0.058171765207643	0.0584729033822047	0.0552666543039636	0.0728580810376821	0.063452873648585
403	0.0941998816371685	0.270405507865493	0.0969045331114212	0.0467242994305984	0.198456947491039	0.0627048962978422	0.113594618064679	0.0677939008683094	0.0578044421936425	0.0579139394550557	0.0545291582609692	0.0728197605619288	0.0628331313639428
404	0.0938592506440218	0.270382225596085	0.0968468509566496	0.0459086665499219	0.198220808451105	0.062224203999024	0.113448815521511	0.0672211226798057	0.0574274432028319	0.0573747379884306	0.053814337530166	0.0727905816460823	0.0622414105446984
405	0.0940545716920985	0.276540403265618	0.0975789107671489	0.0456380158704822	0.201606843688293	0.0622558793688077	0.114143868415311	0.0670667148521704	0.0569069869074936	0.0574719282209798	0.0536015819347638	0.07310293722352	0.0621400680287261
406	0.0943013834927388	0.283278547475441	0.0984087169534439	0.0454438399566189	0.20533189908075	0.0623581785757795	0.114919336029859	0.0669606878909881	0.0563627251948774	0.0576652821090672	0.0534566303275778	0.0734656651350892	0.0621006964780064
407	0.0948042380124508	0.292867799042692	0.099776213161183	0.0456868747797267	0.210721578215657	0.0628621788220354	0.116093802116017	0.0671145658273785	0.055676427130467	0.0584194998761001	0.0536950375242295	0.0741203287321563	0.0624045588511125
408	0.0952748269857039	0.302116412008439	0.101145418091116	0.0459484741708683	0.215907479151288	0.0633817481857796	0.117221917778532	0.0672601553073582	0.0549765281223947	0.0592088657869931	0.0539452079925054	0.0747930655619089	0.0627111454465131
409	0.0956535832498043	0.310395515108368	0.102519486307291	0.0462629111787219	0.220513395981289	0.0639456296531447	0.118218113004527	0.0673821545652464	0.0542379187362075	0.0600982687227187	0.0542288585415582	0.075517241592382	0.063025485597675
410	0.0959236055794777	0.317478274464469	0.10375223152066	0.0464877807210048	0.224412403023936	0.064425016588167	0.11904905113035	0.067426742763685	0.0535260405582949	0.0608831524755224	0.054429890567372	0.0761911060267282	0.063255910251024
411	0.0960305270075104	0.322766518204826	0.10477299222982	0.0465782990649317	0.227251045385553	0.0647776617246753	0.119632103605918	0.0673552143729493	0.0528542591927942	0.0615112574539435	0.0545069948083271	0.0767895030668843	0.0633604616576539
412	0.096032274435404	0.326778311176934	0.10560667252304	0.0465382632610407	0.229346667787688	0.0650078050507019	0.120043620107725	0.0671967162327773	0.0522378110878174	0.0619667897207241	0.0544710325028601	0.0773066399488424	0.063359492834418
413	0.0959479704086384	0.329745735338655	0.1062872870214	0.0463914104271168	0.23083436476843	0.0651377196226979	0.120314788994637	0.0669670610248848	0.0516666356505418	0.062281126132526	0.0543425612048659	0.0777572912468204	0.0632721892776556
414	0.0957951361048337	0.331837124163282	0.106826900869599	0.0461271559096626	0.231820499834437	0.0651616838451016	0.120473300422256	0.0666694687317215	0.0511344540470574	0.062432579591876	0.0541162922764316	0.0781335603181818	0.0630998081039878
415	0.0956115128359824	0.333534931894432	0.107303166599609	0.0458101557083035	0.232581295489477	0.0651380471858044	0.120581197629034	0.0663413539799583	0.0506197914123778	0.0625108537537476	0.0538460852821474	0.0784764112877299	0.0628892036531595
416	0.0954089330467787	0.334872114868606	0.107709705189508	0.0454303310846159	0.233133610800366	0.0650563500577692	0.12064864914882	0.0659858494627017	0.0501273305876624	0.0624813200741535	0.053524773852444	0.0787670602281711	0.062640115122111
417	0.0952027424917935	0.33614060741288	0.108102962419384	0.0450385399042943	0.233646215569513	0.0649635937928316	0.120708396728228	0.0656251278472559	0.0496390986791307	0.0624312515676136	0.0531937282445656	0.079047765924973	0.0623836962900682
418	0.0949984326960969	0.337243136891306	0.108479150819814	0.0446284436445407	0.23405325200743	0.0648528897244306	0.120759387469657	0.0652618832279346	0.04916538829664	0.0623499488177733	0.0528467147529364	0.0793074540563063	0.0621196724721141
419	0.094797470283781	0.338335117993045	0.108856672566174	0.0442217700791788	0.234454858710164	0.0647446796601585	0.120812917895982	0.0649027509455001	0.0486967957296987	0.062274294463196	0.0525026554178385	0.0795684391566477	0.0618589726226017
420	0.0946186527212202	0.339379172967488	0.109245448695365	0.0438405023036172	0.234834546235085	0.0646556115087641	0.120884640663925	0.0645714842729328	0.0482604698423834	0.0622407068090481	0.0521805470641839	0.0798409745035775	0.0616215564642054
421	0.0944477934299155	0.340425011320232	0.109643793245493	0.0434713967484532	0.235221384506503	0.0645781661864807	0.120966054328769	0.0642516780668708	0.0478361630111107	0.0622316708510807	0.0518692253359135	0.0801255782683885	0.0613945785980042
422	0.0942984509460809	0.341475671399493	0.110068007970744	0.0431351742336237	0.235627556277709	0.064532145550312	0.121073669307458	0.0639628575665453	0.0474443521461753	0.0622890154050085	0.0515870674466451	0.0804428114593225	0.0611958227810714
423	0.094159589227515	0.342505218579133	0.110510868058152	0.0428202324263159	0.236032863419483	0.0645081282080613	0.121192664731932	0.0636933806734103	0.0470739195430043	0.0623913265513931	0.0513243901533446	0.0807862482894901	0.0610147242708779
424	0.0940352009467011	0.343505609849773	0.110979476502826	0.0425346782627285	0.236436976549185	0.0645144963669355	0.121327376010109	0.0634506163806813	0.0467330093013175	0.0625557344206942	0.0510886146354286	0.0811658710976469	0.0608580096604673
425	0.093912564168852	0.344140499285934	0.111450165222168	0.0422580368965451	0.23664682263409	0.0645332963503334	0.121445972466718	0.0632247837429772	0.0464275275803195	0.0627525898480755	0.0508639406208814	0.0815720953184771	0.0607117670430646
426	0.0937913035719037	0.34448820870929	0.111922488443037	0.0419883984426076	0.236704030326654	0.064561864195857	0.12155190727781	0.063012254548507	0.0461498825541484	0.0629749397853769	0.050647989216124	0.081999220649265	0.0605737524201681
427	0.0936537647214408	0.343628913053334	0.112313877559071	0.041696799934747	0.236098827448252	0.0645625356331573	0.121573509561555	0.0628086456544264	0.0459699932485046	0.0631601632759674	0.0504172650184521	0.0824199676024314	0.06042254208096
428	0.0935095770068662	0.342276615322729	0.11267220908299	0.0413962318273966	0.235223062505652	0.0645518127628734	0.121560666165116	0.0626086802633218	0.0458300323357522	0.0633302224432534	0.0501805068631108	0.0828381093027665	0.0602659419421318
429	0.0933026105212722	0.338400883189703	0.112782133062802	0.0410145941536577	0.23295862026725	0.0644325647969056	0.121342977194527	0.0623855341148769	0.0458787333890452	0.0633051443758594	0.0498760928476375	0.0831717381815399	0.0600452728230203
430	0.0930854242357447	0.334114359409771	0.1128516186052	0.0406197591086463	0.23046811428302	0.0642956499548961	0.121091941270007	0.0621586143547718	0.0459581468554154	0.0632482997818897	0.0495606650874916	0.0834916091591288	0.0598141738699093
431	0.0927934880181044	0.327263837432654	0.112598761527155	0.0401031298149601	0.226573443267568	0.0639951079055097	0.120623025650439	0.0618830068621743	0.0462860793932743	0.0628635233507947	0.0491369160499188	0.0836677048497677	0.059480781500694
432	0.092512431837357	0.320667613258645	0.112355764329383	0.0395884102608904	0.222819941933529	0.0636949385197118	0.120176967048784	0.0616094532138544	0.0466147034627593	0.062467233593787	0.0487143092685699	0.0838392732525965	0.0591493330024918
433	0.0922930291990024	0.315512409968911	0.112168639786492	0.039084512564648	0.219866402127493	0.0633968808942489	0.119860431548632	0.0613475380164407	0.0469472462114594	0.0620057016566069	0.0482981752724889	0.0839851870245017	0.0588288997733638
434	0.0921468151745336	0.312293737131461	0.112161686460622	0.0386473862176937	0.217980188690388	0.0631789743151183	0.119715442391431	0.0611166252653094	0.0471554528760387	0.0616552220979452	0.0479412744307133	0.084180115934657	0.0585675058916642
435	0.0921713745824653	0.313593635349336	0.112575132641136	0.0383660596857452	0.218584403447456	0.0631480868440962	0.119970728034452	0.0609580515555033	0.0470735420110028	0.0615638647558262	0.0477225842823168	0.0844894135007291	0.0584438704872977
436	0.0922932488213747	0.317574852543935	0.113272901876942	0.038203748838778	0.220666585815694	0.0632587484313744	0.120458421317784	0.0608457205796713	0.0467445613822312	0.0616802826012197	0.0476119493183843	0.084881581481711	0.0584233584769262
437	0.092534063409257	0.324833237376752	0.114318177069216	0.0381869016067882	0.224555173042031	0.0635424144232421	0.121230168383716	0.0607899085009186	0.0461136065977826	0.0620506478980172	0.0476333818021301	0.0853750355253605	0.0585288861703266
438	0.0927883081940786	0.332656393661814	0.115434997786296	0.038223380001953	0.228758539595862	0.0638778077653237	0.1220368617288	0.0607416346129429	0.0453479120831794	0.062477537477795	0.0477031661192794	0.0858701254982445	0.0586746005448337
439	0.0930518858276208	0.340872018244199	0.116601536579935	0.0382969151888693	0.233180651106087	0.0642491472321304	0.122867839776347	0.0606985991287276	0.04448858487474	0.0629437066440507	0.047806550863031	0.0863663523033083	0.0588482412570591
440	0.0932348193001252	0.346987258056293	0.117519812462039	0.0383124393972703	0.236455849432396	0.0645232961166192	0.123492860112187	0.0606195187272785	0.0437530196227758	0.0632271838900944	0.0478538449426839	0.0867459381726563	0.058960209383788
441	0.0933894183376702	0.352364524840987	0.118350860834684	0.0383075813699767	0.239328078261654	0.0647632969586721	0.124045516927697	0.0605277738954499	0.0430609383014652	0.0634464720830907	0.0478814314917075	0.0870845420916176	0.0590505087642613
442	0.0934621265800139	0.355248860108635	0.11886152277072	0.0382132109663344	0.240838859223877	0.0648696174752334	0.124367922396303	0.0604051623987677	0.0426054031018046	0.0634447836483826	0.0478240251371104	0.087292603438568	0.0590567279366761
443	0.0935229935830258	0.357764272312636	0.119324733501832	0.0381054200797	0.242147897903419	0.0649561418328875	0.124656695041007	0.0602784694520442	0.0421856466468487	0.0634114599214922	0.0477540584062425	0.0874816630340473	0.0590506356101476
444	0.093542582863796	0.358820294140806	0.119599475081769	0.0379410574591878	0.242653573898565	0.0649640932748549	0.124821272671438	0.0601453812495179	0.0419229151646298	0.0632743704149702	0.0476347564264013	0.0876019079988375	0.058998473768839
445	0.0935590201278334	0.359775595591854	0.11986364731998	0.0377735874560148	0.243101413798351	0.0649683565897498	0.124978767538198	0.0600140127062028	0.0416749977211216	0.0631406138079764	0.0475134134273524	0.0877212851371528	0.058944158194433
446	0.0935620198468516	0.360301510172018	0.120082760785564	0.0375928701899193	0.243302689291597	0.0649568968365989	0.125106067465095	0.05988997534163	0.0414902348636959	0.0630210658779188	0.0473833692411548	0.087836962594181	0.0588806609157691
447	0.0935629641092901	0.360815419295704	0.120312855387679	0.0374191744112525	0.243491546495581	0.0649558729716751	0.125235024958863	0.0597724460438095	0.0413139213830879	0.0629411599473521	0.0472607139524016	0.0879704337369368	0.0588227790907907
448	0.0935599183677794	0.361306023709758	0.120564266313645	0.0372591085787712	0.243656297608642	0.0649751070074275	0.125367200082435	0.0596675500520379	0.0411540096339495	0.062938206133444	0.0471524018175111	0.0881384455637521	0.0587757978523782
449	0.0935550900948312	0.361794148987565	0.12084560413025	0.0371154852559777	0.243813605706501	0.0650172221920979	0.125503347624509	0.0595748122870597	0.0410063389940193	0.0630093208183881	0.0470586743994774	0.0883447546933664	0.0587404552323861
450	0.0935484065340605	0.362279693939891	0.121158090343235	0.0369889755657164	0.243963166992619	0.065083152450132	0.125643629724615	0.0594947290030298	0.040871409100408	0.063157527206219	0.0469801269928663	0.088590924280996	0.0587172262764643
451	0.0935422537494835	0.362766909762115	0.121516369381073	0.0368825065402213	0.244108948967129	0.0651785939828065	0.125790896889256	0.059431984489703	0.0407522376614031	0.0634013889019056	0.0469185534699475	0.0888894076344484	0.0587086180741172
452	0.0935363995265155	0.363255065448656	0.121900406882893	0.0367873103886573	0.244252605078859	0.0652906356074662	0.125942093152698	0.0593789930348968	0.0406419303531143	0.0636990567082608	0.0468665277566057	0.089217317481176	0.0587082340456559
453	0.0935323232526555	0.363731419577921	0.122336096512723	0.0367069036033772	0.244389921543535	0.06543066809457	0.126100899766668	0.0593437365376323	0.0405441486804292	0.0641020202796603	0.0468281508777561	0.0895973763277644	0.0587210632862414
454	0.0935287195981786	0.364204636584364	0.122785516455062	0.0366304281686283	0.244525552785577	0.0655781411906779	0.126261729385209	0.0593131943961699	0.0404496966070818	0.0645329738645527	0.0467934021701006	0.0899912975667209	0.0587374049148015
455	0.0935284974873197	0.364653445974794	0.123287050302799	0.0365592656815205	0.244659767328747	0.0657478693863379	0.126431946491574	0.0592972255404175	0.0403604964837319	0.0650784934483776	0.0467669829984736	0.0904311176761307	0.058763543463938
456	0.0935286054188053	0.365097768334237	0.123794749013319	0.0364878807269134	0.244794068786576	0.0659195550100318	0.12660299067093	0.0592826569191349	0.0402711797403178	0.0656397296369686	0.0467408328909391	0.0908757431140664	0.0587902896361721
457	0.0935297411425053	0.36551572881123	0.124327993713438	0.0364114414459552	0.244929966324632	0.0660960726416068	0.126776085695039	0.0592723185205457	0.0401777963386692	0.0662766007584284	0.0467123193076255	0.0913372490725181	0.0588168763980816
458	0.093530238990375	0.365933559834154	0.124862300990302	0.0363328622288833	0.245066350689143	0.0662710675235398	0.126948048393256	0.059261083824383	0.0400823552229805	0.066921359744448	0.0466814491000634	0.0917976351033591	0.058841834189382
459	0.0935288232107536	0.366351002494875	0.1253997959974	0.0362478632034699	0.245204195533019	0.0664414941565471	0.127116614113795	0.0592471602354997	0.0399807409651712	0.0675897823241472	0.046643509019756	0.0922546613513678	0.0588619050688554
460	0.0935256450087134	0.366775740489014	0.125928716517387	0.0361622984182812	0.245340948593249	0.0666077711320447	0.12728156067644	0.059230694847005	0.0398779050544734	0.0682415268665499	0.0466029712809371	0.0927031492885199	0.058879643910426
461	0.093519823173045	0.367211421483282	0.126444775306708	0.0360758849934296	0.245476063978011	0.0667678236212779	0.127441078502243	0.0592104167590932	0.039773236664443	0.0688682543530079	0.0465585370543508	0.0931388297593868	0.0588938846951426
462	0.093513115637621	0.367660236956073	0.1269381957557	0.0359901947183492	0.245612861211249	0.066918812619306	0.127597658611545	0.0591845442665672	0.0396688368104494	0.0694257626982656	0.0465124623954202	0.0935559842054458	0.0589054918777293
463	0.0935056834387605	0.368119798820381	0.127413093926242	0.0359050961112635	0.245751034502334	0.067062386033621	0.127751835134619	0.0591540945339025	0.0395646566677588	0.0699266372007231	0.0464650455645714	0.0939579809948439	0.0589149442949368
464	0.0934968079947376	0.368580826632562	0.127835668475654	0.0358162987606838	0.245894976449265	0.0671826459487024	0.127898086787485	0.0591091835604437	0.0394590068733719	0.0702723422387899	0.0464127639841629	0.0943177649707102	0.0589171518614564
465	0.0934873430562119	0.369042453212184	0.128236871405168	0.0357259906557192	0.24604127460774	0.0672933834486038	0.128041101521535	0.0590583658829986	0.0393527567987146	0.0705546681998521	0.0463584953933707	0.0946603070931622	0.0589164002636104
466	0.0934743606387927	0.36949943774144	0.128555487883483	0.0356276073901555	0.246191680703348	0.0673670755889696	0.128167115700656	0.0589834222484535	0.0392431150282665	0.0706089086439128	0.0462951559430662	0.094936737627202	0.0589038356099886
467	0.0934607561389926	0.369955451787587	0.128859555117661	0.0355278356388772	0.246342658464636	0.0674342756696903	0.128290105188353	0.0589042670158243	0.0391328955183152	0.0706234021827013	0.0462302329502442	0.0952015164410044	0.0588892050710003
468	0.0934422541549565	0.370390200585026	0.129054233477249	0.0354207453436031	0.246484026466948	0.0674557951980709	0.12838763591278	0.0587969842303196	0.0390201413134257	0.070378841943297	0.046154727751489	0.0953782477599148	0.058860434384292
469	0.0934227030786762	0.370818756014538	0.129229444959868	0.0353123710976365	0.24662203936886	0.0674694524367475	0.128480945323053	0.0586856337134598	0.038906638782305	0.0701002739857527	0.0460772676123607	0.0955387555783587	0.0588288500138019
470	0.0933980299637922	0.371217073235937	0.129309612278454	0.0351977281512297	0.24674367148647	0.0674447232021635	0.128553644787756	0.0585544230964542	0.0387894826584083	0.069655668345525	0.0459902627643521	0.0956200545415841	0.058783528246024
471	0.0933709359642902	0.371608478737734	0.129360090413815	0.0350794335635736	0.246861283178639	0.067407720324983	0.128620946363202	0.0584172358720231	0.0386691075314638	0.0691767375500277	0.045898872662328	0.0956750768005756	0.0587325076710688
472	0.0933386975849753	0.371985196835376	0.129347479034826	0.0349533792382628	0.246970351466746	0.0673446359572854	0.128676777423978	0.058267348356813	0.0385418920230425	0.0686248657995823	0.0457981638955206	0.0956742610630701	0.058669377130862
473	0.0933075135941991	0.372363251837803	0.129313775418186	0.0348264679631528	0.24708112220648	0.067274942234683	0.128730432246385	0.0581187948286945	0.0384145660759438	0.0680820202273301	0.0456961920967997	0.0956527203652671	0.0586038930184648
474	0.093277471857673	0.372742755153747	0.129257221877425	0.0346986283257604	0.247193737268811	0.0671980883776005	0.128781729477224	0.0579716864532587	0.0382871204869448	0.0675489530147873	0.0455928520135058	0.0956087276271416	0.0585358592028614
475	0.0932592970448138	0.373134062072004	0.129213047218189	0.0345802980887195	0.247316923292704	0.0671341016744587	0.128842013642697	0.0578434917428436	0.0381700291923363	0.0671007743424105	0.0454997289521095	0.0955725229605208	0.0584784594610054
476	0.0932480916950607	0.373532301264635	0.129176142695721	0.0344675527375994	0.247446317659101	0.0670776718712502	0.128907575849146	0.0577264050579169	0.0380590189912588	0.066702450844417	0.0454126063638912	0.0955408922406566	0.0584273051275408
477	0.0932615190250622	0.373937424995952	0.129206608847557	0.0343810909446655	0.247587391419003	0.0670648251265503	0.128999732742947	0.0576526134748484	0.0379733345737155	0.0664976047882463	0.0453538487507016	0.0955656108790338	0.0584057920725325
478	0.0932814942825934	0.374344378794514	0.12925498365965	0.0343016159203633	0.247731569827811	0.0670635637518336	0.129098959110602	0.0575903307163244	0.0378943823264787	0.0663441894444589	0.0453026311941653	0.0956053084607411	0.0583921583447087
479	0.0933325281672584	0.374761340317111	0.129435071597802	0.0342599498416732	0.247886356984716	0.0671379176765879	0.129243190307931	0.0575903012731935	0.0378486500293415	0.0664994054553863	0.0452931347128872	0.0957584592329523	0.058422566736025
480	0.0933887423474612	0.375179686698645	0.129641248345416	0.0342247440651419	0.248042709796211	0.067226548625511	0.129395642597521	0.0576015960364556	0.0378084604016107	0.0667141133624064	0.0452909032548019	0.0959341030165439	0.0584607385565864
481	0.0934737369974493	0.375604747692557	0.130006559390873	0.0342259609754554	0.248207059111797	0.0674002342156615	0.129596230879143	0.0576790461143708	0.037799070997416	0.0672869494709155	0.0453300895792395	0.0962470086654611	0.058543480448506
482	0.0935673255469975	0.376026722651927	0.130421421665728	0.034237782047111	0.248371982375611	0.0675999755623692	0.129811113271534	0.0577774308828651	0.037798665872406	0.0679788233137505	0.0453814382314337	0.0966034209599541	0.0586395188248072
483	0.093685373656832	0.376439914282219	0.130977314362715	0.0342797841933562	0.24853853918438	0.0678738756008166	0.130066678902271	0.0579353990014694	0.0378238313881524	0.0690094968619746	0.0454674027395504	0.0970836598610862	0.0587734010412709
484	0.0938179283056959	0.376837954401342	0.131611854037198	0.0343387879982838	0.248699567175949	0.0681890243143995	0.130345481969553	0.0581298923478582	0.0378639183086448	0.0702545900945344	0.0455730878301192	0.0976339644424045	0.0589286909994691
485	0.0939713582180411	0.377214191126344	0.132359568630516	0.03442225760473	0.24885263906472	0.0685635308775677	0.130657724274791	0.0583769463878879	0.0379254774945034	0.0718082384826017	0.0457071513198261	0.0982850952464298	0.0591147872201632
486	0.0941433311878024	0.377562619393406	0.13320312624412	0.0345259729694228	0.248995185375716	0.0689861154939189	0.130999292048299	0.05867555720878	0.0380058882156382	0.0736678450038303	0.0458652643252876	0.0990187181101572	0.0593261748380014
487	0.0943292927798249	0.377890069350094	0.134118986487061	0.034644961449986	0.249129791338564	0.0694449695188117	0.131362982543485	0.0590130617415507	0.0381005202704024	0.0757582620465664	0.0460415199478973	0.0998145718259405	0.0595566419308782
488	0.0945356577400168	0.378208852960553	0.135138833233753	0.0347836611714444	0.249271651453866	0.0699505858302305	0.131760764755737	0.0594155894769964	0.0382140513544892	0.0782293729974636	0.0462422061244981	0.100690842995508	0.0598117487396621
489	0.0947495691514493	0.378524431210078	0.136197140742106	0.0349296513518639	0.249416194611856	0.0704734977818713	0.132171156233205	0.0598421668901439	0.0383345724905173	0.0808412885445299	0.0464519282594243	0.101596857606885	0.0600759688680281
490	0.094983298613081	0.378878364790742	0.137349654313193	0.0350948140800222	0.249601274167216	0.0710346597330278	0.132616174782124	0.0603419127882791	0.038472519370524	0.0838624262409579	0.046684602107931	0.102568499592357	0.0603607473341459
491	0.0952203467119274	0.379239860334226	0.138517152912648	0.0352632539054042	0.24979352981828	0.0716019763507744	0.133066898586621	0.0608538275867579	0.0386133761352969	0.0869504800854402	0.0469211066006547	0.103550631050434	0.0606488918540588
492	0.0954782559774914	0.379669069868309	0.139764849489987	0.0354534726865914	0.250037768969552	0.0722035442939604	0.133551834515295	0.0614407568919475	0.0387723802871482	0.0904306490401769	0.0471814650671087	0.104589839887463	0.0609568396294768
493	0.0957405236016215	0.380107569328471	0.141021477078578	0.0356489154066294	0.250288546361898	0.0728101684840129	0.134042247561179	0.0620400143499662	0.0389357262621973	0.0939628322426038	0.0474467098486124	0.105635574555962	0.0612686895334048
494	0.0960202246600152	0.380583228492953	0.142313828712176	0.0358652538820704	0.25056547671854	0.0734370176615308	0.134554569075905	0.0626885844193011	0.0391164395300372	0.0977030724357918	0.0477314998903147	0.106707412550344	0.0615961479513731
495	0.0963093666340217	0.381062114111366	0.143612731067932	0.0360919317894704	0.25084531898724	0.0740706613775208	0.135074703828535	0.0633526753933505	0.0393061232606711	0.101475609521526	0.0480252749669273	0.107783434535577	0.0619314631892454
496	0.0966152924580065	0.381546735647876	0.144923279151969	0.0363369909092417	0.251130337988487	0.0747163842730168	0.135608728781882	0.0640443590868925	0.0395117544807163	0.105305563305122	0.0483350234389359	0.108866894726766	0.0622807461069469
497	0.0969323992490095	0.382025760495885	0.146227098663861	0.036591061092947	0.251415246391341	0.0753635560148938	0.13614727637856	0.0647435115276368	0.0397256856216796	0.109090241841324	0.048652243531231	0.10994245023422	0.0626371768959328
498	0.0972598269326446	0.382499619169893	0.147524707186079	0.036853449181822	0.251700052703371	0.0760120651534302	0.136689998722931	0.0654495581965678	0.0399472782281059	0.11283312784147	0.0489763605037906	0.111010709110534	0.0630002057199502
499	0.0975908583540241	0.382957906336519	0.148789971017066	0.0371135611246303	0.251979083238525	0.0766470063104759	0.137225448211579	0.0661413151522253	0.0401670668091721	0.116416346207209	0.0492974184385189	0.112050326765076	0.0633605734736586
500	0.097923585651989	0.383408865734966	0.150040013816885	0.0373726019398778	0.25225539576103	0.0772755625350552	0.137757475179888	0.0668263475369304	0.0403860064371278	0.119924426862637	0.0496170368260323	0.113076466197606	0.0637196889589863
501	0.0982509148605158	0.383839268645179	0.151232570025207	0.037617825745016	0.252515387011433	0.0778741432219625	0.138272104479473	0.067472565990214	0.040592922200789	0.123157521145136	0.0499224639378174	0.114053362752705	0.0640653365470962
502	0.0985772158615306	0.384265756033824	0.152414176406577	0.0378604177387049	0.252772269448102	0.0784670142826465	0.138783419937396	0.068111391313703	0.0407975477045846	0.126338237070887	0.0502251879494637	0.115020879712102	0.0644084188214503
503	0.0988967029723336	0.384681106400759	0.153522296539344	0.0380831401792446	0.253010928796167	0.0790186467647292	0.139276627631354	0.0686958742429502	0.0409864550170521	0.129157055007636	0.0505083634228979	0.115924114004387	0.0647332694684655
504	0.0992155970961871	0.385096108680559	0.154618868234835	0.0383029858781189	0.25324966547079	0.0795642867630709	0.139768019683998	0.0692719593827305	0.0411733474695459	0.131920194985716	0.050788769815457	0.116817544828877	0.0650557328851391
505	0.0995313780385557	0.385509283502898	0.155654810634626	0.0385077286832497	0.25348880810984	0.0800784662217721	0.140249879619745	0.0698039561278096	0.0413496619071779	0.134391025680786	0.0510546385334222	0.117659507447445	0.065365663342519
506	0.0998464027439736	0.385924142634968	0.156668111108567	0.0387077536850339	0.253734681321367	0.0805831948989899	0.140728860621631	0.0703208259833774	0.0415228965297326	0.136761848298309	0.0513158487917056	0.118483641088175	0.0656720649611096
507	0.100159820445871	0.386342580925214	0.15763329749008	0.0388977533547064	0.253994856999408	0.0810678406655552	0.141201723889061	0.0708055511987338	0.0416895865452479	0.138920153751043	0.0515671598231653	0.119269888150997	0.065970967797273
508	0.100472762535108	0.386764955441989	0.15856723187679	0.0390825209027588	0.254266902369175	0.0815417491493064	0.141669437134184	0.0712709243507343	0.0418530886206674	0.140947379139258	0.051812832647515	0.120032150611636	0.066266093270168
509	0.100785189377295	0.387191594204171	0.159467309935797	0.039261620319056	0.254551806571646	0.0820040255766759	0.142131571188476	0.0717153327674325	0.0420131370943164	0.142832601124245	0.0520523974141622	0.120768429753246	0.0665571265995221
510	0.101098108379355	0.387622481301875	0.160333503304923	0.0394352191713832	0.254846124963504	0.082454397615766	0.142586401256836	0.072138396651922	0.0421696715948711	0.144570274868622	0.0522854777030645	0.121477973318043	0.0668437545302807
511	0.101411304221343	0.38805575808831	0.161180636535993	0.0396057239564772	0.255145738836893	0.0828980734364489	0.143037122833109	0.0725494542370441	0.0423242294855603	0.146224952727656	0.0525149104732353	0.122172478120884	0.0671279044243294
512	0.10172174161166	0.388480845134753	0.16197840361167	0.0397671854086125	0.255441466366109	0.0833205244520934	0.143473629204903	0.0729319589884522	0.0424720634741607	0.147699223911799	0.0527335150093445	0.12282734782542	0.067402189101165
513	0.102031531957758	0.388904011131073	0.162764590971885	0.0399265255851155	0.255736282283728	0.083737996809766	0.143906801146016	0.0733077661615817	0.04261832025116	0.149131177480846	0.0529495795893158	0.123472920408132	0.0676741597147038
514	0.102341674249931	0.389305795129835	0.163489635860623	0.0400738489287945	0.256011669515774	0.0841293303344699	0.144326828783909	0.073654845184315	0.0427563990539	0.150373327239834	0.0531538313396561	0.12407064843475	0.0679353582595354
515	0.102652200446175	0.389702890335424	0.164204231843754	0.0402191874861858	0.256282806032217	0.08451638711199	0.144744862048223	0.0739979294422508	0.0428933238174089	0.151586753304879	0.0533563648215323	0.124660007864537	0.0681949527757148
516	0.102965223001281	0.390073032310063	0.164861555717954	0.0403537304701323	0.25652951677386	0.0848802327601856	0.145152268940215	0.0743202256170201	0.0430242180608623	0.152647236896668	0.053549844124951	0.125203264868056	0.0684460422261808
517	0.103280113433131	0.390438758922353	0.165504281692172	0.0404860835683872	0.25677144245828	0.0852388839196318	0.145557549214248	0.074637984504798	0.0431543623939681	0.153664848393959	0.053741712726303	0.125733941748627	0.0686958469841697
518	0.103599576942526	0.390793675509586	0.166111267980226	0.0406130752223626	0.257001653002604	0.0855848175376569	0.145957622940862	0.0749446348623555	0.0432826707396711	0.154577497177132	0.053929637884664	0.126233819017841	0.0689425064605771
519	0.103921177182165	0.391157159082215	0.166703351834332	0.0407379848410776	0.257236413037866	0.0859255158335524	0.146355380036596	0.0752451140737411	0.0434101910552756	0.155431699948138	0.0541157419924113	0.126718845084918	0.0691882222172352
520	0.104245285757308	0.391530699550745	0.167277941526846	0.0408604503314436	0.25747651377988	0.0862600683165134	0.146750417609121	0.0755383488961422	0.0435367862920687	0.156217292183123	0.0542997083450903	0.127186437132096	0.0694328301289703
521	0.104571563686034	0.391935591883038	0.167845270169925	0.0409804674231487	0.257735272741964	0.0865921605377148	0.147146764539729	0.0758247000567806	0.043661382159913	0.156948229680524	0.0544818581723683	0.127645143638611	0.0696771670502684
522	0.10489917121857	0.392359699873766	0.168408148492381	0.0410989838834165	0.258005467387316	0.0869227448565475	0.14754391398013	0.0761068321989191	0.0437847526080789	0.157645669112954	0.0546628946453683	0.128098404168591	0.0699213378806535
523	0.105224700670944	0.392811187266762	0.168965558546593	0.0412152497249298	0.258292262715288	0.0872527796204447	0.14794219639679	0.0763793604509387	0.0439049851073437	0.158301302201631	0.0548422754259819	0.128549703697073	0.0701642547124303
524	0.105549643998145	0.39327039705527	0.169521426268736	0.0413308807765379	0.258583740287078	0.0875826593816678	0.148340798370858	0.0766491799134375	0.044024332544098	0.158945143757454	0.0550211892164353	0.129000450122568	0.0704068178522919
525	0.105864194900226	0.393720569598059	0.170060800522573	0.0414448817438026	0.258867855858434	0.0879084697583518	0.1487319398573	0.0769030986540042	0.044140718457912	0.159541046890747	0.0551975258013125	0.129446774187671	0.0706452681741091
526	0.106177584229547	0.394166591180749	0.17059772956629	0.0415587984533905	0.259149040057854	0.0882339118170427	0.149121991195941	0.0771547382765918	0.044256975138733	0.160128535092956	0.0553736975717429	0.129892460116828	0.0708835199158152
527	0.106486000861739	0.394582876119137	0.171121898171561	0.0416727275925246	0.259409641807961	0.0885581067441431	0.149506399201883	0.0773947088836267	0.0443734473341502	0.160668352822152	0.0555496333137853	0.13033486615216	0.0711219163553112
528	0.106793801835153	0.394989210072832	0.171640509338154	0.0417859032693793	0.259663641959359	0.0888809354132882	0.149888871518603	0.0776314465416168	0.0444896828553481	0.161189550594228	0.0557248533476046	0.130773878869176	0.0713601356423405
529	0.107100019685994	0.39536995578017	0.172144829948146	0.0418971414718013	0.25990066657122	0.0892002508476907	0.150266366348754	0.0778598709020631	0.0446053097856962	0.161662868476565	0.0558982329888504	0.131204165910522	0.0715978993944554
530	0.107408363666198	0.395743589034983	0.17264419272344	0.042007699971537	0.260131934519041	0.0895201244993969	0.150644383491599	0.0780860155724744	0.0447207949434139	0.162113300302195	0.0560714782982145	0.131632295134453	0.0718371023566573
531	0.107719413629227	0.396108170077489	0.173137245527298	0.0421173933951264	0.26035587580354	0.0898407086094896	0.151023065396055	0.0783092588192045	0.0448360996632381	0.162534604419289	0.0562445526397293	0.132057678045309	0.0720781370407882
532	0.108028468160112	0.396466036945999	0.173623814540963	0.0422251678071198	0.260573311148667	0.0901607956945305	0.151399462187135	0.0785262193043939	0.0449489334909456	0.162930846600421	0.0564159502964934	0.132481457612063	0.0723189275387673
533	0.108336246922905	0.396819611145888	0.17410623818057	0.04233171531006	0.260786586958786	0.0904805650094562	0.15177439800409	0.0787391629420408	0.0450601875679556	0.163311065576594	0.0565862759744824	0.132904212089966	0.0725595619177312
534	0.108640723384372	0.397174496882969	0.174591210269433	0.0424376133530403	0.260999500607677	0.0908035761273894	0.152150520128865	0.0789430896724227	0.0451694820342859	0.16366968444379	0.0567570224384043	0.133332498260023	0.0728021986096455
535	0.108944213444144	0.397529774377911	0.175076943583399	0.042543317401487	0.261212306078537	0.0911275555760912	0.152526996605328	0.0791443230408942	0.0452781911623613	0.164021851330382	0.0569278945916307	0.133762436753712	0.0730454333950384
536	0.109242259314503	0.397885644709397	0.175566100777062	0.0426506230567829	0.261431527076459	0.0914560668941681	0.152908039572823	0.079333693054904	0.0453872779855777	0.164348125520653	0.0571012854527488	0.134197154163376	0.0732922352558495
537	0.109539188236754	0.398240146585407	0.176054603905614	0.0427581805482014	0.261651429695805	0.0917850996041962	0.153289732871083	0.0795208736473486	0.0454963879621255	0.164669281214081	0.0572749667085304	0.134632065135544	0.073539559957671
538	0.109829891636061	0.398583270247467	0.176536046820932	0.0428669484873409	0.261873534010891	0.0921160104059238	0.153674329613221	0.0796964665516582	0.0456054902129134	0.164962395664995	0.0574496967570974	0.135066074176153	0.0737892727345614
539	0.110118703838563	0.398921707579182	0.177013151349792	0.0429750597063475	0.26209452027881	0.0924471118000282	0.154059446406379	0.0798679594925673	0.045713322945412	0.165245398751307	0.0576237517003649	0.135500214122811	0.0740394266856144
540	0.110402402805261	0.399247474462185	0.177478526167116	0.0430813953486982	0.262312483678464	0.0927787284994478	0.154445969263405	0.0800283673472453	0.0458177232766097	0.165501063703695	0.0577959813589336	0.135934708000637	0.0742907734408849
541	0.110682754455157	0.399573612356534	0.177933780776993	0.043184559143501	0.26253092831776	0.0931084452497045	0.154832189841876	0.0801807618719806	0.0459182156732317	0.16573612382275	0.0579653753740306	0.136367563801615	0.0745413730774847
542	0.110958845883669	0.399900222447142	0.178376155122845	0.0432836860414248	0.262749985443875	0.0934357438828447	0.155218025702184	0.0803229576131526	0.0460137343349393	0.165944959608471	0.0581311603883457	0.136798334777513	0.0747910218357766
543	0.111234582778763	0.400249460214189	0.178808023982847	0.0433790910437246	0.262980485111606	0.0937614057162757	0.155607792782337	0.0804564826117867	0.0461058727759189	0.16612472723048	0.0582946044482631	0.13722497168368	0.0750413695973593
544	0.111510093004949	0.400613164856337	0.179233176220748	0.0434721164734125	0.263218300502666	0.094086021071204	0.156000073265342	0.0805844640209296	0.046195850092171	0.166285910288803	0.0584565518324181	0.137648965496083	0.0752921642626855
545	0.11178722991509	0.401016122709788	0.179646190065164	0.0435607878942478	0.263477200691247	0.0944081363239779	0.156398857966851	0.0807032611109146	0.0462824075312572	0.16640940119092	0.0586161936210428	0.138062139914286	0.0755443869686685
546	0.112064825633526	0.401430151981811	0.180055780260136	0.0436482312613041	0.263742047874002	0.0947295464197339	0.156799477191527	0.0808194677519064	0.0463680003896045	0.166522260972057	0.0587751851134922	0.138472262708483	0.0757970124553495
547	0.112347364832901	0.401881105796493	0.180457224841647	0.0437323311516519	0.264034938688631	0.0950529854879835	0.157211314063173	0.0809271055573456	0.0464494078246682	0.166597698752354	0.0589341181713945	0.138876139257593	0.0760555799691467
548	0.112630388763965	0.402336975591147	0.180857151368775	0.0438157665947205	0.264332417083416	0.0953768035961084	0.157624802797196	0.0810330480421532	0.046529797612155	0.166667792955728	0.0590929602864405	0.139279355584843	0.0763150961255445
549	0.112914781598778	0.402813550784889	0.181249002184702	0.0438955527637327	0.264652530290745	0.095702640636811	0.158045863346658	0.0811296991399011	0.0466041152298216	0.166713979019758	0.0592510967690992	0.139680455934134	0.0765792189565238
550	0.113199030888179	0.403297578017735	0.181639476109806	0.0439742873399645	0.264979124653674	0.0960297904756539	0.158469388702434	0.0812230695648895	0.0466765573567359	0.166756445120736	0.0594091252995945	0.140082885585322	0.0768448618122284
551	0.113482911060802	0.403800767636846	0.182026409458505	0.0440503178204753	0.265322384845291	0.0963603160811434	0.158899252131587	0.0813080039742106	0.0467441767931447	0.166789345602437	0.0595668762388124	0.14048873344139	0.0771144133029412
552	0.113767103190098	0.404314114426184	0.182414319842218	0.0441252794831996	0.265673741627094	0.0966939552197433	0.159334441981051	0.0813879113472462	0.0468097281478391	0.166817925281748	0.0597251272365688	0.140899585221357	0.0773871074251489
553	0.114051676599773	0.404839875534689	0.182803424379835	0.0441989348130737	0.266034994241348	0.0970313997877005	0.159776141899784	0.0814616745648216	0.046872751847105	0.16684122398036	0.0598839894169831	0.141316552908311	0.077663642541406
554	0.114339457475552	0.405367617615015	0.183199161413262	0.0442726570070324	0.266407552921753	0.0973746715761607	0.160228533985364	0.0815306080690699	0.0469348178675737	0.16685839546431	0.0600451272056352	0.141742839746774	0.0779464298531181
555	0.114629204217655	0.40589657383936	0.183598963524766	0.0443464201822044	0.266787041126575	0.0977215148868648	0.160687479334495	0.0815965814264401	0.0469962969236184	0.16687181155863	0.0602076597219168	0.142174838323258	0.0782330491555929
556	0.114928368599813	0.406431466900838	0.184011348520363	0.0444231299470104	0.267187904736984	0.0980788054532115	0.16116501597881	0.0816611502217251	0.0470596801094783	0.166877905490346	0.0603757797174414	0.142621294290303	0.0785306212530181
557	0.115230036405278	0.406967938108896	0.184427078333252	0.0445006229824787	0.267594450417233	0.0984388731381468	0.161647494612984	0.0817253456524052	0.0471235694564284	0.166882053024408	0.0605453849922584	0.143071593361168	0.0788311048528986
558	0.115547052181908	0.407542204691306	0.184860779497499	0.0445835461018421	0.268033961818265	0.0988143119990531	0.162155820497332	0.0817900724507531	0.0471916364466954	0.166874771422535	0.0607229639587284	0.143542257945907	0.079146401105971
559	0.115866997573992	0.408126880586462	0.185298164533781	0.0446673842990575	0.268479194705375	0.099192494241197	0.162668794266771	0.0818547467058074	0.0472604534045559	0.166865093784319	0.0609019469009386	0.144016541661367	0.0794643640734686
560	0.116202269131389	0.408770679710604	0.185755191933008	0.0447558323208118	0.268953525173327	0.0995847498414006	0.163205665707058	0.0819189211551438	0.0473331244565408	0.16684256810425	0.0610881022475465	0.144509366867979	0.0797960430630569
561	0.116543238601856	0.409435736188688	0.186219854273922	0.0448456461780617	0.269435727537798	0.0999815717409437	0.163750891151899	0.0819828536080927	0.0474073335191866	0.166815283382823	0.0612768873458155	0.145007974946808	0.0801328511543564
562	0.116897503202821	0.410150393159303	0.186702331478773	0.0449386469848011	0.269936297660812	0.100389048338946	0.164315609274031	0.0820462214028041	0.0474851312733744	0.166776894231558	0.0614718085312939	0.145520076394146	0.0804816271496485
563	0.11726094384231	0.410898020879004	0.187195346676305	0.0450327019765	0.270450586570749	0.100802999336926	0.164894992082454	0.0821089315525431	0.0475648276152944	0.166729649186079	0.0616705840378529	0.146039880802127	0.0808385332687632
564	0.117634731929496	0.411682828379588	0.187700245142177	0.0451279457299617	0.27098034560211	0.101224251254029	0.165490911664778	0.0821709001026323	0.0476466649178485	0.166672417706697	0.0618737059064813	0.14656837152743	0.0812046073998478
565	0.118013269828717	0.412492720489889	0.188207545689413	0.0452201208103805	0.271528380420561	0.101647084017419	0.166098932465475	0.0822279324425439	0.0477260875238479	0.166601910518889	0.0620766992891682	0.147097457880479	0.081574633686348
566	0.118394365319033	0.413316119697728	0.188716139665077	0.0453106435283917	0.272086256047447	0.102070768005732	0.166713469306833	0.0822823068231291	0.0478042099086256	0.166524254872698	0.0622796234871174	0.147626864956161	0.0819467880565335
567	0.118774452001561	0.414144420547657	0.189219553151207	0.0453929099713483	0.272668889591737	0.102492519458793	0.167337436843798	0.0823252520936159	0.0478731586167588	0.166429738943067	0.0624775401234805	0.148151194677172	0.0823187184074041
568	0.119154317238477	0.414973797367802	0.189721829456708	0.0454733640612442	0.273256957800824	0.1029138466968	0.167963474533457	0.0823656885350568	0.0479400935909944	0.166331521975609	0.0626743575390077	0.148674409856914	0.0826905995833031
569	0.119526837629392	0.415782642201107	0.19021587053212	0.0455434752640715	0.273862030095279	0.103330861248648	0.168592887154694	0.0823908346281488	0.047994936632517	0.166214215306547	0.062863598012011	0.149191540630456	0.0830589975842925
570	0.119897995421376	0.416588798364591	0.190709114498789	0.0456120328898375	0.274468504139009	0.103747507922573	0.169222673429785	0.0824134471088975	0.0480481871934783	0.166093559451547	0.0630517932358726	0.149709088948929	0.0834269217015195
571	0.120262389068379	0.417381927828994	0.19119861036131	0.0456729827224675	0.275081435634634	0.104162451940462	0.169854242413971	0.082423568976651	0.0480937184703488	0.165956332703029	0.063234902709299	0.150229152036189	0.083792542642815
572	0.120621126453382	0.418169787684504	0.1916836973376	0.0457302305678517	0.27569272926425	0.10457496435575	0.170482142692813	0.0824275410862141	0.0481358268200209	0.165811549103401	0.0634147307569874	0.150749239707552	0.0841550731155932
573	0.120968884035677	0.418947418299222	0.192160225887678	0.0457802922026997	0.276300843506906	0.104982756601282	0.171102921367163	0.0824195754298783	0.0481712906639546	0.165652096322209	0.0635881889782431	0.151269375100995	0.0845116044436025
574	0.12130574533787	0.419714639259622	0.1926271290043	0.0458258534576591	0.276902318629759	0.105387744820201	0.171714652148018	0.0824012040861898	0.0482018086218363	0.165477221843545	0.0637571459273375	0.15178928385978	0.0848640840455471
575	0.121632137665063	0.420471858787443	0.193084784155443	0.0458670908182155	0.277497414990448	0.105790038974334	0.172317689854731	0.0823728351213192	0.0482275746499818	0.165287530439861	0.0639217781247474	0.152308974871542	0.085212670812645
576	0.121941255837938	0.421201336212369	0.193527264104136	0.0459077525598718	0.278070142676598	0.106191801807004	0.17290289568944	0.0823316584264276	0.0482500070110061	0.165073832269697	0.0640838981402988	0.152828806904888	0.0855589847665315
577	0.122242244997017	0.421917758530051	0.193962602781089	0.0459481434220456	0.278632343927673	0.106593314606043	0.173479710054972	0.0822844545644673	0.0482708705875028	0.16484883679766	0.0642448359526228	0.153348705301331	0.0859042291612596
578	0.122517001762377	0.422583364478527	0.194374382524437	0.0459954210858066	0.279149006236652	0.10699561125388	0.174024406844329	0.0822254315978495	0.0482935141112353	0.164599463652342	0.0644068760035293	0.15386676697315	0.086247601802401
579	0.122786704322141	0.423239360883869	0.194781841767548	0.0460441478888187	0.279656948424625	0.107398291073892	0.174563022272928	0.0821641658000023	0.0483166134986751	0.164345426207791	0.0645692604694915	0.154384785477272	0.0865907670619865
580	0.123031063500468	0.423852124035577	0.195173608835675	0.0461034810603486	0.280122637255728	0.107809234287806	0.175074060015486	0.0820925924285531	0.0483450836097538	0.164068889910963	0.0647369793168493	0.154911075946922	0.0869370790829362
581	0.123271143444324	0.424459822633441	0.195565699125299	0.0461640713019318	0.280583575546467	0.108222483214453	0.175582261804594	0.0820189270905825	0.0483741260635142	0.163788179579162	0.0649055484904453	0.1554410225653	0.0872843147066717
582	0.123494106450296	0.425047263015924	0.195959082300914	0.046229689823728	0.281025511675748	0.108644954992034	0.176079119779901	0.0819368938865268	0.0484054578880016	0.163490773107466	0.0650775189689944	0.155985593778588	0.0876352447415501
583	0.123708344025544	0.425622127440658	0.196357491857634	0.0462947380415223	0.28145891819325	0.109069743324323	0.176571550678926	0.0818502802904286	0.0484354814153677	0.163188820032684	0.0652485758161253	0.156537280588432	0.0879852312168889
584	0.123908345371716	0.426176473197486	0.196764102351949	0.0463588557633135	0.281878407975744	0.109498311298504	0.177056758453494	0.081756193423103	0.0484633703526936	0.162879448816027	0.0654181420014683	0.157100577055814	0.0883336782003474
585	0.124092445877604	0.426705471470638	0.197177782177868	0.0464193927647496	0.282278108951308	0.109926584465193	0.177531741171898	0.0816534509756174	0.0484863374727697	0.162570446823639	0.0655827896152995	0.157672700879782	0.0886759441221664
586	0.124264052866126	0.42721455386376	0.197597016478621	0.0464771163430495	0.28266226157857	0.110354625997423	0.177998689917603	0.0815439077151489	0.048505437450721	0.162261734936033	0.0657435726372286	0.158251760483924	0.0890133534955544
587	0.124414219554035	0.427702014658114	0.1980245552378	0.0465298432287513	0.283015948862442	0.110783114486817	0.178451327750608	0.0814200461624081	0.0485167999506516	0.161956413084241	0.0658970514800672	0.158843749408983	0.0893426202164137
588	0.124556456267745	0.428181478422786	0.198455165508999	0.0465807220226702	0.283358368142596	0.111211768289135	0.178898672506313	0.0812908888029365	0.0485253006436431	0.161652345081313	0.0660478287772146	0.159440520411643	0.0896688752712691
589	0.124671643128117	0.428643524248053	0.198882010802261	0.046624042162855	0.283659142744439	0.111633463370168	0.179320183395592	0.0811457003659172	0.0485241536614126	0.161345003689723	0.066187275414868	0.160037211776984	0.0899809782172501
590	0.124782063704956	0.429101596466628	0.199307689214085	0.046665952919887	0.283952554580191	0.112054098784814	0.179736963105541	0.080997628184758	0.0485212515014114	0.161035135645505	0.0663247877047763	0.160633715184063	0.0902907218272797
591	0.124868437513711	0.429533782721732	0.199724230634593	0.0467002527010087	0.284208659707056	0.112470462625609	0.180128716727635	0.0808346260946299	0.0485091377023817	0.160699934126021	0.0664529420643819	0.161228147647627	0.0905894291537406
592	0.124948837334169	0.42994934944388	0.2001369901435	0.0467331661036937	0.284454860500999	0.112885384948143	0.180513174939391	0.0806689264975118	0.0484951756949182	0.160356687364069	0.0665791772924592	0.161821546681269	0.090885279950963
593	0.125012234264856	0.430317614418386	0.200538985750156	0.0467621336600591	0.284672872039701	0.113296204487932	0.180876869290954	0.0804955493804992	0.0484759534019126	0.159990542604321	0.0666999503769563	0.162412004414363	0.0911730006265065
594	0.125067994146133	0.430653919308417	0.200937413127811	0.0467909133092981	0.284876299067084	0.113704829484248	0.181230086764864	0.0803208079746408	0.0484556630254995	0.159617240662702	0.0668192167859406	0.163003235199006	0.0914569802752243
595	0.125114034146341	0.4309495477273	0.201331299123101	0.0468194538040127	0.285061163989149	0.114110661425236	0.181569970030851	0.0801443302011607	0.048434013270204	0.159234829580519	0.0669365656079089	0.163595449867438	0.0917361986170729
596	0.125151938713335	0.431222211223635	0.201729119237617	0.0468479959739559	0.285232903568106	0.114516185333314	0.181900921210189	0.0799664924255887	0.0484115594505673	0.158846543990935	0.0670528015511287	0.164195166601758	0.092012052789902
597	0.125184641937784	0.431480192228506	0.202129454608688	0.0468765392149469	0.285396251534256	0.114921512302318	0.182226161711177	0.0797877851404825	0.0483885915570076	0.158454502568752	0.067168325981706	0.164799679738859	0.0922857561005709
598	0.125207482058157	0.431735934071472	0.202538353415027	0.0469025668105116	0.285546121743791	0.115324064322958	0.18253943537647	0.0796080737769216	0.0483635572795908	0.158059362538915	0.0672799448523946	0.165410739908665	0.0925517918029956
599	0.125227700340739	0.431991080694186	0.202949528577578	0.0469279256902035	0.28569240925853	0.115725878699097	0.182849527984172	0.0794280955064297	0.0483379737102625	0.157663398828563	0.0673905255362773	0.166023540428938	0.092815789280444
600	0.125239451949925	0.43225687478292	0.203369843246622	0.0469470554609091	0.285827078833988	0.116122644872501	0.183145693240284	0.079248067515864	0.0483074667663061	0.157260514889813	0.0674945122653047	0.166639963328523	0.0930697651072427
601	0.125250716826309	0.432524494065149	0.20379087404827	0.0469651891170248	0.285960218743063	0.116518474876171	0.183439839974069	0.0790687623780265	0.0482762799781307	0.156856008505727	0.0675976118642399	0.167256292246784	0.093322374488598
602	0.125260707400123	0.432800590059765	0.204214361165493	0.0469787698233109	0.286086726676321	0.116909884654576	0.183724989290725	0.0788935621194763	0.0482421035988523	0.156443521088266	0.0676968400342251	0.167871453754228	0.0935689970508715
603	0.125271685591947	0.433078062046452	0.204637264661226	0.046992551929708	0.286212325391398	0.117300534386719	0.184008133525568	0.0787216221891538	0.0482087499603859	0.156028244897909	0.0677962372403586	0.168486127578476	0.0938147227700002
604	0.125284668947609	0.43335832771401	0.20505898322848	0.0470067429393609	0.286336078118047	0.117689640994634	0.184287206836727	0.0785563017131117	0.0481770667350836	0.155607306653492	0.0678959776410963	0.169099811258055	0.0940586276257744
605	0.125299840132462	0.433638436325803	0.205480556684885	0.0470254624929121	0.286459925637029	0.118079537869248	0.184563918591211	0.0783983340304533	0.0481506032979859	0.155186565497513	0.0679986621375933	0.169715014542515	0.0943025680381392
606	0.125317113349285	0.43391839404088	0.205901990721063	0.0470485330004047	0.286583864230996	0.11847019401971	0.184838361399086	0.07824743079634	0.048129154951516	0.154766013701015	0.0681041752751139	0.170331677839511	0.0945465426127186
607	0.125338222576507	0.434196996998031	0.206330576171909	0.0470803485504805	0.286704900557919	0.118867444909578	0.185112374073284	0.0781068298855479	0.0481172506992322	0.154342137761948	0.0682164217035563	0.170959826863293	0.0947941559108784
608	0.125361136985093	0.434474962422039	0.206762526994362	0.047116279414713	0.286824571112115	0.119267799206226	0.185386184331635	0.0779710771269069	0.0481098377853888	0.153916697520495	0.0683318367394913	0.171593380934976	0.0950434815495467
609	0.125390666709794	0.434738321624141	0.207201923897304	0.0471600797023123	0.28692877347394	0.119673098799888	0.185656823667946	0.077848938144555	0.0481125842230922	0.153483308439103	0.0684533688683343	0.172236256146371	0.0952957397425574
610	0.125421636639572	0.434998202768895	0.207642655088119	0.0472052747310848	0.28702970000686	0.120079206170313	0.185926793651591	0.0777295497863646	0.0481172357602678	0.153048024798551	0.0685760100265646	0.172880632850039	0.0955485160588191
611	0.125461325604996	0.435231676706626	0.208086317524624	0.0472531978939276	0.28711244051392	0.120485379022635	0.186193087889924	0.0776229877006875	0.0481279173345454	0.152598327670956	0.0687013685503544	0.173524627892158	0.0958022699114911
612	0.125503002268382	0.435462200531076	0.208529677704434	0.0473012120786805	0.287194389446249	0.120891296758856	0.186459383343959	0.0775187621886575	0.048139306272344	0.15214458996764	0.0688271704408649	0.174167680350251	0.0960563142327859
613	0.125551726224541	0.435682264862984	0.208971966246873	0.0473495489774783	0.287273531886347	0.121296309992537	0.186725683108212	0.0774228208922858	0.0481532031353534	0.151676526586773	0.0689545442679304	0.174807390919524	0.0963113883973793
614	0.125603148744072	0.435902161533213	0.209410661886314	0.0473984459197256	0.287355258645598	0.121699526164021	0.186991299381589	0.0773313316340378	0.0481686495044396	0.151206061406649	0.069082848775393	0.175442888967846	0.0965663045994402
615	0.125658454562114	0.436121816934196	0.209844187250707	0.0474481487781562	0.287440704303141	0.122100156319174	0.187255932094922	0.0772462489672361	0.048186325650563	0.150732139978811	0.0692124925546465	0.176072325095776	0.0968209934895638
616	0.125716449764997	0.436341932530491	0.210275385709543	0.0475009172393518	0.287527096011123	0.122501600584564	0.187520099850026	0.077166682052046	0.0482079527992105	0.150255059210978	0.0693448391793767	0.176701754939233	0.097077080291023
617	0.12577631386243	0.436562367923528	0.210704967166211	0.0475558160346722	0.287614145143986	0.122903610587578	0.187783944498563	0.0770909481167895	0.0482323255597814	0.14977578296959	0.0694790640526584	0.177331180415515	0.0973341385223934
618	0.12583811665814	0.436772115088303	0.211132562240844	0.0476153067452502	0.287690906652062	0.123307205662105	0.188044383910869	0.0770201947018825	0.0482618288789635	0.149289907096702	0.069615742886508	0.177962223896383	0.0975926419802
619	0.125900498545543	0.436978669665415	0.211559563980583	0.0476761690668792	0.287764595233253	0.123711274199552	0.188303806174689	0.0769509289748721	0.0482928647026659	0.148802059905314	0.0697531547215663	0.178593750677321	0.09785157712902
620	0.125963448438627	0.437162605739397	0.211980862081666	0.0477397348406709	0.287816208262299	0.124114125647841	0.188555940527695	0.0768850456086346	0.0483271882465181	0.148306438552324	0.0698905793550926	0.179223874701222	0.0981095911939443
621	0.126026439336181	0.437342618140116	0.212400087142526	0.0478031712882429	0.287864734600127	0.124516050606348	0.18880663545119	0.0768197186694265	0.0483616213204115	0.147809609997815	0.0700276838207237	0.179852848376479	0.0983670202440602
622	0.12608950458149	0.437504338953254	0.212807447754293	0.0478647900168702	0.287900379449908	0.124912203901478	0.189050264266425	0.0767569241532651	0.0483956293801554	0.147307440746745	0.070162641116324	0.180474617653168	0.0986208586254345
623	0.12615333099747	0.437664322667764	0.213210266206482	0.0479251250872052	0.287938158230858	0.125306053274732	0.189293391876683	0.0766953152871212	0.0484291579194544	0.146801613625389	0.0702970786333738	0.181093433513321	0.0988737320631658
624	0.12621885163204	0.437820439936939	0.213602974690575	0.0479826029826312	0.287980686729571	0.125694774563813	0.189535403901668	0.0766363454484355	0.0484616191390533	0.146287644792749	0.0704303592239729	0.181705675639893	0.0991244577231113
625	0.126285779513368	0.437982660835933	0.213988334899612	0.0480384257609704	0.288031843659887	0.126078096926161	0.189777865958955	0.0765795678499721	0.0484936045201756	0.145768375638046	0.0705628335076572	0.182309842193037	0.0993732467614923
626	0.126354114641455	0.438150985364746	0.214366346833593	0.0480925934222227	0.288091629021807	0.126456020361776	0.190020778048545	0.076524982491731	0.0485251140628212	0.14524380616128	0.0706945014844268	0.182905933172752	0.099620099178309
627	0.126423364427349	0.438332118782292	0.214739960090912	0.048146190058652	0.288158738649775	0.126828816012754	0.190264557730064	0.0764715903820112	0.04855638117861	0.144708963264423	0.0708256435791912	0.183494776933496	0.0998654869897858
628	0.126493044640446	0.438519279912184	0.215111503382742	0.0481995179775176	0.288229294991179	0.127199198588608	0.190508745690139	0.0764187598010074	0.0485875342111719	0.144169285816934	0.0709565382000707	0.184080210238253	0.10011018557522
629	0.126560674236554	0.43869847936567	0.215479765344067	0.0482527946720957	0.288291857896401	0.127565066649128	0.190750246960055	0.0763651828184198	0.0486179273924542	0.143615955867141	0.0710860269840172	0.184659736309711	0.100352834038409
630	0.126627669387191	0.438874204427347	0.215846917325369	0.0483059361985888	0.288352034177242	0.127929773870761	0.190990879944576	0.076311422592184	0.0486480655173612	0.143060088192346	0.0712150191979894	0.185237671276101	0.100594833887953
631	0.126688952679924	0.439008541694938	0.216203128917793	0.0483566679693787	0.288391588478814	0.128286388654489	0.191223325501761	0.0762564893740913	0.0486757078088189	0.142498231249656	0.0713389248687757	0.185803646456172	0.100830851154026
632	0.126749271183676	0.439136540964248	0.216556940524986	0.0484067406119492	0.288427437708937	0.128642375542137	0.191454542258019	0.0762017076275201	0.0487028936866789	0.141936600194515	0.0714619484041418	0.18636856606866	0.10106631610235
633	0.126806359741711	0.439243321717577	0.216902717399012	0.0484546066078724	0.288450883004207	0.128996260342911	0.191681645202479	0.0761474329812601	0.0487285515711901	0.141375725371602	0.071582018703536	0.186929951824456	0.101299931986907
634	0.126863924920449	0.439360984459927	0.217247271475194	0.0485029532604686	0.288475289018804	0.129352013934179	0.191909582950697	0.0760947192731469	0.0487550624897088	0.140818529280935	0.0717026762883085	0.187494038055874	0.101535115112463
635	0.126922175968004	0.439494306649892	0.217590065915455	0.0485519915897405	0.288501077531947	0.129710456760546	0.192138722001885	0.0760442517930986	0.0487828009449699	0.140266626975695	0.0718241789910646	0.18806201033758	0.101772553536042
636	0.126982285681683	0.439650200962347	0.217931702559128	0.0486029422704121	0.28853146581493	0.130069464843399	0.19237011637385	0.0759964256164881	0.0488123766672926	0.139725574443859	0.071947277715043	0.188630959521106	0.102011623493702
637	0.127043634506113	0.439821143356463	0.218272567338407	0.0486551678520169	0.28856492061114	0.13042884976391	0.192603014292999	0.075950360308836	0.0488431772343232	0.139191755094292	0.0720714404531697	0.189200559972513	0.10225178114075
638	0.127107738683043	0.440000743100251	0.218613607171927	0.048709209144762	0.28860144523583	0.130788320383761	0.192842241036001	0.0759057738694454	0.0488749448512593	0.138661965691526	0.0721977571923112	0.189771693111337	0.102494341631883
639	0.12717262001068	0.440182784660614	0.21895469637972	0.0487637625611622	0.288638835709578	0.131147815175221	0.193083252831884	0.075861604546744	0.0489069852258611	0.138133312940422	0.0723246814702005	0.190343258546613	0.10273757984827
640	0.127239844498536	0.440354956510839	0.219285570294083	0.0488182129694711	0.288678088327639	0.131501062856346	0.193328632349683	0.0758183976002182	0.0489384695573113	0.137602020270129	0.0724514174420913	0.190905524645953	0.102979766430924
641	0.12730726902458	0.440524707336974	0.219612736587244	0.0488724636546109	0.288717746559312	0.131852475511588	0.193573759748729	0.0757753325688517	0.0489698865499941	0.137069290173103	0.0725777305333601	0.191464373620386	0.10322121415844
642	0.127375363289533	0.44068335034266	0.219922096537873	0.0489256825186537	0.288759231903965	0.132195268631332	0.193816854332364	0.0757328563299598	0.0490010402995052	0.136529442232401	0.0727018540768228	0.19200679263278	0.103458953651437
643	0.127442961421708	0.440838051596649	0.2202238510854	0.0489784997034461	0.288800294250601	0.132535442595439	0.19405778385867	0.0756899596460063	0.0490320681300361	0.135982540673475	0.0728249826362364	0.19254284986226	0.103695585307328
644	0.127509596472611	0.440985101214989	0.220510842203375	0.049030537157929	0.288840535483438	0.132870532316251	0.194294510626636	0.0756462468039919	0.0490628515296051	0.135421946796818	0.0729461797560252	0.193066557748435	0.103930066455893
645	0.127575106967522	0.441130566043953	0.220784434597908	0.0490818284746756	0.288881508788799	0.133199044330495	0.194526949887588	0.0756028485843803	0.0490934019712898	0.134852853734806	0.0730652703882724	0.19357613491713	0.104161771408082
646	0.127639620214666	0.441274625493659	0.221046145105614	0.0491324581221089	0.288923131290549	0.1335217232842	0.19475558701968	0.0755597293695408	0.0491237458276808	0.134276223659367	0.0731824930032657	0.19407318107221	0.104391014450279
647	0.127705494584539	0.441425395961363	0.221295473598588	0.0491841875410035	0.288968229046156	0.133838276390852	0.194986377037527	0.0755193656755977	0.0491554972721697	0.133689055198822	0.0732997860913593	0.194557510672573	0.104619674434964
648	0.127771924905949	0.441578907549095	0.221539744648923	0.049236366162326	0.289014746271648	0.134152327390961	0.195218046403077	0.0754801274761052	0.0491878236470083	0.133097582327459	0.0734171079642403	0.195036646187206	0.104848096269397
649	0.12784324058611	0.441732133896451	0.221772298609401	0.0492907603560478	0.289068017099076	0.134456743319421	0.195458359968445	0.0754475037076684	0.0492235459804138	0.132506379212087	0.0735356034073876	0.195502438476658	0.105074832752385
650	0.127915728718354	0.441883411189776	0.22200236153949	0.0493453893919812	0.289122559921638	0.134758892797871	0.195700265715072	0.0754163232008092	0.0492599279137275	0.131915640542377	0.0736541894807206	0.195965442572681	0.105300983712051
651	0.127994583154417	0.442015301836481	0.222220401028705	0.0493999038437519	0.289182376648374	0.135048950535108	0.195948558798338	0.075392304644641	0.0492991639222921	0.131329294875151	0.0737723734704461	0.196415245472085	0.105523107799876
652	0.12807491706191	0.442139600752881	0.222432307457258	0.0494533288403722	0.289242405243192	0.135333645370686	0.196195588814601	0.0753701934170308	0.0493386397872746	0.130744866477553	0.0738892188983857	0.196857954999006	0.105742492948218
653	0.128159055324508	0.442244378077069	0.222628443158396	0.049503952380891	0.289302978641651	0.135604549887715	0.196439370944281	0.0753529867485698	0.0493787324259032	0.130165368201853	0.0740026223103043	0.19728242442526	0.105954835109317
654	0.128244888937272	0.442344632182424	0.222813125310752	0.0495529052828134	0.289360383223544	0.135866992382951	0.196678968210036	0.0753382966865625	0.0494187005060924	0.129585054169398	0.0741133945384153	0.19769330858954	0.106162703202359
655	0.128332712743708	0.442439576422193	0.222984361992799	0.0495998970002965	0.289414067890337	0.136119501200429	0.196913652809442	0.0753265609016965	0.0494585223655049	0.129003782509448	0.0742210779855349	0.198088244837589	0.106365319128551
656	0.128421085939998	0.442536304397111	0.223139944356404	0.0496463283809991	0.28945900013807	0.136360848911485	0.197141351774207	0.0753181725500766	0.0494984799088711	0.128421686459828	0.0743256984059092	0.198461447423379	0.106562483668895
657	0.128509754961594	0.442633992844802	0.223287097471618	0.0496924580418967	0.289499219544772	0.136596186796006	0.197365289243396	0.0753115866625122	0.0495385105128278	0.127839146508078	0.0744286695041899	0.198822947267952	0.10675671284763
658	0.128598244875735	0.442725236237032	0.223416422747439	0.0497401553520286	0.289528289322316	0.136820332725708	0.197581173034441	0.0753091775816371	0.0495798479073315	0.127247220935735	0.0745303285094067	0.199157447816149	0.106947099419246
659	0.128686662541731	0.44281473993502	0.223541622691679	0.0497881527474754	0.289555021574118	0.137041891756277	0.197795218965526	0.0753076414835938	0.0496214351665051	0.126652798404404	0.0746316696967352	0.199485772433294	0.10713658047344
660	0.128773847258833	0.442887686876576	0.223643233766957	0.0498361981728204	0.289574841384295	0.137248735944557	0.197999441188351	0.0753086080051218	0.049663053212987	0.126035444370415	0.0747308155994662	0.199780689993979	0.107320448711324
661	0.128860922896374	0.44295960162232	0.223738794561144	0.0498837249628041	0.28959467127652	0.137451533576726	0.198201834067007	0.0753096128758313	0.0497042233605482	0.125412615939158	0.0748290305446351	0.200068525292767	0.107502418937316
662	0.128947611797288	0.443027856764728	0.223812904358733	0.049929412954688	0.289614536914192	0.137639984328137	0.19839774108906	0.0753107537118206	0.0497438055028449	0.124770378281228	0.0749239448220844	0.200331250753919	0.107677659848419
663	0.129035426273003	0.443103985908795	0.223875503672542	0.0499745955885908	0.289637247094772	0.137820823971665	0.198592291526811	0.0753123831143417	0.0497831457854696	0.124122807388099	0.075017569335339	0.200582731883815	0.107849510642936
664	0.12912486047831	0.443191445933297	0.22392153911945	0.0500190510000329	0.289664050641978	0.137990711045312	0.198784889806665	0.0753147155760186	0.0498221380261273	0.123467561839439	0.0751093378464596	0.200818032146781	0.108016482977
665	0.12921570563082	0.443299205084106	0.22395154652854	0.0500640254673257	0.289694771761815	0.13815024784422	0.198976195493526	0.0753186512808073	0.0498620468636883	0.122813918927414	0.0752002997942231	0.201037132468817	0.108179076170157
666	0.129307491414798	0.443420496985785	0.223970868579084	0.0501093459718522	0.28972810459674	0.13830288445997	0.199166639451723	0.075323655814337	0.0499025667658514	0.122161344439812	0.0752907240330817	0.201245432830234	0.108338749936042
667	0.129398975909716	0.443574783256916	0.223971411809141	0.0501555122279503	0.289769357413386	0.138442978894575	0.199354149175434	0.0753310201172884	0.0499444210132974	0.121519264719876	0.0753799134140882	0.201430012238525	0.108493085551321
668	0.129490380315138	0.443737840183218	0.223966963200841	0.0502019033040865	0.28981271554163	0.138579739331661	0.199540878912762	0.075339011700719	0.0499866299601224	0.120879974748307	0.0754687745417416	0.201608286076997	0.108646002164541
669	0.129579468728038	0.443931810899422	0.22394551318294	0.0502466548653784	0.289872412498148	0.13870281239354	0.199723063167112	0.0753477733942008	0.0500272560766411	0.12025248488504	0.0755534760568523	0.201758959515578	0.10879198188253
670	0.129668611686363	0.44412865197369	0.223921771359196	0.0502903954772359	0.289936624989504	0.138823252378972	0.199904908531129	0.0753566156327071	0.0500669902584403	0.119625827972034	0.0756370319118393	0.201904818522959	0.108936594888064
671	0.129758251719861	0.444336426903525	0.223888534148459	0.0503293636381719	0.290021255917154	0.138932200563965	0.200085552224199	0.0753657743867965	0.0501025274131224	0.119002062055095	0.0757154087129472	0.202029921877875	0.109075226312259
672	0.129849605814176	0.44454421122574	0.223850741673268	0.0503654919378738	0.290114153337501	0.139035427246916	0.200266794570196	0.0753757241025876	0.0501359593013194	0.118373844596341	0.0757916278723842	0.202145623137289	0.109211340382129
673	0.12994400712772	0.44475201224552	0.223804850950158	0.0503965715953817	0.290221746744866	0.139128482370681	0.200449101188061	0.0753870799725153	0.050165648493543	0.117737713285473	0.0758640112244066	0.202244609560257	0.109342979155422
674	0.130040460495275	0.444949878021459	0.223747256255141	0.0504243464724859	0.290332188237369	0.139210931595	0.200629950700968	0.0754005837270459	0.0501937110106405	0.117097314573945	0.0759334944458288	0.202325519547727	0.10946989170694
675	0.13013852619098	0.445139937534378	0.223680465582195	0.0504495247364157	0.290444867511054	0.139285047612611	0.200809655345694	0.0754157751051933	0.0502204954258531	0.116453562904756	0.076000698993208	0.20239222662159	0.109593090798491
676	0.130237119963656	0.445298710181104	0.223591046431249	0.0504755193774216	0.29054342112311	0.139347289302002	0.200981973026327	0.0754339263223285	0.0502498956386119	0.11580852142274	0.0760669878601087	0.202433682816494	0.109712013423062
677	0.130335889761989	0.445447053872432	0.223494084454302	0.0505017861441195	0.290637266181291	0.139405572881987	0.201151828385597	0.0754530641524597	0.0502801677838861	0.115163050003114	0.0761329715001832	0.202466722051744	0.109829510558639
678	0.130432046572352	0.445540741478006	0.223363578447632	0.0505333061156797	0.290704048349042	0.139450847224726	0.20130535066417	0.0754740524673142	0.0503167309352346	0.114523070054774	0.0761996587693126	0.202465643724293	0.10994306135527
679	0.130527739171505	0.445624840038448	0.223226170028909	0.0505657861576449	0.290766582053478	0.139493337668167	0.201455738125268	0.0754951539381344	0.0503543361613974	0.113883176481481	0.0762664066498541	0.202457414759419	0.1100557921848
680	0.13062144131275	0.445668113120715	0.223056897500328	0.0506024472821265	0.290812244150562	0.139522754538277	0.20159212340208	0.0755162222145709	0.050396227952749	0.113241515172612	0.076333259592394	0.202415905479398	0.110164721294173
681	0.130715187394379	0.445708365376219	0.222877913080703	0.050639842450369	0.290857453177328	0.139546712305733	0.201725456123832	0.0755372647001322	0.0504388605395564	0.112599627458271	0.0763994245707331	0.202362522747561	0.110271511147525
682	0.130809022688298	0.445742484437993	0.222679210579263	0.050678727949884	0.290901742334052	0.139559586440528	0.201852591233794	0.0755582548224014	0.0504829971656228	0.111957280072216	0.0764641927732705	0.202285033310521	0.110373957662893
683	0.130901922984296	0.445787457810685	0.222466569866461	0.0507172074997176	0.29094999339289	0.139563536993071	0.201976795484089	0.0755785945018424	0.0505267397805621	0.111315024019647	0.0765265686043244	0.202190459316563	0.110471835023179
684	0.130993960205287	0.445842450547301	0.222241063112403	0.0507553123267684	0.29100190159214	0.139559250392766	0.202098294325459	0.0755983337725188	0.0505701186929225	0.11067285227491	0.0765867360924705	0.202080114962371	0.110565494701854
685	0.131080807235007	0.445917417685351	0.221993413540487	0.0507911118849304	0.291058243928258	0.139542576433894	0.202213691429719	0.0756159301670787	0.050610977209087	0.110034814934321	0.0766423735745288	0.201947921915705	0.110651874981027
686	0.131165534327445	0.446000543381734	0.221736719719023	0.0508259698543913	0.291116397390703	0.13952084284969	0.202326596275158	0.0756326513023798	0.0506508062676505	0.109398466294017	0.0766961607724104	0.20180680475521	0.110735281984347
687	0.131240431233539	0.446082857493614	0.221448827614866	0.050854181637142	0.291169906441987	0.139481496443134	0.202425577917607	0.075644628800022	0.050684339428591	0.108772814789936	0.0767415843327489	0.20163746088779	0.110807408054033
688	0.131313789178136	0.446163089232416	0.221154119868081	0.0508809538564979	0.291222208703614	0.139438267163296	0.202521905316888	0.0756557136130292	0.0507166683452492	0.108148137114387	0.0767853345990305	0.201461550592519	0.11087739226834
689	0.131382046415357	0.446225302012901	0.220825841237635	0.0509006858418241	0.291267783894643	0.139375769371287	0.202606737708343	0.0756629866231167	0.0507437631041077	0.107522702268877	0.076821469775294	0.201251667317591	0.110938141054844
690	0.131449071285021	0.446284620465787	0.220488920879882	0.050918823876975	0.291312552890794	0.139306539986806	0.202688580755574	0.0756692476122379	0.0507698853567964	0.10689802085648	0.0768554933268521	0.201029815927178	0.110995781550346
691	0.131513220630382	0.446337185487605	0.220131836491747	0.05093324269505	0.291355440765564	0.139221603553221	0.20276344866628	0.0756731472191047	0.050793738428422	0.106275097454681	0.0768845897540976	0.200780038933963	0.111046169366847
692	0.131574606093433	0.446398569992876	0.21975980683863	0.0509464522457729	0.291399071069702	0.139124349721608	0.202834001205589	0.0756749219964905	0.0508169466978468	0.105649474097878	0.0769107343551298	0.200508559943429	0.111090841395163
693	0.13163311486265	0.446469133960514	0.219372221909717	0.0509584031712926	0.291443474106449	0.139014275741026	0.202900062235894	0.0756744852166613	0.0508394838466136	0.105021040583826	0.0769338066472462	0.200214493159766	0.111129564337819
694	0.131684737006542	0.446553728576072	0.218965628816645	0.0509684254690079	0.291484972812923	0.138888853717978	0.202955681109541	0.0756691195885926	0.050859786967275	0.104390368290143	0.0769518598481986	0.199894640020355	0.111159051615399
695	0.131733265159346	0.446644626816057	0.218550495823733	0.0509775812817676	0.291525166675361	0.138756536197591	0.203006608579471	0.0756615395504454	0.0508790863941499	0.103758690167931	0.0769676580951498	0.199563201706622	0.111184389536206
696	0.13177302855184	0.446736189812976	0.218107520836231	0.0509845414565202	0.291560471127622	0.138608711222818	0.203043105495346	0.0756472747439738	0.0508943354249101	0.103116509090323	0.0769774864069542	0.1992010295928	0.111200132936937
697	0.131810881613095	0.446825735057588	0.217658399500904	0.0509909972156758	0.291594539743041	0.138457641514291	0.20307662597031	0.0756315832195612	0.0509086019687236	0.102472524632851	0.0769859723489233	0.198832039219786	0.111213836133312
698	0.131840510602858	0.44689103369092	0.217182256475308	0.0509950953550684	0.291622063718911	0.138293575875601	0.203098547107308	0.0756099673709722	0.0509179216701943	0.101824271850611	0.0769883829815375	0.198432835052563	0.111219122931522
699	0.131867422828113	0.446946014617236	0.216696971052208	0.0509981613882818	0.291646228036211	0.138124602861715	0.203117534877268	0.075586512330809	0.0509257891701966	0.101178424878564	0.0769885176434961	0.198023711559879	0.111221318821187
700	0.131887349087494	0.446974464296941	0.216188176606958	0.050998573434177	0.291661753231474	0.137943010883042	0.203128979703414	0.0755583279408834	0.0509299224378511	0.10053876427558	0.0769827998094828	0.197589081230297	0.111215566660307
701	0.131900142040769	0.446986274265677	0.21565678918078	0.0509954061275983	0.291669029442208	0.137747865572753	0.203132072881118	0.0755250288806673	0.0509305924409558	0.0999024473914439	0.0769713315120853	0.197132188971182	0.111201669945256
702	0.131904891053118	0.446979320305022	0.215099924563342	0.0509882025299321	0.291667003606559	0.137537436718301	0.203125748242495	0.0754859622135277	0.0509273570606319	0.0992699010838798	0.0769533786495948	0.196650192834083	0.111178588945712
703	0.131897527174554	0.446956364362913	0.214512786845135	0.0509749578385159	0.291658749554279	0.137306635666098	0.203102727979617	0.0754389507665791	0.0509186108393982	0.0986459860147204	0.0769266496713564	0.196137314029786	0.111142653484555
704	0.131884197245243	0.446925526847848	0.213910738495208	0.050958737683014	0.291647427872914	0.137065800546345	0.203071484498823	0.0753880262191277	0.0509071503233881	0.0980263221525365	0.076895598128645	0.195609224359556	0.11110038672141
705	0.131857870251552	0.446886695218094	0.213280138841279	0.0509347967790588	0.291639950620089	0.136802476971888	0.20301970297176	0.0753283162023259	0.0508885558796245	0.0974180798854465	0.0768540256428573	0.195045268492457	0.111043361148825
706	0.131828981242703	0.446847152061175	0.212643349807452	0.0509092740810272	0.291633465871522	0.136534337845714	0.202963849104038	0.075266751797155	0.0508684664211689	0.0968114779555057	0.0768102406511936	0.194473376145236	0.110983250472584
707	0.131790380074275	0.446815175837193	0.21197643231516	0.0508770441850125	0.29163353056386	0.136243400462258	0.202892274720265	0.0751967020576227	0.0508416555634087	0.0962038367305498	0.076756422554905	0.193861108238882	0.110909356822082
708	0.131749452839195	0.446785571558624	0.211302284587488	0.0508437859620567	0.291633328822149	0.13594711272561	0.202817982210446	0.0751246303438351	0.0508134319102134	0.095595514689083	0.0767005078063563	0.19323995254796	0.110832216196922
709	0.131701905260567	0.446762718201614	0.210607558497582	0.0508076009624223	0.291632368768145	0.135635597060645	0.202735953495721	0.0750468037802437	0.0507811872238565	0.0949852549390849	0.0766386256629131	0.192593500854807	0.110745834182352
710	0.13165096210303	0.44673933609764	0.209898981467827	0.0507701546488898	0.291629253318612	0.135314861574799	0.202650795914776	0.0749657839486232	0.0507468369799218	0.0943739861032271	0.0765734442043993	0.191931922066688	0.110654137669489
711	0.131596032831123	0.446715333290708	0.20917414463912	0.0507312276625203	0.291623607622153	0.134983302820962	0.202561965316962	0.0748810154980121	0.0507100149944828	0.0937615326883168	0.0765043896368894	0.191252585384479	0.110556202397761
712	0.131539411527333	0.446694784874458	0.208430683775467	0.050689725896891	0.291624593606104	0.134639990807003	0.202470809222182	0.0747928914083772	0.0506699799299869	0.0931513358051556	0.0764300642560965	0.190551372865741	0.110451289114103
713	0.131481918570757	0.446676015992801	0.207677628711991	0.050646897729825	0.291628995910265	0.134290624083285	0.202378455144116	0.074703038656215	0.0506282896429465	0.092542301377744	0.0763530236078547	0.189838890976669	0.110342781097027
714	0.131426951694651	0.446673409422202	0.206906976472917	0.0506021013031485	0.291657527643568	0.133930043448419	0.202285867012848	0.0746126120853515	0.0505847150931394	0.0919453832563013	0.0762708762780543	0.189101086712393	0.110227412277361
715	0.131372598078293	0.44667359162241	0.206132490404764	0.0505570405831557	0.291691298565174	0.133566891145143	0.202193057114906	0.0745223471697479	0.0505409572183886	0.0913516929589987	0.0761877723987558	0.188357402001416	0.11011054859754
716	0.131321409713669	0.446676244407586	0.205342820632759	0.0505128590927734	0.291745610706732	0.133192049190031	0.202097369798796	0.0744360783133143	0.0504991328532449	0.0907776706300948	0.0761027065946289	0.187586172163758	0.109987763147781
717	0.131269719666358	0.446671277503115	0.204547009206695	0.0504690848695382	0.291796259893319	0.132811828753124	0.201998016383912	0.0743511827458114	0.0504582827865667	0.0902081288216391	0.0760170898821775	0.186804498468832	0.109862408495162
718	0.131216601752938	0.446644623789648	0.203733717688311	0.0504264697912598	0.291836483746527	0.132416300329571	0.2018882286879	0.0742701957698805	0.0504202057232132	0.0896513392636897	0.0759299051998795	0.185993099949372	0.109729741495941
719	0.131160444161109	0.446598202476773	0.202903976279425	0.0503835926362148	0.291856989060818	0.132006959141814	0.201768307009669	0.0741906522962767	0.0503832289383765	0.089096584574303	0.0758400420044577	0.185157766418892	0.109589682929838
720	0.131100718251145	0.446528575721118	0.202054924129515	0.0503404078258349	0.291854346525076	0.131581402969993	0.201636488917529	0.074112803368883	0.0503475437848422	0.0885442186436638	0.0757470344675426	0.184294335266779	0.109440947306959
721	0.131036922703856	0.446442092619874	0.201180971252053	0.0502962652629976	0.291831375139853	0.131136155119504	0.201491590259466	0.0740358135386274	0.0503123316584073	0.0879903467400529	0.0756489553256146	0.183397736919051	0.10928055979174
722	0.130971030676734	0.44634692594666	0.200294190727064	0.0502516293125307	0.291797931317021	0.130680763070913	0.201339953128048	0.073959266273564	0.0502773632125995	0.0874356990321839	0.07554826353868	0.182484052440247	0.109114169786527
723	0.130903778203715	0.446257544866648	0.199382005319075	0.0502073065808783	0.291766550102682	0.130206797447335	0.201177555309135	0.073885192018725	0.0502433172299361	0.0868813121681416	0.0754429316903907	0.181537314381758	0.108936025143873
724	0.130836473098426	0.446170025130045	0.198464261106294	0.050163160617072	0.29173643426864	0.129728819297519	0.201012729426709	0.0738119169210838	0.0502096076277356	0.0863272393173604	0.0753366558813289	0.18058319159529	0.108755363282453
725	0.130771813085243	0.446096910935035	0.197524221250283	0.0501209851868074	0.291720882274791	0.129235348051911	0.200837307806521	0.0737448548182727	0.0501788153475592	0.0857774207548105	0.0752274253084249	0.179597674176847	0.108565243875244
726	0.130708201292997	0.446020876318868	0.196578077453549	0.0500792412528162	0.291705567818746	0.128737171542085	0.200657775822671	0.0736803806050015	0.0501492023496627	0.0852296650767002	0.0751172464747425	0.17860278300213	0.108372254582061
727	0.130647572898802	0.445936529734797	0.195614560902454	0.0500387254236029	0.291690929431837	0.128225603126406	0.200466545111476	0.0736232719234979	0.0501229457705629	0.0846877806850722	0.0750043687449983	0.177581212674946	0.108171097151879
728	0.130589650062472	0.445830390096258	0.194638897792418	0.0499990573464461	0.291669927508962	0.127703279512948	0.200266831829251	0.0735717859563759	0.0500993912454981	0.0841484263089652	0.0748898651755172	0.176540334110551	0.107963898428396
729	0.130534903315808	0.445698667306823	0.193648975678411	0.0499603844564858	0.291641455348212	0.127168330232532	0.200057160746254	0.073526900567006	0.0500790086969091	0.0836120419510786	0.0747734530115621	0.175476789354647	0.107749607751909
730	0.130485979476589	0.4455295110649	0.192651588304454	0.0499238990081392	0.291604619330075	0.126621403189414	0.199837862297153	0.0734911591942186	0.0500629267843566	0.0830832241154831	0.0746566440519697	0.174394434399985	0.107528195656469
731	0.130439923636558	0.445341917450858	0.191650524011419	0.0498884909564084	0.291563663800091	0.126068576651233	0.199613822011016	0.0734599215907926	0.0500489630955236	0.0825581330744489	0.07453963965572	0.173302814720562	0.107303275996471
732	0.130402168016364	0.445110781308491	0.190640758699663	0.0498565045206529	0.291516534816379	0.125500114881215	0.199379268684211	0.0734401204289331	0.0500404384998058	0.0820439235750843	0.0744227169648486	0.172185560440761	0.107069253675095
733	0.130366000046907	0.444870314702117	0.189629280385762	0.0498251518960808	0.291467633413999	0.124928260718433	0.199142164098362	0.0734226206389501	0.0500329561835453	0.0815325447040031	0.0743056229053402	0.171062658440253	0.106833053865052
734	0.1303344473752	0.444592327787805	0.188612317065747	0.0497954272396069	0.291407439837745	0.124342375595778	0.198892034929989	0.0734129923465027	0.0500285234888166	0.0810371704791638	0.0741860898877979	0.169915612800358	0.106585995363377
735	0.130302475598743	0.4443101909154	0.187592702375315	0.0497659487645313	0.291343632491075	0.123752240645865	0.198636414156563	0.0734043002896363	0.050024288264571	0.0805462276618275	0.0740651426341288	0.168760886702878	0.106335101477107
736	0.130269370687218	0.444016833785928	0.186565919164867	0.049737135891014	0.291270054579949	0.123150615422256	0.198365945710216	0.0733981395363778	0.050020586942002	0.0800672660573695	0.0739403717050057	0.167585394923776	0.106073837847304
737	0.130234706664679	0.443731796825498	0.185539216750706	0.0497085693997306	0.29119543922715	0.122544958198627	0.198087040824926	0.0733930056739625	0.0500170061045786	0.079596904462121	0.0738138039658047	0.166403255799282	0.105807343935936
738	0.130198353605209	0.443455773381532	0.184512601865857	0.0496802698225336	0.291119699979206	0.121934932974978	0.197798996464115	0.0733889842766273	0.0500135557927296	0.0791358595435162	0.0736852896823527	0.165213915383947	0.105535183886206
739	0.130161946351299	0.44319761694637	0.183479113898035	0.0496513972514856	0.291049137946319	0.1213147722661	0.197501018137693	0.0733877728759471	0.0500110948406886	0.0786812667667043	0.073554216075645	0.164007198964338	0.105255135605577
740	0.130125513594123	0.442947868515351	0.182442391538225	0.0496222550362724	0.29098101224993	0.120689841917114	0.197198365003925	0.0733878838266341	0.0500090994697338	0.0782297102919126	0.0734219380815229	0.16279230560154	0.104971375216289
741	0.130093007439149	0.442715231699982	0.181411700990585	0.0495925140229693	0.290913864983555	0.12005979818161	0.196890987905825	0.0733939000029173	0.0500093654014787	0.0777872631873025	0.0732895182553009	0.161571057887478	0.104683324621039
742	0.130061568643734	0.442485833423154	0.180381680698407	0.049563017059345	0.290846244298239	0.119428410145938	0.196582404757181	0.0734014953961065	0.050010366552174	0.0773467470633774	0.0731572946015576	0.16034779951928	0.104394404174076
743	0.130036015012191	0.442267796190489	0.179350899551059	0.0495367360198612	0.290772614089267	0.1187898198791	0.1962675305785	0.0734176787379857	0.0500159756607679	0.0769143714301091	0.0730272317154013	0.159112152159542	0.104102049978234
744	0.130011727747573	0.44205230043658	0.178321577240948	0.0495128244332532	0.290697563427912	0.118151886374349	0.195950593194388	0.0734361089917481	0.050023590117096	0.0764873222818232	0.072898792826583	0.157876784568754	0.103809846255364
745	0.129990395339112	0.441842734799768	0.177295658884387	0.0494944415700224	0.290619198377661	0.11751548531447	0.195628841664269	0.0734597820399048	0.0500358837181369	0.0760727015984961	0.0727741432648867	0.156642069772185	0.103517993636098
746	0.129969943859624	0.44162718180595	0.176264411479157	0.0494810292262294	0.290545893703564	0.116877958003176	0.195302431725263	0.0734855055161963	0.0500524529530421	0.0756630796267765	0.0726520285688361	0.155401127990406	0.103225602757187
747	0.129950373309108	0.441405641455125	0.175227835025256	0.0494725874018741	0.29047764940562	0.116239304440467	0.194971363377368	0.0735132794206226	0.0500732978218116	0.0752584563666644	0.0725324487384312	0.154153959223417	0.10293267361863
748	0.129931138773395	0.441181592008043	0.174196101751137	0.0494695257912087	0.290429448221472	0.115605907782889	0.194640622847971	0.0735413380087006	0.0500981112339617	0.0748613772376772	0.0724173015020299	0.152910508349007	0.102642567207367
749	0.129912041483165	0.440956517718828	0.173166346677211	0.0494686617326138	0.290389433661268	0.114974658311914	0.194310016216269	0.0735695128760167	0.0501245456004503	0.0744673795143608	0.0723039647617708	0.15166857605044	0.102353613741055
750	0.129890768943888	0.440759363856167	0.172144220955003	0.0494692508180771	0.290379807536063	0.114346397467146	0.193978845234485	0.0735961630665816	0.0501487338542323	0.0740843418187313	0.0721928417434995	0.150426738819368	0.102065092749717
751	0.129868416234063	0.440569924645576	0.171126285031379	0.0494691511346244	0.2903751751053	0.113719732381703	0.193647453599978	0.0736218886684907	0.0501710699919633	0.0737052166446345	0.0720815373793952	0.14918738807353	0.101776538897505
752	0.129839719926717	0.440416809570464	0.170133540921405	0.0494629465504643	0.290385123136605	0.113102601956258	0.19331485315435	0.0736419397631023	0.0501814529940964	0.07334683426404	0.0719672975892419	0.147966202602692	0.101487430402388
753	0.129808668913682	0.440266803145275	0.169148577313497	0.0494535791049827	0.290395147165835	0.112487751475761	0.192980191699636	0.0736596685083543	0.0501869277250108	0.0729955313685834	0.0718508020859404	0.146749708013158	0.10119707950189
754	0.129772614151055	0.440123402601174	0.168180147272478	0.049437490579193	0.290405332690657	0.111877745878277	0.192641150600609	0.073672462261217	0.0501819723795854	0.0726592723790446	0.071729513192199	0.145543181546393	0.100904088489957
755	0.129736547867342	0.4399759778886	0.16723401498137	0.0494212807499866	0.290419379597447	0.11127901079483	0.192302976965716	0.0736848277883079	0.0501756528533315	0.0723396017226703	0.0716100767421331	0.144354460154804	0.100615307625557
756	0.129700471366814	0.439824984573796	0.166307656166597	0.0494049633498256	0.290436850748622	0.110690270318171	0.191965572591468	0.0736968135680161	0.0501681235818148	0.0720346414749513	0.0714922830251379	0.143181528169504	0.100330260288214
757	0.129668446576055	0.43966838474695	0.165412042141469	0.0494006051230022	0.290465407231263	0.1101212128635	0.191628407382224	0.0737152105746228	0.0501726500761686	0.071760170286887	0.071387564771212	0.142033571969411	0.100058195084464
758	0.129637845358999	0.439509815064522	0.16452723033973	0.0494004487678919	0.290497858560093	0.109559071065203	0.191291326203926	0.0737358601744639	0.0501814123801526	0.0714964114711337	0.0712874405989052	0.140894391045201	0.0997906911708948
759	0.129604858443349	0.439311134102319	0.16365416868319	0.0494193566882697	0.290513470212472	0.109009409864129	0.190937196061682	0.0737634012655177	0.0502111916015017	0.0712566071457122	0.0712039576795552	0.139765916989744	0.0995341341288108
760	0.12956945740228	0.439097979673367	0.162775827166768	0.0494406317435738	0.290520511851545	0.108457907438383	0.190576026367762	0.0737910629813572	0.0502439468969052	0.0710167162914739	0.0711217826993311	0.138632765023922	0.0992770952963627
761	0.129521087841307	0.438814771946101	0.161864062015072	0.0494696347269121	0.290484012441528	0.107892249122774	0.190180050659733	0.0738173528806203	0.0502872984085252	0.070769190785595	0.0710420561934471	0.137469911622721	0.0990140614621097
762	0.129464285254301	0.438499587454004	0.160935576600061	0.0494961780819041	0.290427245146738	0.107318541498796	0.189768684492241	0.07383913689527	0.0503290051302878	0.0705132165393808	0.0709586360175829	0.136293770130586	0.0987456435383035
763	0.129392490621015	0.438127555379986	0.15997736627249	0.0495183487642803	0.290334446056794	0.106730523993271	0.189329957507925	0.0738529104483846	0.0503677877811927	0.0702422223103484	0.0708686493173096	0.135094005365682	0.0984676538997359
764	0.129309260323693	0.437721773654581	0.159005228985747	0.0495327649825241	0.290221171924692	0.106135236299424	0.1888751681776	0.0738580641741546	0.0503990242702706	0.0699610334429436	0.0707716890034033	0.1338838026677	0.0981833856869692
765	0.129217403121922	0.437290531665851	0.15802258539647	0.0495413313418609	0.290092451708156	0.105534464077544	0.188408261638882	0.0738567152231559	0.0504245680407773	0.0696721538834333	0.0706694678932476	0.132665725739502	0.0978943810059469
766	0.129120476839423	0.43683744034509	0.157045048618477	0.0495454996281173	0.289952596607826	0.104939138985076	0.18793698413212	0.0738501106551015	0.0504453168490552	0.0693820585101819	0.0705659152020768	0.131456413712786	0.09760715203899
767	0.129022120816206	0.436378186392218	0.156068952223154	0.0495484274322227	0.289809600899247	0.104345350262442	0.187464473788217	0.0738420237335185	0.0504647132320891	0.069091620215106	0.0704619869367736	0.130249573837771	0.0973204239144617
768	0.128929337454647	0.435905531487255	0.155119154646623	0.0495588363612529	0.289670417796571	0.103775558850411	0.187002156811354	0.073837452680009	0.0504903117937337	0.0688152320716385	0.070368510993218	0.129077743787532	0.0970483805585074
769	0.128838359471403	0.435435501820327	0.154176580383466	0.0495720347095125	0.289534441138194	0.103212474763415	0.186542958999617	0.0738343723650686	0.0505179891486682	0.0685440774880518	0.0702781408181355	0.12791569898405	0.0967803169168375
770	0.128754377843371	0.434976514558144	0.153261836795272	0.0495960884670162	0.289411136212331	0.102675250388258	0.186095825995171	0.0738371129491287	0.0505537310836869	0.0682932894610951	0.0701997714009152	0.126791380629228	0.0965275788083218
771	0.128672918728252	0.434535912270558	0.152360242485663	0.0496246371664516	0.289291448433351	0.102150186243758	0.185653506601059	0.073842182805265	0.0505919860302735	0.0680518393750038	0.0701264880459918	0.125685190208208	0.0962815513251582
772	0.128595089570739	0.434121766409829	0.151477570308649	0.0496596541969596	0.289176965816961	0.101642620967765	0.185218114109622	0.0738506045407307	0.0506338572617993	0.0678238268135723	0.0700605236587638	0.124605086326074	0.0960451805955502
773	0.128520588601037	0.433729315106284	0.150612768217988	0.0497006923195481	0.289056857481685	0.101151845791482	0.184787809443171	0.0738633321132706	0.0506792763566029	0.0676045600155493	0.070001925762144	0.12354820930168	0.0958182951604166
774	0.128448127488381	0.43335016046682	0.149758918760898	0.0497454207888956	0.288933301125157	0.100671361321474	0.184360623121067	0.0738786987472432	0.0507268699482541	0.0673906535241316	0.0699478428113808	0.122505568093321	0.0955972232928643
775	0.128380361623512	0.432961861088899	0.148929201474031	0.0497982047001206	0.28879788775041	0.10021159653333	0.1839397032231	0.0739023907117167	0.0507815155754218	0.0671877208565255	0.069904537978009	0.121489985470762	0.0953896118391466
776	0.128313761916623	0.432570974042936	0.148105666638825	0.0498529915027296	0.28866029297107	0.0997569652227618	0.183520470529853	0.073928220499879	0.0508379779518953	0.0669878129250032	0.0698639407887038	0.12048126838433	0.095185396334178
777	0.128252069747079	0.432162935413249	0.147311885035666	0.0499162498637815	0.288528629583061	0.0993236864077234	0.183110927122774	0.07396443354038	0.050903376884108	0.0668065550436472	0.0698353454678923	0.119504313285319	0.0949965167456415
778	0.12819278940588	0.431763083187648	0.146526532584186	0.0499813921747306	0.28840665706743	0.0988958796028484	0.182705082117771	0.0740034476898782	0.0509709281927849	0.0666311344052311	0.0698096468903842	0.118536974263893	0.0948117458881273
779	0.128140744549721	0.431387790174302	0.14576646758774	0.0500521863353712	0.288313757168929	0.098484488828463	0.182310332318996	0.0740508651663684	0.0510449366308547	0.0664732254956341	0.0697926385427859	0.11759848347522	0.0946393012236806
780	0.128094774498517	0.43103464124032	0.145021510551427	0.050126223516861	0.288237042548084	0.098082356976809	0.181920740255015	0.0741026100188421	0.0511224946496954	0.0663237413286328	0.0697799482415217	0.116676742920463	0.0944728554903701
781	0.128055935740087	0.430707487529938	0.144294288946576	0.0502040677228261	0.288179328035791	0.097691094295318	0.181537202923182	0.074159434834427	0.0512042195677018	0.0661841470768525	0.0697723269511715	0.115774665683782	0.0943134519805676
782	0.128022024220888	0.430385028574966	0.143595032092815	0.0502831636915463	0.288123901841641	0.097313392274276	0.18115876204655	0.0742179899868785	0.0512862846483965	0.0660515911945571	0.0697667291362112	0.114899875589202	0.0941589053257395
783	0.127990431402504	0.430064778916656	0.14290893512192	0.0503628487250925	0.288069552503086	0.096942071740504	0.180782719501778	0.0742773594155027	0.0513685098056503	0.0659223474861368	0.0697620835449637	0.11403792650267	0.0940066442497227
784	0.127960935356904	0.429701194546571	0.142254573187829	0.0504438776350174	0.287993943491137	0.0965854854143353	0.18040970657568	0.0743403615558546	0.0514501181043532	0.0657994149418305	0.069758691564035	0.113203497832497	0.093858460064884
785	0.127932719325639	0.429325405218211	0.141607701629615	0.0505257577126424	0.287912813338866	0.096232825074856	0.180038160673328	0.0744052271606436	0.051532417000842	0.0656782460239031	0.069756292870094	0.112375730794381	0.0937120634927981
786	0.127913691058162	0.428887975045896	0.140992942683011	0.0506138034258432	0.287805641324451	0.0958991088790342	0.17967644795943	0.0744828230637817	0.0516216174459045	0.0655659294597081	0.0697614392936309	0.111577305846787	0.0935772204666499
787	0.127901027581358	0.42843847062237	0.140388140272518	0.0507058479738843	0.287692350709274	0.0955728163800425	0.179319640295681	0.0745671248687811	0.0517161744452989	0.0654569912592058	0.0697716903263781	0.110789110725757	0.0934489785781604
788	0.127902530896702	0.427962091252604	0.139805499184334	0.0508067931543118	0.287565441273047	0.0952630475933503	0.1789737503242	0.0746663527134071	0.0518226540978835	0.0653555726424064	0.0697933032312384	0.110023685218694	0.0933354295444595
789	0.12791334396435	0.427493801249249	0.139240092284612	0.050911828995604	0.287438601018106	0.0949649741416547	0.178638276931193	0.0747725164412771	0.051935644851427	0.0652590828170942	0.0698217810482566	0.109280557401445	0.0932319145146887
790	0.12793241285008	0.427032684834975	0.138689968533147	0.051020492404078	0.287311822112608	0.0946772720247673	0.17831204088136	0.0748848308580616	0.0520544096001605	0.0651669638068743	0.0698563466175657	0.108557203007239	0.0931372975638748
791	0.127951357743906	0.426592521426678	0.138150194210573	0.051126197225639	0.287193652726457	0.094394845845744	0.177991990449465	0.074994815372169	0.0521708986473835	0.0650742268883398	0.0698902204823412	0.1078555368742	0.0930443855703356
792	0.12797025907301	0.426159719885346	0.137614056173825	0.0512308625436899	0.287078508306564	0.094114273374619	0.17767411334279	0.0751039812718222	0.0522865881238055	0.0649812728668841	0.069923851315794	0.107161490941031	0.0929520726158389
793	0.127980069731626	0.425724971304006	0.137083100920534	0.0513307512862986	0.286974228569222	0.093836907715121	0.17735724420538	0.0752063455184677	0.0523949861985686	0.064881910867094	0.0699530516673837	0.106486639732153	0.09285557944095
794	0.127990078925891	0.425286571523684	0.136556746893961	0.0514323682323153	0.286872008446968	0.0935635235757865	0.177042637744955	0.0753099775031472	0.0525045904023308	0.064783317391264	0.0699841431027451	0.105818894246156	0.0927609324186112
795	0.12800339343399	0.424830845624249	0.136051525881344	0.0515436502945427	0.286777052239085	0.0933087545817542	0.176738819458382	0.0754215468255331	0.0526219569954721	0.0646901227528543	0.0700256059594769	0.105180909016718	0.0926763731388856
796	0.128028685787045	0.424375411614465	0.135565268694974	0.051667488693524	0.286689381241204	0.093070571030257	0.176447644924146	0.075546661726587	0.0527529048172528	0.0646075087830567	0.0700809400989041	0.104563028043683	0.0926056767828902
797	0.128073520939764	0.423920453845691	0.135109952488273	0.0518118137472091	0.286613596638589	0.0928594479376329	0.176177099670037	0.0756938773086257	0.0529060114857611	0.0645421580094157	0.0701589063311503	0.10397794875215	0.092557598881402
798	0.12814951340534	0.423501616424826	0.13470580331323	0.0519795228582238	0.286560245325553	0.0926869221129547	0.175945368786779	0.0758675937277629	0.0530858684434159	0.0645035417938883	0.07026433759774	0.10344931230544	0.0925420643852491
799	0.128246277412822	0.423106859235898	0.134335765492627	0.0521628213407915	0.286521849538902	0.0925401278002404	0.175739514150755	0.0760589773716325	0.0532835589271684	0.0644827486171033	0.0703880788872253	0.102958304421946	0.092548225492653
800	0.128378533328692	0.422787571057998	0.134045518892183	0.0523643606226295	0.286514325002389	0.0924463226571321	0.175595572708377	0.0762697557805606	0.053501416245441	0.0644957963358516	0.0705358221932444	0.10256498851648	0.0925937235570201
